# Supplementary material for: SILAC-iPAC: A quantitative method for distinguishing genuine from non-specific components of protein complexes by parallel affinity capture
Source: PubMed Central journal article supplement (PMC4329988; doi:10.1016/j.jprot.2014.12.006), 2015-02-06
Supplement: mmc1.pdf [file mmc1.pdf]

**Supplemental Fig. S1.** Mass Spectrometry data workflow and protein acceptance criteria.

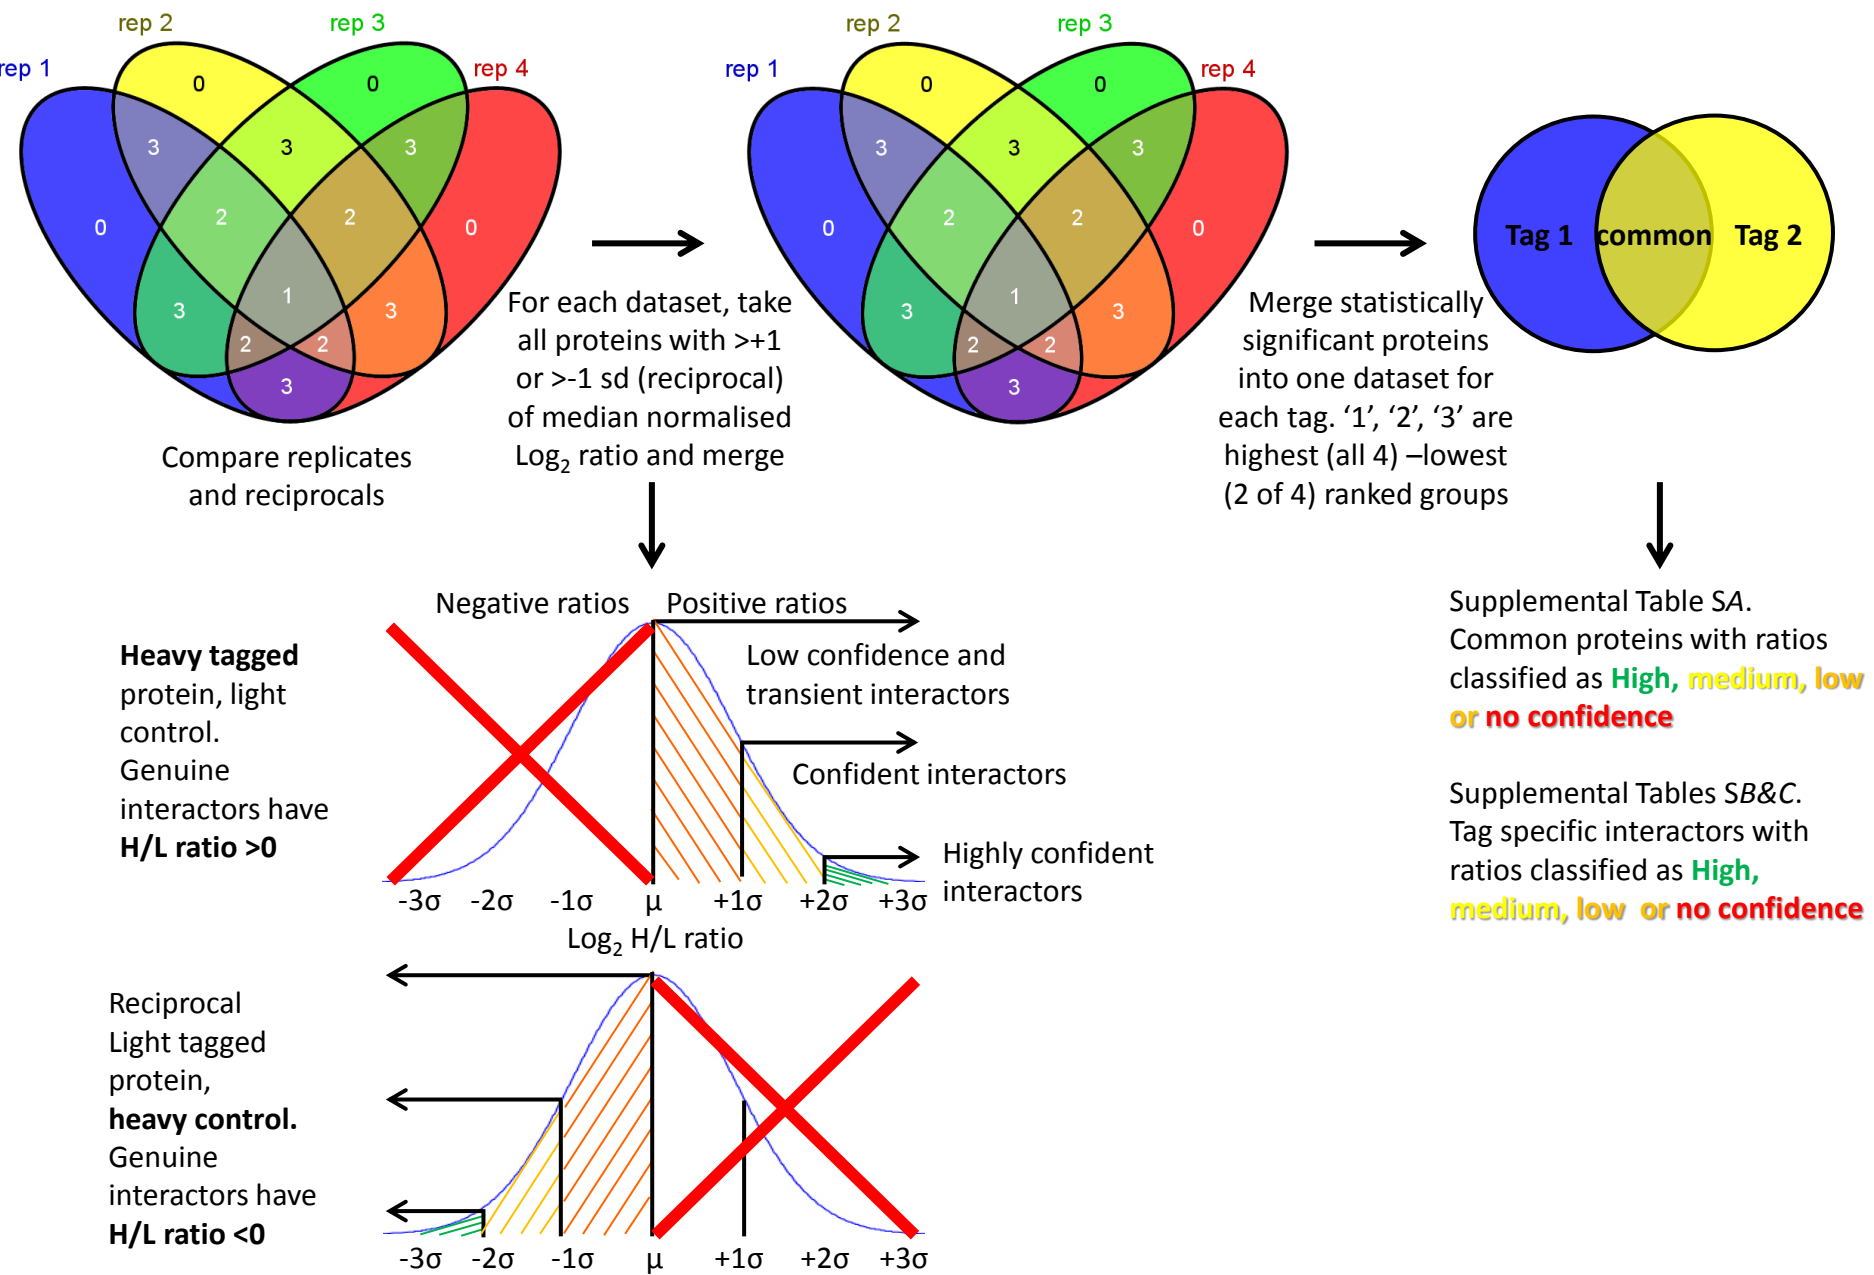

## Supplemental Fig. S2. GO annotation and proteins over- and under-represented in DT40 lysate.

A) Pie chart showing the GO cellular components classification of DT40

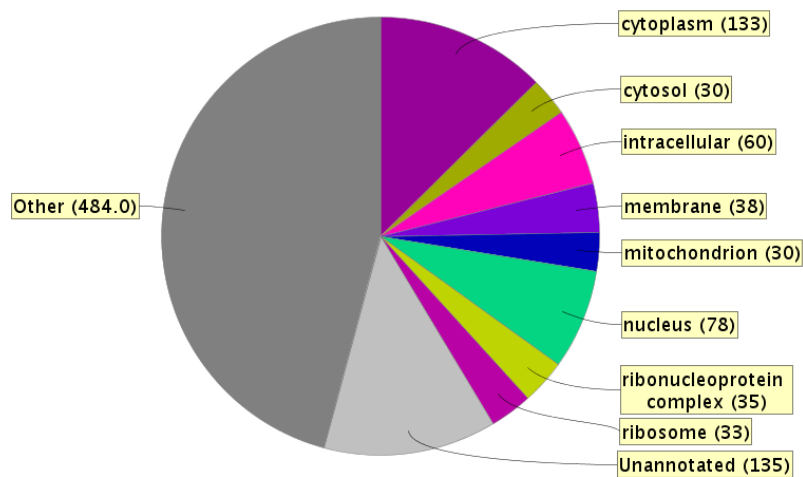

B) Proteins under-represented in DT40 compared to the *Gallus gallus* SwissProt proteome

| Description                              | Count [%] | Ref. Count [%] | Count | Ref. Count | Raw p-value | FDR p-value |
|------------------------------------------|-----------|----------------|-------|------------|-------------|-------------|
| cellular_component                       | 73.38     | 89.85          | 306   | 2143       | 7.29E-28    | 3.99E-24    |
| intrinsic to membrane                    | 6.95      | 22.39          | 29    | 534        | 4.20E-20    | 3.28E-17    |
| integral to membrane                     | 6.95      | 21.3           | 29    | 508        | 4.17E-18    | 1.14E-15    |
| extracellular region                     | 2.16      | 12.87          | 9     | 307        | 5.62E-17    | 1.28E-14    |
| membrane                                 | 17.75     | 33.88          | 74    | 808        | 9.93E-16    | 2.05E-13    |
| membrane part                            | 12.47     | 25.83          | 52    | 616        | 2.70E-13    | 4.62E-11    |
| plasma membrane                          | 5.04      | 14.68          | 21    | 350        | 1.18E-11    | 1.90E-09    |
| cell periphery                           | 6.24      | 15.51          | 26    | 370        | 2.92E-10    | 4.31E-08    |
| nucleus                                  | 21.1      | 33             | 88    | 787        | 3.29E-09    | 4.61E-07    |
| intracellular membrane-bounded organelle | 34.53     | 46.96          | 144   | 1120       | 1.14E-08    | 1.52E-06    |
| membrane-bounded organelle               | 34.53     | 46.96          | 144   | 1120       | 1.14E-08    | 1.52E-06    |
| extracellular matrix                     | 0         | 3.35           | 0     | 80         | 1.58E-07    | 1.96E-05    |
| proteinaceous extracellular matrix       | 0         | 3.1            | 0     | 74         | 5.21E-07    | 5.82E-05    |
| extracellular region part                | 1.68      | 6.16           | 7     | 147        | 1.98E-06    | 2.04E-04    |
| chromosomal part                         | 0.96      | 4.07           | 4     | 97         | 5.37E-05    | 3.65E-03    |
| chromosome                               | 1.44      | 4.86           | 6     | 116        | 5.40E-05    | 3.65E-03    |
| cell junction                            | 0.72      | 3.4            | 3     | 81         | 1.41E-04    | 8.45E-03    |
| cell                                     | 66.19     | 73.5           | 276   | 1753       | 1.60E-04    | 9.14E-03    |
| cell part                                | 66.19     | 73.5           | 276   | 1753       | 1.60E-04    | 9.14E-03    |
| extracellular matrix part                | 0         | 1.59           | 0     | 38         | 6.32E-04    | 2.91E-02    |
| chromatin                                | 0.24      | 2.1            | 1     | 50         | 7.13E-04    | 3.20E-02    |
| synapse                                  | 0.24      | 2.1            | 1     | 50         | 7.13E-04    | 3.20E-02    |
| plasma membrane part                     | 2.16      | 5.12           | 9     | 122        | 8.39E-04    | 3.70E-02    |

C) Proteins over-represented in DT40 compared to the *Gallus gallus* SwissProt proteome

| Description                                                                 | Count [%] | Ref. Count [%] | Count | Ref. Count | Raw p-value | FDR p-value |
|-----------------------------------------------------------------------------|-----------|----------------|-------|------------|-------------|-------------|
| ribosome                                                                    | 7.91      | 1.34           | 33    | 32         | <4.90E-324  | <4.90E-324  |
| virion                                                                      | 3.12      | 0.13           | 13    | 3          | <4.90E-324  | <4.90E-324  |
| virion part                                                                 | 3.12      | 0.13           | 13    | 3          | <4.90E-324  | <4.90E-324  |
| viral capsid                                                                | 2.88      | 0.04           | 12    | 1          | <4.90E-324  | <4.90E-324  |
| cytosolic large ribosomal subunit                                           | 1.68      | 0.25           | 7     | 6          | <4.90E-324  | <4.90E-324  |
| proteasome core complex                                                     | 1.68      | 0.13           | 7     | 3          | <4.90E-324  | <4.90E-324  |
| clathrin coat                                                               | 1.2       | 0.13           | 5     | 3          | <4.90E-324  | <4.90E-324  |
| proteasome core complex, alpha-subunit complex                              | 0.96      | 0.08           | 4     | 2          | <4.90E-324  | <4.90E-324  |
| proton-transporting ATP synthase complex, catalytic core F(1)               | 0.96      | 0.04           | 4     | 1          | <4.90E-324  | <4.90E-324  |
| chaperonin-containing T-complex                                             | 0.72      | 0              | 3     | 0          | <4.90E-324  | <4.90E-324  |
| clathrin coat of coated pit                                                 | 0.48      | 0.04           | 2     | 1          | <4.90E-324  | <4.90E-324  |
| clathrin coat of trans-Golgi network vesicle                                | 0.48      | 0              | 2     | 0          | <4.90E-324  | <4.90E-324  |
| clathrin vesicle coat                                                       | 0.48      | 0              | 2     | 0          | <4.90E-324  | <4.90E-324  |
| septin complex                                                              | 0.48      | 0.04           | 2     | 1          | <4.90E-324  | <4.90E-324  |
| trans-Golgi network transport vesicle                                       | 0.48      | 0              | 2     | 0          | <4.90E-324  | <4.90E-324  |
| trans-Golgi network transport vesicle membrane                              | 0.48      | 0              | 2     | 0          | <4.90E-324  | <4.90E-324  |
| fatty acid beta-oxidation multienzyme complex                               | 0.24      | 0              | 1     | 0          | <4.90E-324  | <4.90E-324  |
| mitochondrial fatty acid beta-oxidation multienzyme complex                 | 0.24      | 0              | 1     | 0          | <4.90E-324  | <4.90E-324  |
| mitochondrial proton-transporting ATP synthase complex, catalytic core F(1) | 0.24      | 0              | 1     | 0          | <4.90E-324  | <4.90E-324  |
| perikaryon                                                                  | 0.24      | 0              | 1     | 0          | <4.90E-324  | <4.90E-324  |
| ribonucleoside-diphosphate reductase complex                                | 0.24      | 0              | 1     | 0          | <4.90E-324  | <4.90E-324  |
| ribosomal subunit                                                           | 0.24      | 0              | 1     | 0          | <4.90E-324  | <4.90E-324  |
| signal recognition particle receptor complex                                | 0.24      | 0              | 1     | 0          | <4.90E-324  | <4.90E-324  |
| ribonucleoprotein complex                                                   | 10.07     | 2.98           | 42    | 71         | 1.27E-15    | 8.47E-15    |
| ribosomal subunit                                                           | 3.84      | 0.67           | 16    | 16         | 5.99E-13    | 3.87E-12    |
| cytosolic part                                                              | 4.32      | 1.05           | 18    | 25         | 2.44E-09    | 1.52E-08    |
| cytosol                                                                     | 10.55     | 4.82           | 44    | 115        | 4.54E-08    | 2.76E-07    |
| large ribosomal subunit                                                     | 2.16      | 0.38           | 9     | 9          | 1.42E-07    | 8.34E-07    |
| proteasome complex                                                          | 2.16      | 0.38           | 9     | 9          | 1.42E-07    | 8.34E-07    |
| cytosolic ribosome                                                          | 2.64      | 0.55           | 11    | 13         | 2.32E-07    | 1.34E-06    |
| macromolecular complex                                                      | 29.5      | 20.46          | 123   | 488        | 7.79E-07    | 4.40E-06    |
| cytoplasmic part                                                            | 35.01     | 25.49          | 146   | 608        | 1.14E-06    | 6.41E-06    |
| cytoplasm                                                                   | 52.28     | 42.22          | 218   | 1007       | 3.41E-06    | 1.89E-05    |
| small ribosomal subunit                                                     | 1.68      | 0.29           | 7     | 7          | 4.79E-06    | 2.61E-05    |
| coated membrane                                                             | 1.68      | 0.34           | 7     | 8          | 3.25E-05    | 1.71E-04    |
| membrane coat                                                               | 1.68      | 0.34           | 7     | 8          | 3.25E-05    | 1.71E-04    |
| Golgi-associated vesicle                                                    | 1.2       | 0.21           | 5     | 5          | 1.60E-04    | 8.00E-04    |
| Golgi-associated vesicle membrane                                           | 1.2       | 0.21           | 5     | 5          | 1.60E-04    | 8.00E-04    |
| proton-transporting ATP synthase complex                                    | 0.96      | 0.17           | 4     | 4          | 9.23E-04    | 3.99E-03    |
| vesicle coat                                                                | 0.96      | 0.17           | 4     | 4          | 9.23E-04    | 3.99E-03    |
| intracellular non-membrane-bounded organelle                                | 21.58     | 16.44          | 90    | 392        | 1.47E-03    | 6.21E-03    |
| non-membrane-bounded organelle                                              | 21.58     | 16.44          | 90    | 392        | 1.47E-03    | 6.21E-03    |
| proton-transporting two-sector ATPase complex                               | 1.68      | 0.5            | 7     | 12         | 1.68E-03    | 7.07E-03    |
| coated vesicle membrane                                                     | 1.44      | 0.42           | 6     | 10         | 3.08E-03    | 1.28E-02    |
| coated vesicle                                                              | 1.68      | 0.55           | 7     | 13         | 3.10E-03    | 1.29E-02    |
| proton-transporting two-sector ATPase complex, catalytic domain             | 0.96      | 0.21           | 4     | 5          | 3.98E-03    | 1.61E-02    |
| AP-type membrane coat adaptor complex                                       | 0.72      | 0.13           | 3     | 3          | 5.31E-03    | 2.06E-02    |
| clathrin adaptor complex                                                    | 0.72      | 0.13           | 3     | 3          | 5.31E-03    | 2.06E-02    |
| COPI coated vesicle membrane                                                | 0.72      | 0.13           | 3     | 3          | 5.31E-03    | 2.06E-02    |
| COPI-coated vesicle                                                         | 0.72      | 0.13           | 3     | 3          | 5.31E-03    | 2.06E-02    |
| phosphopyruvate hydratase complex                                           | 0.72      | 0.13           | 3     | 3          | 5.31E-03    | 2.06E-02    |
| cytoskeletal part                                                           | 9.35      | 6.37           | 39    | 152        | 5.70E-03    | 2.18E-02    |

**Supplemental Fig. S3.** Non-specific binding proteins associated with  $\geq 2$  of 4 affinity resins: FLAG, Talon, Calmodulin and IgG sepharose. *A)* Pie chart showing GO\_Cellular component annotation. *B)* GO\_Molecular function annotation and *C)* Kegg pathway analysis. ‘Other’ represents proteins other categories with single protein entries. Data analysed using ProteinCenter. *D)* Overlap of proteins identified as top 150 abundant and the top 150 beadome.

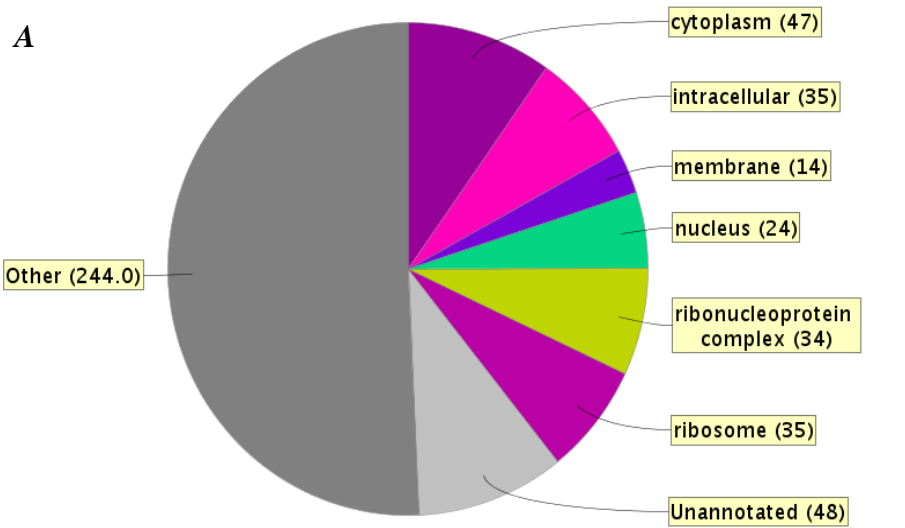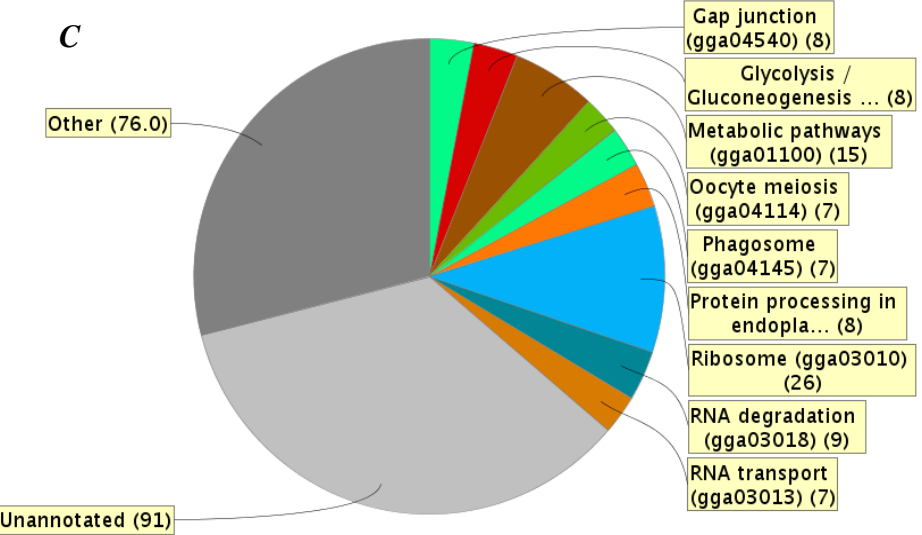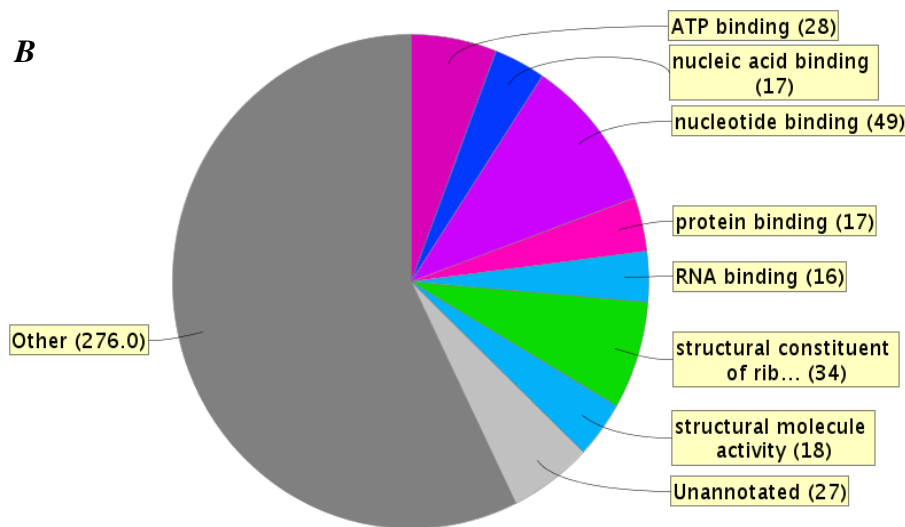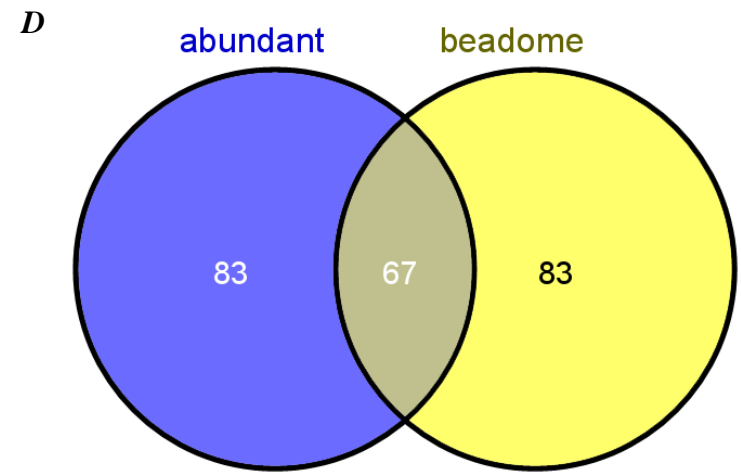



**Supplemental Fig. S5. A.** Fanconi anemia complementation group C *Gallus gallus* UniprotKB accessions alignment with peptides identified in both Calmodulin and IgG pulldowns replicate SILAC-iPAC screenings highlighted in green and IgG only in orange.

|     |                                                                  |     |              |
|-----|------------------------------------------------------------------|-----|--------------|
| 1   | MAQDTTVPKLNFKFWLDKAI EWGQDTTLESQKDVCLHLPQLQEFLHQTYETLKH MNSIAA   | 60  | Q5F3H0       |
| 1   | MAQDTTVPKLNFKFWLDKAI EWGQATTLESQKDVCLHLPQLQEFLHQTYETLKH MNSIAA   | 60  | Q60GM0       |
| 1   | MAQDTTVPKLNFKFWLDKAI EWGQATTLESQKDVCLHLPQLQEFLHQTYETLKH MNSIAA   | 60  | F1NYH1       |
|     | *****                                                            |     |              |
| 61  | IQQFPLIGQLLGRCLCWNPFVVG YDESQKTLMWCLCCLYSSE PQNPVELKANSWIRSL LCH | 120 | Q5F3H0       |
| 61  | IQQFPLIGQLLGRCLCWNPFVVG YDESQKTLMWCLCCLYSSE PQNPVELKANSWIRSL LCH | 120 | Q60GM0       |
| 61  | IQQFPLIGQLLGRCLCWNPFVVG YDESQKTLMWCLCCLYSSE PQNPVELKANSWIRSL LCH | 120 | F1NYH1       |
|     | *****                                                            |     |              |
| 121 | LLSSSKWERIEAETSTFISALGYTSADYYCHLVENIVSSLVTELRNQFNELNIQERISV      | 180 | Q5F3H0       |
| 121 | LLSSSKWERIEAETSTFISALGYTSADYYCHLVENIVSSLVTELRNQFNELNIQERISV      | 180 | Q60GM0       |
| 121 | LLSSSKWERIEAETSTFISALGYTSADYYCHLVENIVSSLVTELRNQFNELNIQERISV      | 180 | F1NYH1       |
|     | *****                                                            |     |              |
| 181 | SRVNAVSLFCLPLITLTPDLT PPLETLLLYHGGASKEILSSEFLEAVNDAVLK KKIISLSES | 240 | Q5F3H0       |
| 181 | SRVNAVSLFCLPLITLTPDLT PPLETLLLYHGGASKEILSSEFLEAVNDAVLK KKIISLSES | 240 | Q60GM0       |
| 181 | SRVNAVSLFCLPLITLTPDLT PPLETLLLYHGGASKEILSSEFLEAVNDAVLK KKIISLSES | 240 | F1NYH1       |
|     | *****                                                            |     |              |
| 241 | AIFSLWHRHLP SLESATLSLLDQ L TSLQINSLEKVACVIKDSLLPQAASHPAIFRIVNEI  | 300 | Q5F3H0       |
| 241 | AIFSLWHRHLP SLESATLSLLDQ L TSLQINSLEKVACVIKDSLLPQAASHPAIFRIVNEI  | 300 | Q60GM0       |
| 241 | AIFSLWHRHLP SLESATLSLLDQ L TSLQINSLEKVACVIKDSLLPQAASHPAIFRIVNEI  | 300 | F1NYH1       |
|     | *****                                                            |     |              |
| 301 | FKNALLETDGAPEVMTIIQVFIQLFIQVQQNENKQHKFPLKAYFPHHQPLVIAL LRRPF     | 360 | Q5F3H0       |
| 301 | FKNALLETDGAPEVMTIIQVFIQLFIQVQQNENKQHKFPLKAYFPHHQPLVIAL LRRPF     | 360 | Q60GM0       |
| 301 | FKNALLETDGAPEVMTIIQVFIQLFIQVQQNENKQHKFPLKAYFPHHQPLVIAL LRRPF     | 360 | F1NYH1       |
|     | *****                                                            |     |              |
| 361 | ELPSTHWLQHLKHISDTLKSIVEDTNVSSFADLYEIWFLVACFGEWLDIAAEQLMKAAVA     | 420 | Q5F3H0       |
| 361 | ELPSTHWLQHLKHISDTLKSIVEDTNVSSFADLYEIWFLVACFGEWLG YCTKQLMKAAVA    | 420 | Q60GM0       |
| 361 | ELPSTHWLQHLKHISDTLKSIVEDTNVSSFADLYEIWFLVACFGEWLDIAAEQLMKAAVA     | 420 | F1NYH1       |
|     | ***** . : : *****                                                |     |              |
| 421 | PDALLWLLAFYYCPQENQQR TQTMVESQAVYSRLMMLYNRTVLSFGDLQASVNNAADTE     | 480 | Q5F3H0       |
| 421 | PDALLWLLAFYYCPQENQQR TQTMVESQAVYSRLMMLYNRTVLSFGDLQASVNNAADTE     | 480 | Q60GM0       |
| 421 | PDALLWLLAFYYCPQENQQR TQTMVESQAVYSRLMMLYNRTVLSFGDLQASVNNAADTE     | 480 | F1NYH1       |
|     | *****                                                            |     |              |
| 481 | QCHTQCLITHLLTNFLLFSSGGHMIAQEFISHITETTDM SKEVCSLLIRTAYRIKHNGGE    | 540 | Q5F3H0       |
| 481 | QCHTQCLITHLLTNFLLFSSGGHMIAQEFISHITETTDM SKEVCSLLIRTAYRIKHNGGE    | 540 | Q60GM0       |
| 481 | QCHTQCLITHLLTNFLLFSSGGHMIAQEFISHITETTDM SKEVCSLLIRTAYRIKHNGGE    | 540 | F1NYH1       |
|     | *****                                                            |     |              |
| 541 | NQRTVKLLNELLQKLAVEV                                              | 559 | Q5F3H0       |
| 541 | NQRTVKLLNELLQKLAVEV                                              | 559 | Q60GM0       |
| 541 | NQRTVKLLNELLQKLAVEV                                              | 559 | F1NYH1       |
|     | *****                                                            |     |              |
|     |                                                                  |     | Q5F3H0_CHICK |
|     |                                                                  |     | Q60GM0_CHICK |
|     |                                                                  |     | F1NYH1_CHICK |



**Supplemental Fig. S6.** Expanded PIP4Kin2 STRING network (+10) to identify potential missing interactors in our lists

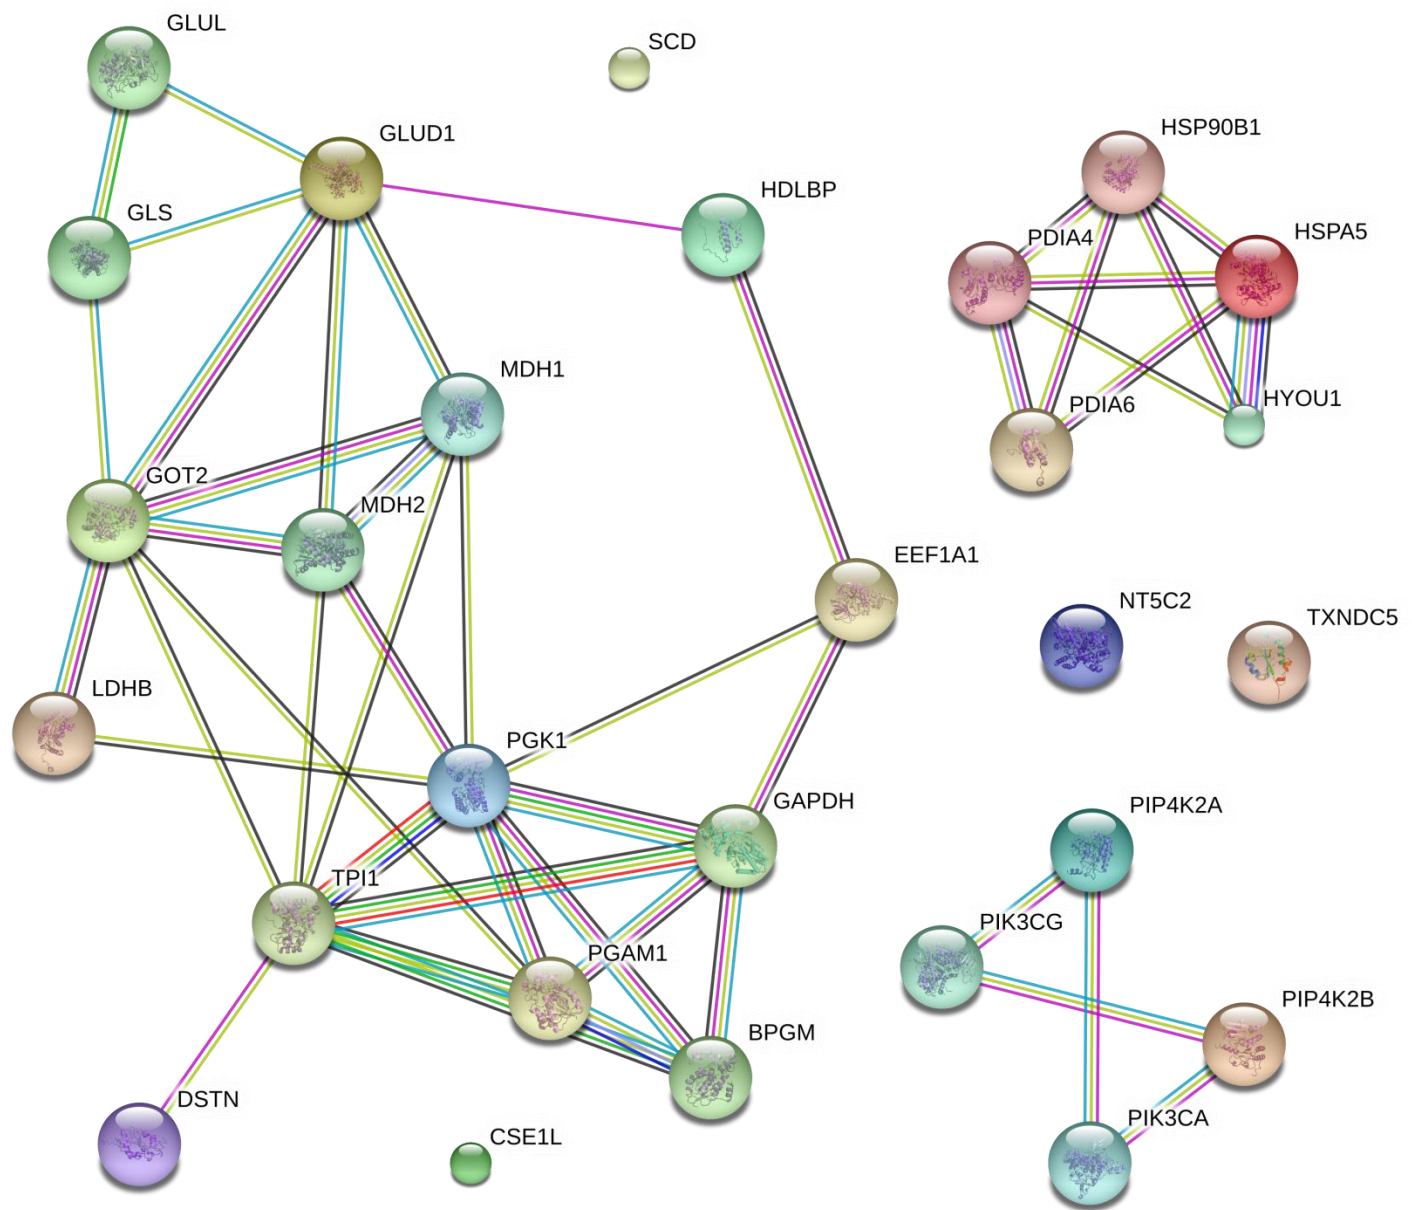

- Key**
- Neighborhood
  - Gene Fusion
  - Cooccurrence
  - Coexpression
  - Experiments
  - Databases
  - Textmining
  - [Homology]

**Supplemental Fig. S7. All TALON interactors based on experimental evidence only.**

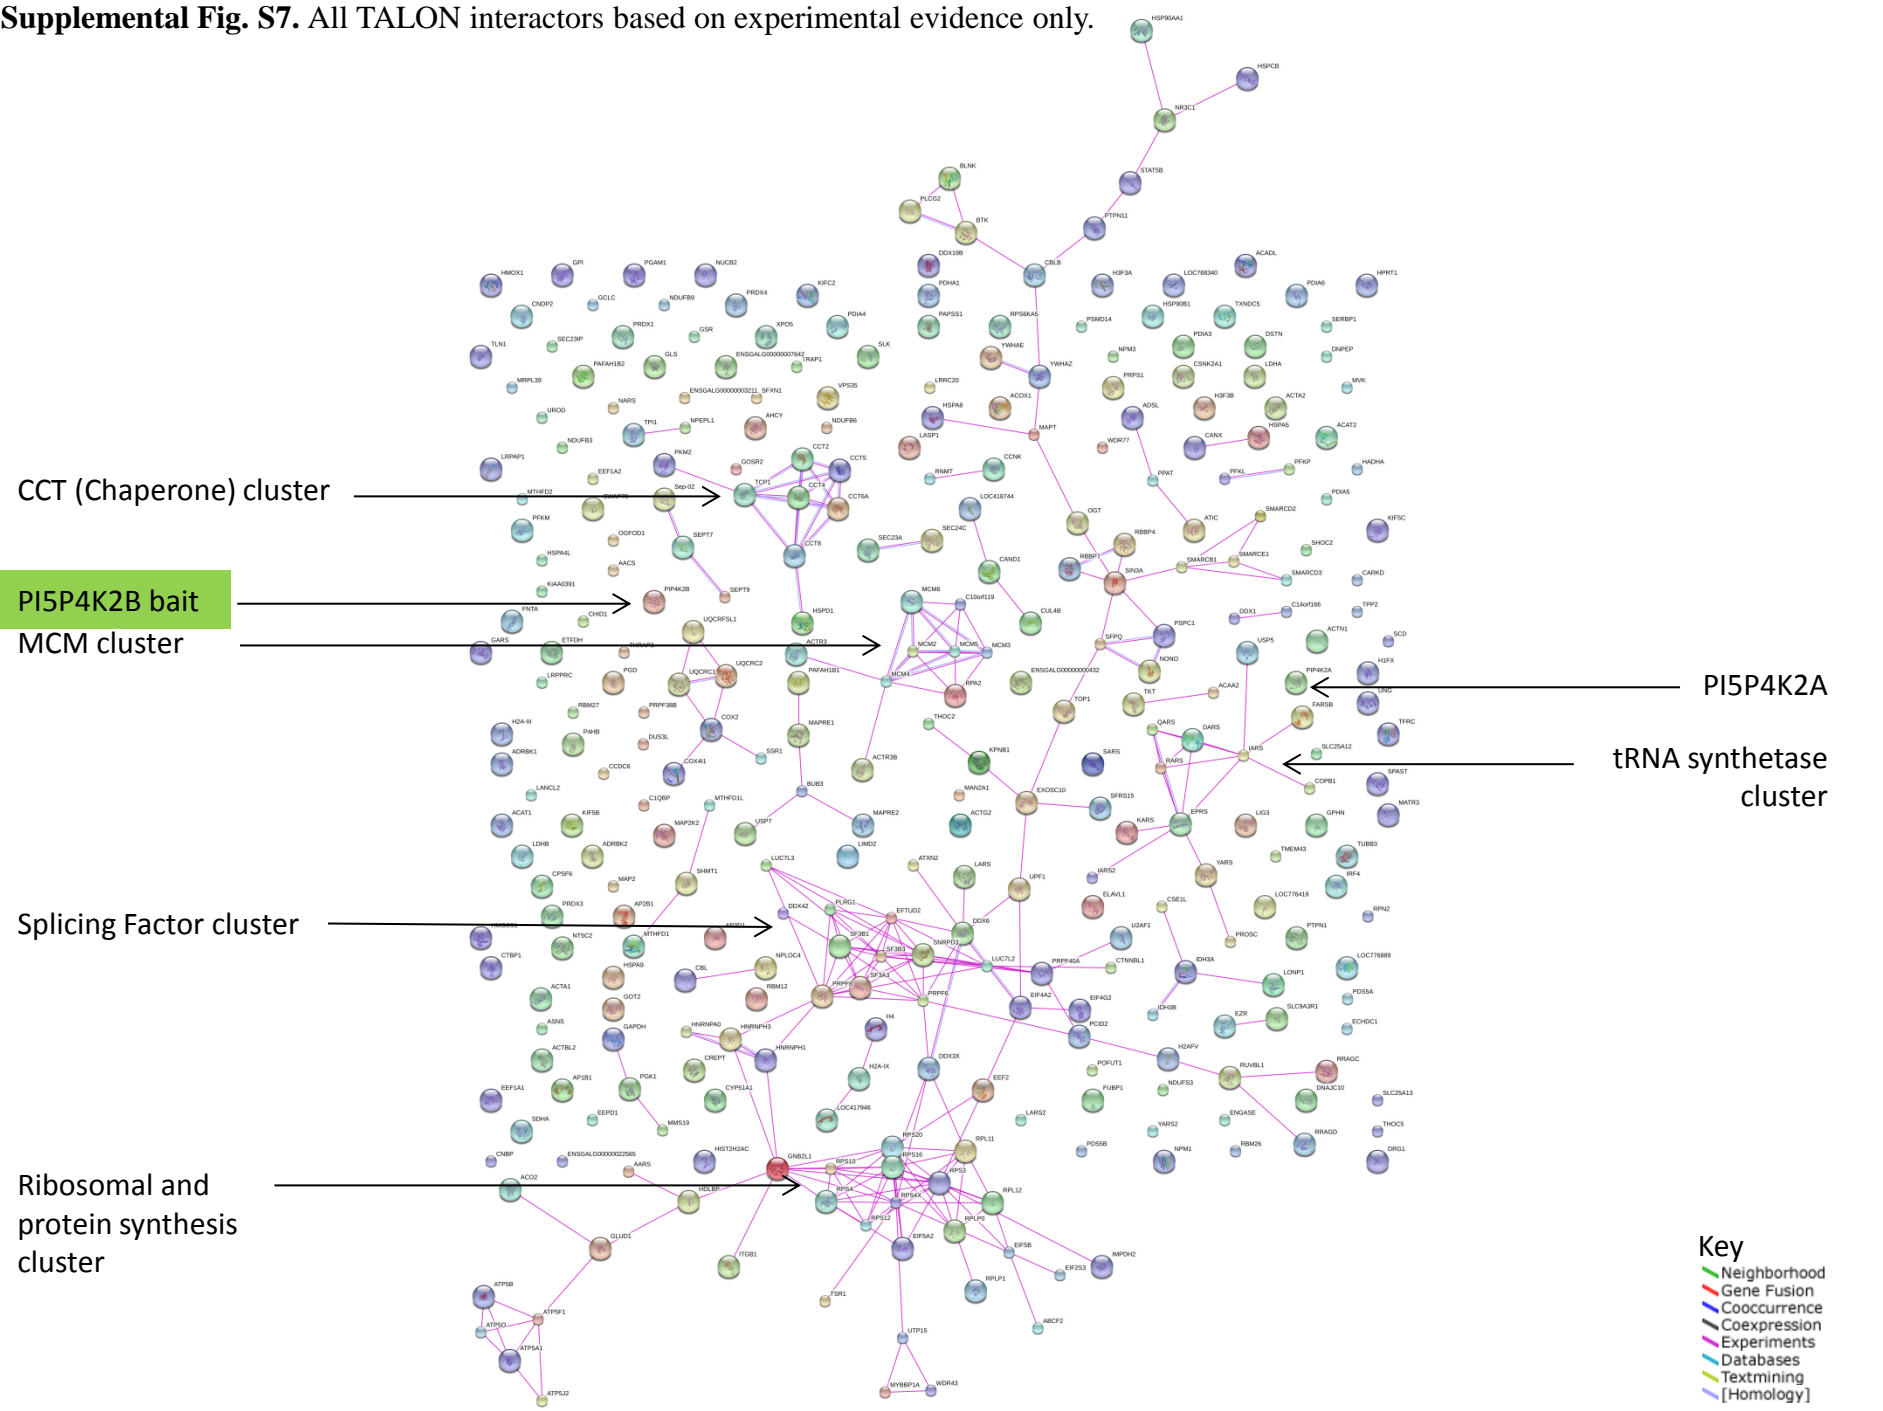

**Supplemental Fig. S8.** All FLAG interactors based on experimental evidence only.

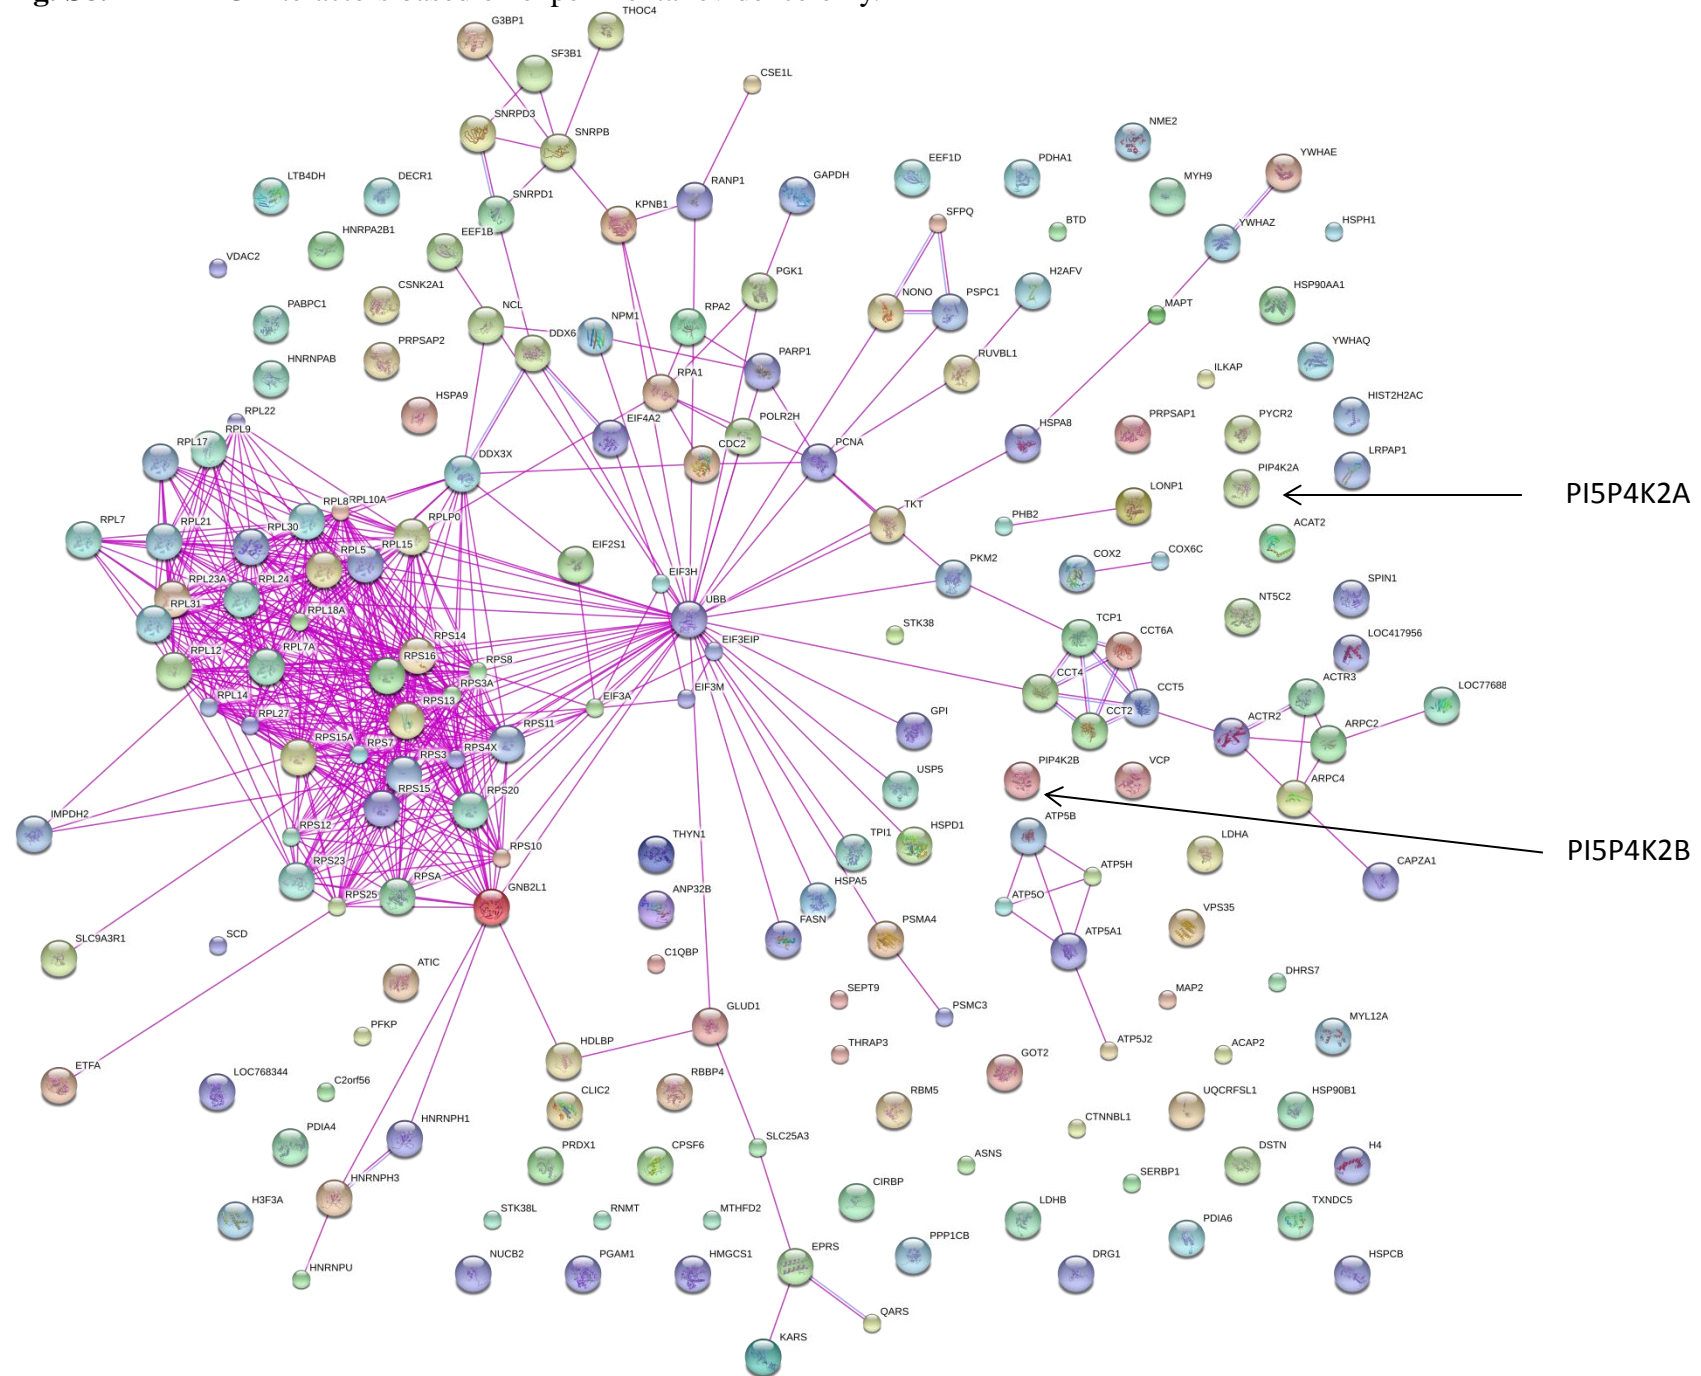

- Key**
- Neighborhood
  - Gene Fusion
  - Cooccurrence
  - Coexpression
  - Experiments
  - Databases
  - Textmining
  - [Homology]
