# Supplementary material for: SILAC-iPAC: A quantitative method for distinguishing genuine from non-specific components of protein complexes by parallel affinity capture
Source: PubMed Central journal article supplement (PMC4329988; doi:10.1016/j.jprot.2014.12.006), 2015-02-06
Supplement: mmc2.pdf [file mmc2.pdf]

**Supplemental Table S1A** . Top 150 abundant DT40 proteins from 3 LC-MS/MS runs ranked by calculated emPAI score.

| UNIPROT KB | GENE     | MASCOT SCORE | AVERAGE | EMPAI AVERAGE | EMPAI CALC AVERAGE | UNIQUE PEPTIDES | UNIQUE PEPTIDE SEQS | % SEQUENCE COVERAGE                                         | DESCRIPTION |
|------------|----------|--------------|---------|---------------|--------------------|-----------------|---------------------|-------------------------------------------------------------|-------------|
| O42283     | HSPE1    | 263          | 2.87    | 9.00          | 10                 | 10              | 85.29               | Heat shock protein 10                                       |             |
| G1K342     | TUBB2C   | 2613         | 7.13    | 7.91          | 33                 | 21              | 66.29               | Uncharacterized protein                                     |             |
| P09244     | TUBB     | 2992         | 8.32    | 7.91          | 33                 | 22              | 72.52               | Tubulin beta-7 chain                                        |             |
| Q5ZLN1     | PGAM1    | 1267         | 4.66    | 7.25          | 14                 | 12              | 71.26               | Phosphoglycerate mutase 1                                   |             |
| Q6EE57     | RPS8     | 408          | 1.69    | 6.94          | 12                 | 12              | 60.32               | 40S ribosomal protein S8                                    |             |
| P53478     | ACTG1    | 2139         | 10.18   | 6.74          | 29                 | 22              | 66.22               | Actin, cytoplasmic type 5                                   |             |
| Q90705     | EEF2     | 2925         | 3.21    | 6.74          | 56                 | 50              | 66.55               | Elongation factor 2                                         |             |
| P51913     | ENO1     | 7909         | 8.12    | 6.59          | 29                 | 26              | 63.82               | Alpha-enolase                                               |             |
| B4ZAD9     | EEF2     | 530          | 2.73    | 6.20          | 17                 | 14              | 72.34               | Eukaryotic translation elongation factor 2                  |             |
| P11501     | HSP90AA1 | 3043         | 4.35    | 5.81          | 51                 | 45              | 57.01               | Heat shock protein HSP 90-alpha                             |             |
| P00356     | GAPDH    | 1741         | 5.37    | 5.49          | 25                 | 16              | 59.76               | glyceraldehyde-3-phosphate dehydrogenase                    |             |
| Q9IAY5     | SDOS     | 609          | 2.06    | 5.49          | 13                 | 13              | 45.00               | protein syndesmos precursor                                 |             |
| Q5ZLQ6     | YWHAB    | 989          | 2.86    | 5.31          | 15                 | 14              | 59.84               | 14-3-3 protein beta/alpha                                   |             |
| P00340     | LDHA     | 2790         | 8.44    | 4.93          | 29                 | 21              | 78.61               | L-lactate dehydrogenase A chain                             |             |
| Q5ZL72     | HSPD1    | 2410         | 4.36    | 4.74          | 33                 | 27              | 57.77               | 60 kDa heat shock protein, mitochondrial                    |             |
| O57535     | NME2     | 531          | 9.02    | 4.62          | 11                 | 9               | 74.51               | Nucleoside diphosphate kinase                               |             |
| P09203     | TUB1C    | 2232         | 4.92    | 4.62          | 26                 | 17              | 54.38               | Tubulin beta-1 chain                                        |             |
| Q6EE60     | RPL18    | 281          | 1.68    | 4.62          | 7                  | 7               | 46.39               | 60S ribosomal protein L18                                   |             |
| Q98TF8     | RPL22    | 271          | 0.51    | 4.62          | 4                  | 4               | 26.56               | 60S ribosomal protein L22                                   |             |
| P00337     | LDHB     | 946          | 2.65    | 4.46          | 17                 | 17              | 61.56               | L-lactate dehydrogenase B chain                             |             |
| P42558     | RAN      | 296          | 1.45    | 4.34          | 8                  | 8               | 42.59               | GTP-binding nuclear protein Ran                             |             |
| A3RL83     | ANP32B   | 292          | 0.97    | 4.01          | 9                  | 9               | 30.38               | Lectin-associated matrix protein                            |             |
| E1C2A1     | ANP32A   | 274          | 0.98    | 4.01          | 9                  | 9               | 36.30               | Acidic leucine-rich nuclear phosphoprotein 32 family member |             |
| O73885     | HSPA8    | 2295         | 3.24    | 3.98          | 33                 | 30              | 52.79               | Heat shock cognate 71 kDa protein                           |             |
| Q5ZKC9     | YWHAZ    | 1100         | 2.86    | 3.87          | 15                 | 14              | 53.06               | 14-3-3 protein zeta                                         |             |
| P63247     | GNB2L1   | 690          | 1.44    | 3.83          | 15                 | 15              | 47.95               | Guanine nucleotide-binding protein subunit beta-2-like 1    |             |
| Q5ZMN3     | PHB2     | 438          | 0.94    | 3.81          | 19                 | 18              | 57.81               | Prohibitin-2                                                |             |
| P00940     | TPI1     | 465          | 2.22    | 3.64          | 11                 | 11              | 64.11               | Triosephosphate isomerase                                   |             |
| P04210     | L1CHV    | 266          | 1.27    | 3.64          | 4                  | 4               | 54.72               | Ig lambda chain V-1 region                                  |             |
| Q5ZKK8     | RPL19    | 26           | 0.14    | 3.64          | 8                  | 8               | 35.20               | Ribosomal protein L19                                       |             |
| Q5ZLC5     | ATP5B    | 1662         | 2.67    | 3.64          | 28                 | 22              | 59.29               | ATP synthase subunit beta, mitochondrial                    |             |
| Q5ZMD1     | YWHAQ    | 537          | 1.74    | 3.64          | 12                 | 11              | 44.49               | 14-3-3 protein theta                                        |             |
| Q5ZMT0     | YWHAE    | 837          | 3.05    | 3.64          | 15                 | 14              | 48.63               | 14-3-3 protein epsilon                                      |             |
| Q90ZG0     | FKBP1A   | 42           | 0.66    | 3.64          | 2                  | 2               | 25.00               | Peptidyl-prolyl cis-trans isomerase                         |             |
| Q5ZJU3     | ASNS     | 885          | 1.10    | 3.52          | 20                 | 19              | 40.29               | Asparagine synthetase [glutamine-hydrolyzing]               |             |
| Q8JFP1     | EIF4A2   | 857          | 1.99    | 3.49          | 19                 | 19              | 47.67               | Eukaryotic initiation factor 4A-II                          |             |
| F2Z4K7     | RPS3A    | 143          | 1.08    | 3.44          | 15                 | 14              | 50.76               | Uncharacterized protein                                     |             |
| Q90835     | EEF1A1   | 799          | 2.12    | 3.44          | 16                 | 15              | 38.96               | Elongation factor 1-alpha 1                                 |             |
| P47836     | RPS4X    | 373          | 3.39    | 3.28          | 17                 | 16              | 53.23               | 40S ribosomal protein S4                                    |             |
| Q5ZJC1     | RPS3     | 358          | 1.26    | 3.28          | 13                 | 13              | 54.51               | Putative uncharacterized protein                            |             |
| P79781     | RPS27A   | 235          | 0.97    | 3.22          | 7                  | 6               | 36.54               | Ubiquitin-40S ribosomal protein S27a                        |             |
| Q90694     | CDC42    | 80           | 1.37    | 3.22          | 5                  | 5               | 32.46               | Cell division control protein 42 homolog                    |             |
| F1N9J7     | TUBA3E   | 1164         | 1.74    | 3.16          | 17                 | 15              | 41.78               | PREDICTED: tubulin alpha-1C chain                           |             |
| Q9I9V6     | GAG      | 193          | 0.47    | 3.12          | 8                  | 7               | 26.42               | Gag polyprotein                                             |             |
| P00548     | PKM2     | 2455         | 3.64    | 3.08          | 30                 | 24              | 56.79               | Pyruvate kinase muscle isozyme                              |             |
| P47826     | RPLP0    | 998          | 2.02    | 3.08          | 11                 | 11              | 49.68               | 60S acidic ribosomal protein P0                             |             |
| P68034     | ACTC1    | 927          | 3.18    | 3.08          | 19                 | 15              | 35.81               | Actin, alpha cardiac muscle 1                               |             |
| F1P1A5     | TKT      | 735          | 1.20    | 2.98          | 22                 | 21              | 36.36               | PREDICTED: transketolase                                    |             |

|        |                  |      |      |      |    |    |       |                                                        |
|--------|------------------|------|------|------|----|----|-------|--------------------------------------------------------|
| P02552 | TUBA1C           | 806  | 2.47 | 2.98 | 6  | 6  | 40.56 | Tubulin alpha-1 chain                                  |
| Q5ZJ56 | RPL7             | 66   | 0.93 | 2.98 | 11 | 9  | 38.62 | 60S ribosomal protein L7                               |
| Q9I9V5 | GAG              | 258  | 2.08 | 2.98 | 8  | 7  | 33.89 | Gag polyprotein                                        |
| Q9I9V7 | GAG              | 215  | 1.39 | 2.98 | 8  | 7  | 33.89 | Gag polyprotein                                        |
| D5M8S3 | PHB              | 350  | 0.88 | 2.87 | 11 | 11 | 52.94 | Prohibitin transcript variant 2                        |
| P15771 | NCL              | 1184 | 1.15 | 2.86 | 28 | 25 | 35.73 | nucleolin/C23                                          |
| D0EKR3 | PPIA             | 528  | 5.56 | 2.83 | 13 | 9  | 44.24 | Peptidyl-prolyl cis-trans isomerase                    |
| F1NGS7 | ARF4             | 94   | 0.83 | 2.83 | 7  | 7  | 40.56 | Uncharacterized protein                                |
| P09653 | TUBB6            | 938  | 1.14 | 2.79 | 19 | 12 | 33.41 | Tubulin beta-5 chain                                   |
| Q5F424 | CCT2             | 1070 | 1.57 | 2.76 | 26 | 22 | 52.52 | Uncharacterized protein                                |
| O93466 | RAC3             | 104  | 0.33 | 2.73 | 6  | 6  | 26.04 | GTPase cRac1B                                          |
| Q6EE31 | CCT8             | 710  | 1.91 | 2.73 | 28 | 24 | 46.53 | T-complex protein 1 subunit theta                      |
| Q9W7I5 | RBBP4            | 157  | 0.31 | 2.73 | 8  | 8  | 19.29 | Histone-binding protein RBBP4                          |
| P38024 | PAICS            | 747  | 0.95 | 2.67 | 18 | 15 | 45.77 | Multifunctional protein ADE2                           |
| Q5ZJK8 | CCT7             | 1323 | 1.45 | 2.65 | 23 | 20 | 45.03 | T-complex protein 1 subunit eta                        |
| P51903 | PGK1             | 774  | 2.57 | 2.63 | 19 | 17 | 47.00 | Phosphoglycerate kinase                                |
| P20763 |                  | 134  | 0.50 | 2.59 | 5  | 5  | 40.37 | Ig lambda chain C region                               |
| Q6ITC7 | RPS13            | 44   | 0.43 | 2.59 | 5  | 5  | 39.74 | 40S ribosomal protein S13                              |
| Q6SVA6 | RPSA             | 269  | 0.62 | 2.59 | 7  | 7  | 33.77 | DMRT1 isoform e                                        |
| P09652 | TUBB3            | 1518 | 2.10 | 2.55 | 20 | 12 | 32.96 | Tubulin beta-4 chain                                   |
| Q6JAY6 | GAG              | 197  | 1.55 | 2.51 | 7  | 7  | 26.27 | Gag polyprotein                                        |
| Q9PTD6 | RPS6             | 105  | 0.56 | 2.51 | 8  | 7  | 35.22 | 40S ribosomal protein S6                               |
| Q9I9V4 | GAG              | 379  | 1.54 | 2.46 | 12 | 9  | 30.83 | Gag polyprotein                                        |
| Q90679 | THYN1            | 103  | 0.75 | 2.38 | 9  | 9  | 43.80 | Thymocyte nuclear protein 1                            |
| Q9DEA3 | PCNA             | 194  | 1.37 | 2.38 | 12 | 10 | 45.80 | Proliferating cell nuclear antigen                     |
| Q8UVX3 | ATP5A1           | 1216 | 1.22 | 2.27 | 17 | 17 | 38.34 | ATP synthase subunit alpha                             |
| Q5ZL53 | PABPC1           | 422  | 0.80 | 2.27 | 21 | 20 | 35.32 | Putative uncharacterized protein                       |
| Q04619 | HSP90AB1         | 966  | 0.92 | 2.26 | 27 | 26 | 33.38 | Heat shock cognate protein HSP 90-beta                 |
| F1NG87 | TTC28            | 24   |      | 2.16 | 3  | 3  | 26.09 | similar to OTTHUMP00000028696                          |
| F1P3F1 | AHCY             | 456  | 0.70 | 2.16 | 14 | 13 | 39.26 | adenosylhomocysteinase                                 |
| H9KZC8 | PA2G4            | 191  | 1.09 | 2.16 | 13 | 13 | 42.27 | similar to proliferation-associated protein 1, partial |
| O42388 | UBA52            | 129  | 0.51 | 2.16 | 5  | 4  | 25.78 | Ubiquitin-ribosomal protein fusion protein             |
| P16039 | NPM1             | 224  | 0.62 | 2.16 | 11 | 11 | 34.01 | Nucleophosmin                                          |
| P18359 | DSTN             | 354  | 2.72 | 2.16 | 7  | 6  | 44.85 | Destrin                                                |
| P18660 | RPLP1            | 63   | 0.30 | 2.16 | 1  | 1  | 14.04 | 60S acidic ribosomal protein P1                        |
| P53449 | ALDOC            | 486  | 1.86 | 2.16 | 4  | 3  | 35.04 | Fructose-bisphosphate aldolase C                       |
| Q02960 | MIF              | 107  | 1.05 | 2.16 | 5  | 4  | 34.78 | Macrophage migration inhibitory factor                 |
| Q5F3R9 | SET              | 136  | 0.48 | 2.16 | 5  | 5  | 28.16 | Putative uncharacterized protein                       |
| Q5ZHW8 | RPS14            | 200  | 0.45 | 2.16 | 4  | 4  | 28.48 | Uncharacterized protein                                |
| Q5ZL59 | UBE2D3           | 59   | 0.20 | 2.16 | 2  | 2  | 23.81 | Uncharacterized protein                                |
| Q6EE59 | RPL4             | 184  | 0.64 | 2.16 | 8  | 8  | 35.36 | Ribosomal protein L4                                   |
| Q6EE62 | RPL10A           | 66   | 0.35 | 2.16 | 5  | 5  | 28.80 | Ribosomal protein                                      |
| Q6JAX8 | GAG              | 163  | 1.26 | 2.16 | 7  | 7  | 26.27 | Gag polyprotein                                        |
| P09102 | P4HB, PDI, PDIA1 | 395  | 0.39 | 2.05 | 18 | 18 | 38.21 | protein disulfide isomerase                            |
| Q5F411 | CCT5             | 678  | 0.53 | 2.05 | 19 | 18 | 32.72 | Uncharacterized protein                                |
| F6R1X6 | SSB              | 205  | 0.41 | 2.03 | 18 | 18 | 43.56 | Sjogren syndrome antigen B (autoantigen La) isoform 1  |
| Q5ZIQ3 | HNRPK            | 203  | 0.22 | 2.02 | 11 | 11 | 35.83 | Heterogeneous nuclear ribonucleoprotein K              |
| F1NGA2 | ATP5A1W          | 843  | 1.12 | 2.01 | 11 | 11 | 32.40 | ATP synthase alpha subunit                             |
| P08110 | HSP90B1, TRA1    | 449  | 0.32 | 1.99 | 22 | 22 | 26.67 | Endoplasmic                                            |
| Q5F470 | RAB8A            | 33   | 0.30 | 1.93 | 7  | 7  | 40.10 | Ras-related protein Rab-8A                             |
| Q9W744 | DDX5             | 270  | 0.27 | 1.93 | 17 | 16 | 27.39 | DEAD-box RNA helicase                                  |
| Q03853 | SE21Q1b          | 649  | 0.98 | 1.91 | 19 | 15 | 28.67 | Gag protein                                            |
| Q8UWG7 | RPL6             | 84   | 0.32 | 1.89 | 7  | 7  | 22.82 | 60S ribosomal protein L6                               |
| Q9I9V2 | GAG              | 365  | 1.18 | 1.89 | 10 | 7  | 26.94 | Gag polyprotein                                        |
| Q5F4A4 | IMPDH2           | 438  | 0.67 | 1.87 | 17 | 17 | 37.55 | Inosine-5'-monophosphate dehydrogenase                 |
| H9L011 | LOC426023        | 126  | 0.57 | 1.85 | 5  | 5  | 32.12 | nuclear poly(C)-binding protein, splicevariant E       |

|        |           |      |      |      |    |    |       |                                                               |
|--------|-----------|------|------|------|----|----|-------|---------------------------------------------------------------|
| F1NXW3 | RPS15A    | 127  | 1.78 | 1.85 | 8  | 7  | 42.31 | 40S ribosomal protein S15a isoform 1                          |
| P41125 | RPL13     | 126  | 0.67 | 1.85 | 7  | 7  | 28.44 | 60S ribosomal protein L13                                     |
| Q5ZKJ3 | DUT       | 134  | 0.68 | 1.85 | 5  | 5  | 30.72 | Uncharacterized protein                                       |
| Q6JAY3 | GAG       | 220  | 1.55 | 1.85 | 8  | 7  | 33.86 | Gag polyprotein                                               |
| P09207 | TUBB1     | 628  | 0.76 | 1.82 | 15 | 10 | 24.44 | Tubulin beta-6 chain                                          |
| Q03852 | RAV-0     | 703  | 1.25 | 1.81 | 19 | 15 | 29.10 | Gag protein                                                   |
| P51417 | RPL15     | 74   | 0.90 | 1.78 | 6  | 6  | 42.42 | 60S ribosomal protein L15                                     |
| Q5F4A3 | ANP32E    | 113  | 0.54 | 1.78 | 4  | 4  | 19.92 | Acidic leucine-rich nuclear phosphoprotein 32 family member   |
| Q5ZJ54 | CCT6A     | 852  | 0.64 | 1.78 | 14 | 13 | 31.51 | T-complex protein 1 subunit zeta                              |
| Q5ZME2 | MDH1      | 91   | 0.19 | 1.78 | 10 | 9  | 30.54 | Malate dehydrogenase, cytoplasmic                             |
| Q9DDH7 | ATP5A1    | 217  | 1.13 | 1.78 | 4  | 4  | 39.09 | ATP synthase alpha subunit                                    |
| O93382 | GDI2      | 746  | 0.99 | 1.75 | 15 | 13 | 39.06 | Rab-GDP dissociation inhibitor                                |
| H9KZF8 | ATP5C1    | 50   | 0.47 | 1.68 | 6  | 6  | 22.87 | similar to ATP synthase, H+ transporting, mitochondrial F1 co |
| P00508 | GOT2      | 494  | 0.60 | 1.68 | 16 | 16 | 37.59 | Aspartate aminotransferase, mitochondrial                     |
| Q6EE30 | EEF1G     | 401  | 0.89 | 1.68 | 11 | 11 | 24.77 | Eukaryotic translation elongation factor 1                    |
| Q5ZMU3 | GPI       | 712  | 0.85 | 1.65 | 18 | 16 | 28.93 | Glucose-6-phosphate isomerase                                 |
| Q5ZIX2 | ETFA      | 191  | 0.29 | 1.64 | 8  | 8  | 30.92 | Putative uncharacterized protein                              |
| P49702 | ARF5      | 103  | 0.58 | 1.61 | 5  | 5  | 31.11 | ADP-ribosylation factor 5                                     |
| Q5ZJX9 | PSMA5     | 29   | 0.42 | 1.61 | 5  | 5  | 23.24 | Proteasome subunit alpha type                                 |
| Q5ZMT1 | ARHGDI    | 152  | 0.71 | 1.61 | 5  | 4  | 38.24 | Putative uncharacterized protein                              |
| Q90WA6 | HSP90B1   | 449  | 0.33 | 1.60 | 20 | 20 | 24.03 | Heat shock protein 108                                        |
| E1C4M0 | RPS2      | 290  | 1.64 | 1.51 | 10 | 10 | 29.53 | 40S ribosomal protein S2                                      |
| H9L366 | IDH2      | 45   | 0.42 | 1.51 | 2  | 2  | 50.67 | hypothetical protein LOC431056                                |
| D0VX32 | UQCRCQ    | 40   | 0.35 | 1.51 | 2  | 2  | 28.24 | Mitochondrial ubiquinol-cytochrome c reductase ubiquinone-    |
| P09643 | TUBA4A    | 2112 | 1.60 | 1.51 | 9  | 7  | 25.16 | Tubulin alpha-4 chain                                         |
| Q5ZI56 | RPL11     | 199  | 0.52 | 1.51 | 5  | 5  | 26.53 | Putative uncharacterized protein                              |
| F1NSQ1 | AIMP2     | 82   | 0.11 | 1.42 | 6  | 6  | 29.89 | multisynthetase complex p38 auxiliary component               |
| E1BYW9 | PSMB3     | 243  | 0.14 | 1.37 | 3  | 3  | 20.00 | Proteasome subunit beta type                                  |
| H9L132 | LOC772076 | 35   |      | 1.37 | 3  | 3  | 24.86 | Uncharacterized protein                                       |
| F1NJF0 | C1QBP     | 71   | 0.25 | 1.37 | 3  | 3  | 17.55 | p32 subunit of splicing factor SF2                            |
| P31335 | ATIC      | 212  | 0.34 | 1.37 | 14 | 14 | 30.02 | Bifunctional purine biosynthesis protein PURH                 |
| P43347 | TPT1      | 52   | 0.61 | 1.37 | 4  | 3  | 17.44 | Translationally-controlled tumor protein homolog              |
| Q5F3J5 | PSME3     | 28   | 0.24 | 1.37 | 7  | 7  | 26.38 | Proteasome activator complex subunit 3                        |
| Q5F3W6 | YWHAG     | 228  | 0.56 | 1.37 | 8  | 7  | 21.86 | 14-3-3 protein gamma                                          |
| Q5ZKJ2 | YWHAH     | 228  | 0.56 | 1.37 | 8  | 7  | 21.05 | Uncharacterized protein                                       |
| Q90593 | HSPA5     | 580  | 0.49 | 1.35 | 16 | 16 | 27.15 | 78 kDa glucose-regulated protein                              |
| Q5ZL82 | IDH2      | 156  | 0.46 | 1.35 | 12 | 12 | 25.44 | Isocitrate dehydrogenase [NADP]                               |
| F1P582 | UQCRC2    | 283  | 0.30 | 1.34 | 8  | 8  | 20.35 | Uncharacterized protein                                       |
| Q5F491 | DDX3X     | 620  | 0.70 | 1.34 | 14 | 14 | 25.96 | Putative uncharacterized protein                              |
| Q5ZM75 | SARS      | 301  | 0.46 | 1.29 | 13 | 13 | 27.63 | Putative uncharacterized protein                              |
| Q6WNG8 | HNRNPH1   | 345  | 0.25 | 1.29 | 9  | 9  | 21.00 | Heterogeneous nuclear ribonucleoprotein H1-like protein       |
| Q5ZLI2 | PSMA3     | 93   | 0.12 | 1.28 | 5  | 5  | 19.61 | Proteasome subunit alpha type                                 |
| Q90602 | HNRNPAB   | 60   | 0.22 | 1.28 | 6  | 6  | 20.20 | Single stranded D box binding factor                          |
| Q90626 | HNRNPAB   | 46   | 0.10 | 1.28 | 6  | 6  | 23.51 | Ribonucleoprotein                                             |
| Q5ZLG0 | AACS      | 113  | 0.14 | 1.21 | 12 | 12 | 14.54 | Acetoacetyl-CoA synthetase                                    |
| Q8JG64 | PDIA3     | 196  | 0.57 | 1.21 | 11 | 11 | 22.18 | Protein disulfide-isomerase A3                                |

Key

emPAI: Exponentially Modified Protein Abundance Index (imported from MASCOT)

emPAI\_Calc. Calculated emPAI considering peptides with masses between 700 and 2800 Da.
