# Supplementary material for: SILAC-iPAC: A quantitative method for distinguishing genuine from non-specific components of protein complexes by parallel affinity capture
Source: PubMed Central journal article supplement (PMC4329988; doi:10.1016/j.jprot.2014.12.006), 2015-02-06
Supplement: mmc3.pdf [file mmc3.pdf]

**Supplemental Table S1B** . Proteins identified in wt DT40 affinity purifications using FLAG, TALON, Calmodulin and IgG sepharose affinity resins.

| ID     | Protein Description                    | Affinity resin |       |     |     | GO Annotation     |                 |            | Mascot score |       |     |     | Unique peptides |       |     |     |
|--------|----------------------------------------|----------------|-------|-----|-----|-------------------|-----------------|------------|--------------|-------|-----|-----|-----------------|-------|-----|-----|
|        |                                        | FLAG           | TALON | Cal | IgG | Cell component    | Bio. Process    | Mol.       | FLAG         | TALON | Cal | IgG | FLAG            | TALON | Cal | IgG |
| Q90593 | 78 kDa glucose-regulated protein       | 1              | 1     | 1   | 1   | cs,mb,er,cp,ol,gc | cx,cob,mp,reg,r | protein    | 2332         | 610   | 34  | 23  | 34              | 13    | 5   | 3   |
| P08106 | Heat shock 70 kDa protein              | 1              | 1     | 1   | 1   | cs                | cob,res         | protein    | 909          | 523   | 34  | 23  | 15              | 12    | 6   | 4   |
| P51913 | Alpha-enolase                          | 1              | 1     | 1   | 1   | cp,cl             | mp              | metal ion  | 614          | 1115  | 654 | 136 | 12              | 17    | 13  | 10  |
| Q90835 | Elongation factor 1-alpha 1            | 1              | 1     | 1   | 1   | cp                | mp              | protein    | 341          | 503   | 40  | 205 | 14              | 11    | 8   | 9   |
| Q6PVZ3 | Type II alpha-keratin IIC              | 1              | 1     | 1   | 1   | ck                |                 | structural | 298          | 373   | 361 | 378 | 13              | 8     | 11  | 10  |
| Q6PVZ5 | Type II alpha-keratin IIA              | 1              | 1     | 1   | 1   | ck                |                 | motor      | 270          | 320   | 272 | 298 | 13              | 9     | 9   | 7   |
| O93532 | Keratin, type II cytoskeletal cochlear | 1              | 1     | 1   | 1   | ck                |                 | structural | 264          | 340   | 275 | 317 | 11              | 11    | 8   | 11  |
| P00340 | L-lactate dehydrogenase A chain        | 1              | 1     | 1   | 1   | cp,cl             | mp              | nucleotide | 262          | 376   | 144 | 314 | 4               | 7     | 3   | 5   |
| Q5ZHW8 | Uncharacterized protein                | 1              | 1     | 1   | 1   | mt,cp,rb,ol,cl,nu | mp,reg          | RNA        | 212          | 200   | 48  | 82  | 5               | 3     | 1   | 3   |
| P00548 | Pyruvate kinase muscle isozyme         | 1              | 1     | 1   | 1   | cp,cl             | mp              | metal ion  | 204          | 271   | 129 | 179 | 5               | 10    | 10  | 6   |
| O93256 | Keratin, type I cytoskeletal 19        | 1              | 1     | 1   | 1   | ck                |                 | motor      | 164          | 147   | 195 | 70  | 8               | 6     | 5   | 2   |
| E1BY89 | Uncharacterized protein                | 1              | 1     | 1   | 1   | cp,rb,ol,cl,nu    | mp              | structural | 121          | 132   | 43  | 41  | 3               | 3     | 3   | 3   |
| POC1H4 | Histone H2B 5                          | 1              | 1     | 1   | 1   | ch,nu             | cob,mp          | DNA        | 120          | 144   | 320 | 720 | 3               | 6     | 6   | 8   |
| Q6PVZ4 | Type II alpha-keratin IIB              | 1              | 1     | 1   | 1   | ck                |                 | motor      | 118          | 225   | 209 | 215 | 8               | 5     | 8   | 5   |
| H9KZP2 | similar to cytokeratin 8               | 1              | 1     | 1   | 1   | ck                |                 | motor      | 114          | 171   | 160 | 163 | 6               | 4     | 5   | 4   |
| P00356 | glyceraldehyde-3-phosphate             | 1              | 1     | 1   | 1   |                   | mp              | catalytic  | 92           | 343   | 41  | 141 | 7               | 7     | 5   | 8   |
| P07322 | Beta-enolase                           | 1              | 1     | 1   | 1   | cp,cl             | mp              | metal ion  | 85           | 166   | 211 | 80  | 1               | 2     | 2   | 3   |
| Q5ZLN1 | Phosphoglycerate mutase 1              | 1              | 1     | 1   | 1   | cp,cl             | mp              | catalytic  | 71           | 43    | 61  | 56  | 3               | 2     | 2   | 2   |
| Q6PVZ2 | Type I alpha-keratin 15                | 1              | 1     | 1   | 1   | ck                |                 | structural | 60           | 51    | 51  | 40  | 8               | 6     | 12  | 5   |
| F1NDP0 | Keratin, type I cytoskeletal 14        | 1              | 1     | 1   | 1   | ck                |                 | structural | 53           | 47    | 39  | 40  | 5               | 8     | 4   | 2   |
| P62801 | Histone H4                             | 1              | 1     | 1   | 1   | ch,nu             | dev,cob,mp,reg  | DNA        | 52           | 177   | 278 | 482 | 5               | 5     | 6   | 6   |
| Q5ZMD6 | Histone H2A.Z                          | 1              | 1     | 1   | 1   | ch,nu             | cob,mp          | DNA        | 39           | 50    | 69  | 106 | 5               | 2     | 3   | 4   |
| D0EKR3 | Peptidyl-prolyl cis-trans isomerase    | 1              | 1     | 1   | 1   |                   | mp              | catalytic  | 36           | 136   | 113 | 120 | 3               | 6     | 6   | 6   |
| P60706 | Actin, cpic 1                          | 1              |       | 1   | 1   | ck,cp             |                 | nucleotide | 1214         |       | 237 | 460 | 16              | 0     | 10  | 13  |
| P09203 | Tubulin beta-1 chain                   | 1              | 1     |     | 1   | ck,cp             | cob,mp,ccm      | nucleotide | 761          | 505   |     | 40  | 16              | 11    | 0   | 3   |
| P02552 | Tubulin alpha-1C chain                 | 1              | 1     |     | 1   |                   | cob,mp          | nucleotide | 749          | 268   |     | 34  | 7               | 8     | 0   | 3   |
| P08070 | Tubulin alpha-2 chain                  | 1              | 1     | 1   |     | ck,cp             | cob,mp,ccm      | nucleotide | 657          | 150   | 32  |     | 9               | 6     | 1   | 0   |
| P68034 | Actin, alpha cardiac muscle 1          | 1              | 1     | 1   |     | ck,cp             | cx,cob,mp,ccm   | protein    | 450          | 571   | 200 |     | 10              | 13    | 8   | 0   |
| Q8UWG7 | 60S ribosomal protein L6               | 1              | 1     |     | 1   | cp,rb,cl          | mp              | structural | 418          | 136   |     | 23  | 11              | 9     | 0   | 2   |
| P09653 | Tubulin beta-5 chain                   | 1              | 1     |     | 1   | ck,cp             | cob,mp,ccm      | nucleotide | 395          | 138   |     | 40  | 12              | 7     | 0   | 3   |
| Q6EE60 | 60S ribosomal protein L18              | 1              | 1     | 1   |     | cp,rb             | mp              | structural | 350          | 328   | 36  |     | 9               | 5     | 4   | 0   |
| O57391 | Gamma-enolase                          | 1              | 1     | 1   |     | cp,cl             | mp              | metal ion  | 238          | 295   | 275 |     | 3               | 5     | 4   | 0   |
| Q5ZL72 | 60 kDa heat shock protein,             | 1              | 1     | 1   |     | ex,cs,mb,mt,cp,   | cx,cp,mp,reg,re | protein    | 209          | 281   | 26  |     | 6               | 12    | 3   | 0   |
| Q8JFP1 | Eukaryotic initiation factor 4A-II     | 1              | 1     |     | 1   |                   | mp              | RNA        | 178          | 172   |     | 74  | 5               | 5     | 0   | 4   |
| P61355 | 60S ribosomal protein L27              | 1              | 1     |     | 1   | cp,rb,cl          | mp              | structural | 141          | 41    |     | 34  | 5               | 3     | 0   | 1   |
| Q98TF8 | 60S ribosomal protein L22              | 1              | 1     | 1   |     | cp,rb             | mp              | structural | 139          | 193   | 56  |     | 3               | 3     | 2   | 0   |
| Q5ZLC5 | ATP synthase subunit beta,             | 1              | 1     |     | 1   | mb,mt,cp          | dev,tp,mp,reg,  | tper       | 129          | 277   |     | 62  | 7               | 9     | 0   | 3   |

|         |                                       |   |   |   |                 |                 |            |            |     |    |     |    |    |   |    |   |
|---------|---------------------------------------|---|---|---|-----------------|-----------------|------------|------------|-----|----|-----|----|----|---|----|---|
| P63247  | Guanine nucleotide-binding protein    | 1 | 1 | 1 | mb,cp,nu        | cx,dev,cob,tp,  | protein    | 120        | 43  |    | 29  | 4  | 6  | 0 | 4  |   |
| Q03853  | Gag protein                           | 1 | 1 | 1 |                 | mp              | metal ion  | 63         | 305 | 90 |     | 12 | 9  | 6 | 0  |   |
| Q5ZKC9  | 14-3-3 protein zeta                   | 1 | 1 | 1 | mt,cp,nu        | tp              | protein    | 48         | 107 | 35 |     | 3  | 5  | 2 | 0  |   |
| P14732  | Lamin-B2                              | 1 | 1 | 1 | ck,mb,nu        | mp,reg          | motor      | 46         | 32  |    | 37  | 5  | 9  | 0 | 5  |   |
| Q6ITC7  | 40S ribosomal protein S13             | 1 | 1 | 1 | cp,rb,ol,nu,cl  | mp,reg          | RNA        | 43         | 75  | 23 |     | 3  | 2  | 1 | 0  |   |
| P09654  | Vimentin                              | 1 | 1 | 1 | ck,mb,cp        | cob,mp,reg      | protein    | 39         | 47  | 48 |     | 6  | 9  | 5 | 0  |   |
| E1BU66  | Uncharacterized protein               | 1 | 1 | 1 | cp,rb,cl        | mp              | structural | 37         | 62  |    | 39  | 3  | 4  | 0 | 1  |   |
| F6R1X6  | Sjogren syndrome antigen B            | 1 | 1 | 1 |                 |                 |            | 36         | 105 |    | 47  | 6  | 8  | 0 | 4  |   |
| Q5F411  | Uncharacterized protein               | 1 | 1 | 1 | ck,cp,ol,nu,cl  | mp              | protein    | 34         | 92  |    | 42  | 1  | 9  | 0 | 3  |   |
| P51903  | Phosphoglycerate kinase               | 1 | 1 | 1 | cp,ch,cl        | mp              | nucleotide | 31         | 74  |    | 28  | 3  | 8  | 0 | 5  |   |
| F1NF88  | phosphatase and actin regulator 3     | 1 | 1 | 1 |                 |                 |            | 26         | 32  |    | 29  | 3  | 5  | 0 | 3  |   |
| P11533  | Dystrophin                            | 1 | 1 | 1 | ck,mb,cp        |                 | protein    | 24         | 24  |    | 24  | 14 | 10 | 0 | 12 |   |
| Q5ZLX5  | similar to RAN-binding protein 2-like | 1 | 1 | 1 |                 | tp              |            | 23         | 41  | 25 |     | 2  | 4  | 2 | 0  |   |
| F1N9H4  | elongation factor 1 alpha 2           |   | 1 | 1 | 1               |                 | nucleotide |            | 419 | 40 | 158 | 0  | 7  | 6 | 7  |   |
| Q03852  | Gag protein                           |   | 1 | 1 | 1               | mp              | metal ion  |            | 302 | 90 | 35  | 0  | 8  | 6 | 2  |   |
| Q6PVZ1  | Keratin 14                            |   | 1 | 1 | 1               |                 |            |            | 63  | 98 | 70  | 0  | 2  | 4 | 2  |   |
| O42283  | Heat shock protein 10                 |   | 1 | 1 | 1               | mt,cp           | mp,res     | nucleotide |     | 48 | 135 | 44 | 0  | 2 | 2  | 3 |
| P08287  | Histone H1.11L                        |   | 1 | 1 | 1               | ch,nu           | cob,mp     | DNA        |     | 47 | 54  | 60 | 0  | 3 | 2  | 3 |
| Q5ZMJ7  | protein CIP2A homolog                 |   | 1 | 1 | 1               | ck,mb,cp,ol,ch, | cob,tp,rep | protein    |     | 35 | 28  | 39 | 0  | 2 | 3  | 3 |
| 2.3E+08 | heat shock 105kDa                     | 1 | 1 |   |                 |                 |            | 4329       | 867 |    |     | 51 | 15 | 0 | 0  |   |
| Q5ZK62  | Arf-GAP with coiled-coil, ANK repeat  | 1 | 1 |   |                 | mp,reg          | protein    | 2750       | 186 |    |     | 39 | 6  | 0 | 0  |   |
| Q5ZMU9  | Valosin containing protein            | 1 | 1 |   |                 | mp,res,rep      | protein    | 1760       | 309 |    |     | 36 | 9  | 0 | 0  |   |
| O73885  | Heat shock cognate 71 kDa protein     | 1 | 1 |   | cs,cp           | cob,tp,res      | nucleotide | 1739       | 610 |    |     | 24 | 18 | 0 | 0  |   |
| Q5ZL26  | Phosphoribosyl pyrophosphate          | 1 | 1 |   |                 | mp              | metal ion  | 1557       | 230 |    |     | 21 | 1  | 0 | 0  |   |
| Q5F4A4  | Inosine-5'-monophosphate              | 1 | 1 |   |                 | mp              | protein    | 1501       | 249 |    |     | 23 | 12 | 0 | 0  |   |
| P09244  | Tubulin beta-7 chain                  | 1 | 1 |   | ck,cp           | cob,mp,ccm      | nucleotide | 1251       | 619 |    |     | 18 | 12 | 0 | 0  |   |
| P15771  | Nucleolin                             | 1 | 1 |   | ol,nu           |                 | DNA        | 1059       | 541 |    |     | 21 | 18 | 0 | 0  |   |
| Q7S163  | Heat shock protein 70                 | 1 |   | 1 | cs,mb,mt,cp,ol, | cob,mp,reg,res, | protein    | 909        |     | 34 |     | 14 | 0  | 6 | 0  |   |
| E1BYN9  | phosphoribosyl pyrophosphate          | 1 | 1 |   |                 | mp              | metal ion  | 720        | 184 |    |     | 10 | 4  | 0 | 0  |   |
| D6PVB7  | Heat shock protein 70                 | 1 | 1 |   |                 | cob,res         | nucleotide | 707        | 116 |    |     | 14 | 9  | 0 | 0  |   |
| Q9IAY5  | protein syndesmos                     | 1 | 1 |   |                 |                 |            | 699        | 56  |    |     | 11 | 5  | 0 | 0  |   |
| P09652  | Tubulin beta-4 chain                  | 1 | 1 |   | ck,cp           | cob,mp,ccm      | nucleotide | 679        | 313 |    |     | 13 | 10 | 0 | 0  |   |
| Q5ZII4  | Putative uncharacterized protein      | 1 | 1 |   |                 | mp              | metal ion  | 618        | 68  |    |     | 9  | 2  | 0 | 0  |   |
| P47826  | 60S acidic ribosomal protein P0       | 1 | 1 |   | cp,rb           | mp              | structural | 611        | 434 |    |     | 9  | 10 | 0 | 0  |   |
| F2Z4K7  | Uncharacterized protein               | 1 | 1 |   | cp,rb,ol,cl,nu  | cx,mp,reg       | structural | 408        | 426 |    |     | 11 | 14 | 0 | 0  |   |
| Q5F491  | Putative uncharacterized protein      | 1 | 1 |   |                 |                 | nucleotide | 383        | 201 |    |     | 10 | 6  | 0 | 0  |   |
| E1C4M0  | 40S ribosomal protein S2              | 1 | 1 |   | cp,rb           | mp              | RNA        | 380        | 199 |    |     | 9  | 9  | 0 | 0  |   |
| P41125  | 60S ribosomal protein L13             | 1 | 1 |   | cp,rb,cl        | mp              | structural | 369        | 330 |    |     | 5  | 6  | 0 | 0  |   |
| Q5ZII1  | Uncharacterized protein               | 1 | 1 |   | cp,rb,ol,nu,cl  | mp              | structural | 364        | 79  |    |     | 15 | 9  | 0 | 0  |   |
| Q5ZJC1  | Putative uncharacterized protein      | 1 | 1 |   | cp,rb           | mp              | RNA        | 363        | 334 |    |     | 9  | 7  | 0 | 0  |   |

|        |                                     |   |   |  |                |                 |            |     |     |  |  |    |    |   |   |
|--------|-------------------------------------|---|---|--|----------------|-----------------|------------|-----|-----|--|--|----|----|---|---|
| P09207 | Tubulin beta-6 chain                | 1 | 1 |  | ck,cp          | cob,mp,ccm      | nucleotide | 358 | 149 |  |  | 9  | 8  | 0 | 0 |
| Q6EE57 | 40S ribosomal protein S8            | 1 | 1 |  | cp,rb          | mp              | structural | 328 | 133 |  |  | 7  | 5  | 0 | 0 |
| Q5Z149 | Ribose-phosphate                    | 1 | 1 |  |                | mp              | protein    | 308 | 39  |  |  | 8  | 3  | 0 | 0 |
| Q5ZIG4 | Putative uncharacterized protein    | 1 | 1 |  |                | mp              | nucleotide | 297 | 65  |  |  | 6  | 1  | 0 | 0 |
| Q5ZLG7 | Putative uncharacterized protein    | 1 | 1 |  | mb,mt,cp       | tp              | tper       | 285 | 187 |  |  | 14 | 8  | 0 | 0 |
| Q5ZME1 | Uncharacterized protein             | 1 | 1 |  | sc,ol,nu       | mp,tp,reg       | DNA        | 234 | 206 |  |  | 5  | 3  | 0 | 0 |
| Q5ZJZ2 | Putative uncharacterized protein    | 1 | 1 |  | cp,rb          | mp              | structural | 232 | 31  |  |  | 11 | 7  | 0 | 0 |
| Q5ZMJ6 | Uncharacterized protein             | 1 | 1 |  | mt,mb,cp       | cx,cob,tp,reg   | tper       | 227 | 188 |  |  | 10 | 5  | 0 | 0 |
| Q5ZLE6 | Eukaryotic translation initiation   | 1 | 1 |  | cp             | mp              | protein    | 213 | 93  |  |  | 8  | 4  | 0 | 0 |
| P32429 | 60S ribosomal protein L7a           | 1 | 1 |  | cp,rb          |                 |            | 201 | 96  |  |  | 14 | 6  | 0 | 0 |
| Q08200 | 60S ribosomal protein L10           | 1 | 1 |  | cp,rb,nu       | mp              | structural | 200 | 86  |  |  | 8  | 2  | 0 | 0 |
| Q9W744 | DEAD-bo1 RNA helicase               | 1 | 1 |  | nu             |                 | nucleotide | 195 | 61  |  |  | 14 | 11 | 0 | 0 |
| F1NI22 | ATP synthase alpha subunit, partial | 1 | 1 |  | mb             | mp,tp           | tper       | 181 | 238 |  |  | 10 | 7  | 0 | 0 |
| Q9PTD6 | 40S ribosomal protein S6            | 1 | 1 |  | cp,rb,ol,nu    | cx,mp,reg,res,c | protein    | 179 | 299 |  |  | 9  | 9  | 0 | 0 |
| P47836 | 40S ribosomal protein S4            | 1 | 1 |  | cp,rb          | mp              | RNA        | 170 | 254 |  |  | 7  | 7  | 0 | 0 |
| P67883 | 60S ribosomal protein L30           | 1 | 1 |  | cp,rb,cl       | mp              | structural | 163 | 117 |  |  | 7  | 4  | 0 | 0 |
| E1BS06 | Uncharacterized protein             | 1 | 1 |  | cp,rb,nu,cl    | cp,mp           | nucleotide | 160 | 117 |  |  | 7  | 4  | 0 | 0 |
| Q5Z156 | Putative uncharacterized protein    | 1 | 1 |  | cp,rb          | mp              | structural | 154 | 148 |  |  | 2  | 3  | 0 | 0 |
| Q5ZKK8 | Ribosomal protein L19               | 1 | 1 |  | cp,rb,cl       | mp              | structural | 154 | 33  |  |  | 4  | 5  | 0 | 0 |
| E1C8R1 | Probable ATP-dependent RNA          | 1 | 1 |  |                |                 | nucleotide | 152 | 55  |  |  | 4  | 2  | 0 | 0 |
| Q5ZJN2 | Ras-related protein Rab-11A         | 1 | 1 |  | ck,mb,mt,cp,gg | cob,tp,mp,reg,r | protein    | 143 | 61  |  |  | 8  | 3  | 0 | 0 |
| H9L213 | Uncharacterized protein             | 1 | 1 |  | cp,rb          | mp              | structural | 130 | 114 |  |  | 3  | 5  | 0 | 0 |
| Q5ZM98 | Stress-70 protein, mitochondrial    | 1 | 1 |  | mt,cp          | cob,mp          | protein    | 126 | 48  |  |  | 7  | 8  | 0 | 0 |
| Q5ZJ56 | 60S ribosomal protein L7            | 1 | 1 |  | cp,rb,cl       | mp              | protein    | 123 | 99  |  |  | 11 | 8  | 0 | 0 |
| F1NTT2 | ribosomal protein S28               | 1 | 1 |  | cp,rb          | mp              | structural | 110 | 168 |  |  | 4  | 2  | 0 | 0 |
| P51417 | 60S ribosomal protein L15           | 1 | 1 |  | cp,rb          | mp              | structural | 98  | 50  |  |  | 6  | 3  | 0 | 0 |
| Q90705 | Elongation factor 2                 | 1 | 1 |  | cp             | mp              | RNA        | 91  | 148 |  |  | 6  | 14 | 0 | 0 |
| Q9YGQ1 | elongation factor 1                 | 1 | 1 |  |                |                 |            | 87  | 163 |  |  | 1  | 1  | 0 | 0 |
| P11501 | Heat shock protein HSP 90-alpha     | 1 | 1 |  | cp             | mp,reg,res      | protein    | 82  | 503 |  |  | 10 | 17 | 0 | 0 |
| Q5ZKA5 | Bifunctional                        | 1 | 1 |  | mt,cp          | mp              | nucleotide | 76  | 163 |  |  | 5  | 2  | 0 | 0 |
| P62846 | 40S ribosomal protein S15a          | 1 | 1 |  | cp,rb          | mp              | structural | 75  | 92  |  |  | 4  | 4  | 0 | 0 |
| Q98TF7 | 60S ribosomal protein L35           | 1 | 1 |  | cp,rb          | mp              | structural | 73  | 64  |  |  | 2  | 2  | 0 | 0 |
| Q9PT84 | voltage-gated potassium channel     | 1 | 1 |  |                |                 |            | 72  | 75  |  |  | 6  | 1  | 0 | 0 |
| Q5ZL53 | Putative uncharacterized protein    | 1 | 1 |  |                |                 | RNA        | 66  | 70  |  |  | 9  | 13 | 0 | 0 |
| E1C6T8 | Uncharacterized protein             | 1 | 1 |  |                | mp              | protein    | 63  | 26  |  |  | 6  | 2  | 0 | 0 |
| P04210 | immunoglobulin light-chain VJ       | 1 | 1 |  |                |                 |            | 60  | 59  |  |  | 1  | 1  | 0 | 0 |
| Q04619 | Heat shock cognate protein HSP 90-  | 1 | 1 |  | cp,cl          | mp,res          | protein    | 56  | 116 |  |  | 4  | 5  | 0 | 0 |
| P47832 | ribosomal protein L26               | 1 | 1 |  |                |                 |            | 50  | 136 |  |  | 7  | 8  | 0 | 0 |
| P79781 | Ubiquitin-40S ribosomal protein     | 1 | 1 |  | cp,rb,ol,nu    | mp,reg,res,cc,d | protein    | 48  | 110 |  |  | 5  | 5  | 0 | 0 |
| Q98TF6 | 60S ribosomal protein L36           | 1 | 1 |  | cp,rb          | mp              | structural | 48  | 58  |  |  | 3  | 5  | 0 | 0 |

|        |                                        |   |   |   |               |                 |            |    |     |     |     |    |    |   |   |   |
|--------|----------------------------------------|---|---|---|---------------|-----------------|------------|----|-----|-----|-----|----|----|---|---|---|
| Q5ZKJ2 | Uncharacterized protein                | 1 | 1 |   | cp            | tp,mp,reg,res,c | protein    | 46 | 46  |     |     | 2  | 2  | 0 | 0 |   |
| Q5ZMD1 | 14-3-3 protein theta                   | 1 | 1 |   | ck,cp,nu      | mp,tp,reg,res,c | protein    | 46 | 30  |     |     | 3  | 4  | 0 | 0 |   |
| Q5ZMT0 | 14-3-3 protein epsilon                 | 1 | 1 |   | cp            |                 | protein    | 46 | 25  |     |     | 4  | 2  | 0 | 0 |   |
| O57535 | Nucleoside diphosphate kinase          | 1 | 1 |   | mb,mt,cp      | cx,cp,dev,mp,r  | metal ion  | 44 | 58  |     |     | 4  | 4  | 0 | 0 |   |
| H9L3K5 | similar to strabismus                  | 1 | 1 |   | mb            | dev             |            | 42 | 30  |     |     | 2  | 2  | 0 | 0 |   |
| P02263 | Histone H2A-IV                         | 1 |   | 1 | ch,nu         | cob,mp          | DNA        | 39 |     | 236 |     | 3  | 0  | 5 | 0 |   |
| E1BWI7 | Uncharacterized protein                | 1 | 1 |   |               |                 | RNA        | 37 | 31  |     |     | 8  | 5  | 0 | 0 |   |
| P18460 | inositol 1,4,5-trisphosphate           | 1 | 1 |   | mb            | tp              | tper       | 33 | 33  |     |     | 11 | 6  | 0 | 0 |   |
| F1NZV1 | Uncharacterized protein                | 1 | 1 |   | mb,er,cp      | tp,reg,res,cc   | signal     | 33 | 33  |     |     | 16 | 11 | 0 | 0 |   |
| Q5ZIH1 | Uncharacterized protein                | 1 | 1 |   |               | mp,reg          | nucleotide | 32 | 30  |     |     | 5  | 2  | 0 | 0 |   |
| E1C903 | Uncharacterized protein                | 1 | 1 |   |               |                 | RNA        | 31 | 31  |     |     | 4  | 6  | 0 | 0 |   |
| Q98TH5 | Ribosomal protein S11                  | 1 | 1 |   | cp,rb         | mp              | structural | 31 | 27  |     |     | 4  | 4  | 0 | 0 |   |
| P30352 | Serine/arginine-rich splicing factor 2 | 1 | 1 |   | nu            | mp              | RNA        | 30 | 43  |     |     | 1  | 3  | 0 | 0 |   |
| Q5ZIB2 | Fas-binding factor 1 homolog           | 1 |   | 1 | ck,mb,cp      | cob,tp,mp,reg   | tper       | 29 |     | 48  |     | 4  | 0  | 4 | 0 |   |
| Q5ZL60 | Uncharacterized protein                | 1 | 1 |   | ck            | cob             | protein    | 28 | 48  |     |     | 3  | 9  | 0 | 0 |   |
| F1P2S8 | A-kinase anchor protein 9              | 1 | 1 |   | ck,mb         | mp,tp,reg       | tper       | 27 | 44  |     |     | 17 | 13 | 0 | 0 |   |
| P00508 | Aspartate aminotransferase,            | 1 | 1 |   | mt,cp,ol      | mp              | protein    | 27 | 32  |     |     | 4  | 7  | 0 | 0 |   |
| Q8JG64 | Protein disulfide-isomerase A3         | 1 | 1 |   | er,cp,ol      | cx,mp,reg,ch    | catalytic  | 26 | 317 |     |     | 2  | 16 | 0 | 0 |   |
| P81021 | Vigilin                                | 1 | 1 |   | cp            |                 | RNA        | 26 | 31  |     |     | 9  | 6  | 0 | 0 |   |
| Q5ZJ86 | Putative uncharacterized protein       | 1 |   | 1 | cp            | mp              | nucleotide | 26 |     | 28  |     | 12 | 0  | 5 | 0 |   |
| Q5ZL27 | Putative uncharacterized protein       | 1 | 1 |   | cp            | cob             |            | 25 | 160 |     |     | 3  | 1  | 0 | 0 |   |
| Q5ZKU2 | Putative uncharacterized protein       | 1 |   |   | 1 ch          | mp,res          | DNA        | 25 |     |     | 25  | 9  | 0  | 0 | 4 |   |
| P00337 | L-lactate dehydrogenase B chain        | 1 | 1 |   | mt,cp,cl      | mp              | nucleotide | 24 | 105 |     |     | 3  | 7  | 0 | 0 |   |
| Q90679 | Thymocyte nuclear protein 1            | 1 | 1 |   | nu            |                 |            | 24 | 42  |     |     | 5  | 4  | 0 | 0 |   |
| Q01841 | gamma-glutamyltransferase-like 3       | 1 | 1 |   |               |                 | catalytic  | 24 | 33  |     |     | 1  | 2  | 0 | 0 |   |
| P53449 | Fructose-bisphosphate aldolase C       |   | 1 | 1 | cp,cl         | mp              | catalytic  |    | 137 | 42  |     | 0  | 3  | 1 | 0 |   |
| P18359 | Dextrin                                |   | 1 |   | 1             |                 | protein    |    | 105 |     | 27  | 0  | 6  | 0 | 1 |   |
| Q5ZLQ6 | 14-3-3 protein beta/alpha              |   | 1 | 1 | ck,cp,nu      | mp,tp,reg       | protein    |    | 91  | 35  |     | 0  | 5  | 2 | 0 |   |
| P08285 | Histone H1.03                          |   | 1 |   | 1 ch,nu       | cob,mp          | DNA        |    | 47  |     | 60  | 0  | 3  | 0 | 3 |   |
| Q5ZK51 | gg SNAP receptor complex member        |   | 1 | 1 | mb,cp,gg      | tp              |            |    | 39  | 30  |     | 0  | 3  | 1 | 0 |   |
| Q5F454 | Uncharacterized protein                |   | 1 | 1 |               | mp              | nucleotide |    | 34  | 30  |     | 0  | 5  | 4 | 0 |   |
| P16039 | Nucleophosmin                          |   | 1 |   | 1 ck,cp,ol,nu | cp,cob,mp,reg,  | protein    |    | 27  |     | 42  | 0  | 2  | 0 | 3 |   |
| P84229 | histone H3                             |   | 1 |   | 1             |                 | DNA        |    | 24  |     | 441 | 0  | 6  | 0 | 9 |   |
| Q6EE58 | Ribosomal protein S3                   |   |   | 1 | 1 cp,rb       | mp              | RNA        |    |     |     | 23  | 77 | 0  | 0 | 1 | 5 |

Key. Cell components: ch chromosomal; ck cytoskeletal; cl cytosol; cp cytoplasm; cs cell surface; em endosome; er endoplasmic reticulum;

gg golgi; nu nucleus; mb membrane; mt mitochondrial; ol organelle lumen; rb ribosome; sc splicosomal complex

Biological function Key: cc cell communication; ccm cellular component movement; cd cell division; cdf cell differentiation;

ch cellular homeostasis; cob cell organisation and biosynthesis; cp cell proliferation; cx cell death; dfr defense response; mp metabolic process;

rbp regulation of biological process; rep reproduction; res response to stimulus; tp transport

Grey indicates proteins with >1 identification with low Mascot (<50) and/or low peptide scoring
