# Supplementary material for: SILAC-iPAC: A quantitative method for distinguishing genuine from non-specific components of protein complexes by parallel affinity capture
Source: PubMed Central journal article supplement (PMC4329988; doi:10.1016/j.jprot.2014.12.006), 2015-02-06
Supplement: mmc4.pdf [file mmc4.pdf]

**Supplemental Table S2A** . PI5P4K2 bait peptides observed in parallel purifications in replicate and reciprocal labelling experiments

| Peptide                       | FLAG       | TALON | reciprocals |
|-------------------------------|------------|-------|-------------|
| <b>AAPGTVASVMASK</b>          | 1,2,3,4    | 3     | ✓           |
| AAPGTVASVMASKTK               |            | 2     |             |
| AAPGTVASVMASKTKTK             | 2          |       |             |
| <b>ASDPLLSVLMWGVNHSINELSH</b> |            |       |             |
| <b>VQIPVMLMPDDFK</b>          | 4          |       |             |
| <b>DNDFINDGQK</b>             | 3, 4       | 2, 3  |             |
| ELPTFKDNDFINDGQK              | 3          |       |             |
| ENMPSHFKFK                    | 1          |       |             |
| <b>EVYFMAIIDILTHYDAK</b>      | 3          |       |             |
| <b>FGIDDQDFQNSLTR</b>         | 2, 3, 4    | 2, 3  | ✓           |
| <b>FLDFIANILT</b>             | 2, 3, 4    | 2, 3  | ✓           |
| <b>IHIDENNR</b>               | 3          |       |             |
| <b>KEYYFMAIIDILTHYDAK</b>     | 3, 4       | 3     |             |
| KEYYFMAIIDILTHYDAKK           | 1, 2, 3    | 2     |             |
| KYDLKGSTVAR                   | 3, 4       | 3     |             |
| <b>LMDYSLLVGIHDVER</b>        | 4          | 3     | ✓           |
| <b>LTVDGVEIYMIVTR</b>         | 3          |       |             |
| RMFLEKLK                      | 2          |       |             |
| SAPLANDSQARSGAR               |            | 4     |             |
| <b>TITSEDVAEMHNILK</b>        | 3, 4       | 1, 3  | ✓           |
| YDLKGSTVAREASDK               | 1          | 3     |             |
| <b>AEQEEMEVEDR</b>            | 2, 3, 4    |       | ✓           |
| <b>AVSSEDVAEMHNILK</b>        | 4          |       |             |
| <b>DNDFLNEGQK</b>             | 3, 4       | 2     | ✓           |
| EVYFMAIIDILTPYDAKK            | 4          |       | ✓           |
| EYCPLVFR                      | 4          |       |             |
| <b>FFGPGEFDPSPVDVYAMK</b>     | 4          |       | ✓           |
| <b>FGIDDQDYQNSVTR</b>         | 2, 3, 4    |       | ✓           |
| FKEYCPLVFR                    | 4          |       |             |
| FLTTYDR                       | 2, 3, 4    |       | ✓           |
| FLTTYDRR                      | 3          |       | ✓           |
| GSTVSREASDK                   |            | 3     |             |
| <b>IMDYSLLVGIHDVDR</b>        | 4          |       | ✓           |
| <b>LTVDGVETYMVVTR</b>         | 2, 4       |       | ✓           |
| NVFSHRLTVHR                   | 4          |       |             |
| <b>SAPVNSDSQGR</b>            | 4          |       | ✓           |
| YDLKGSTVSREASDK               | 3          |       |             |
| <i>DVEFLAQLK</i>              | 1, 2, 3, 4 | 3, 4  | ✓           |
| <i>EASDKEK</i>                |            | 3     |             |
| <i>EASDKEKAK</i>              | 4          |       |             |
| <i>HGAGAEISTVNPEQYSK</i>      | 2, 3, 4    | 3, 4  | ✓           |
| <i>IKVDNHLFNK</i>             | 2, 3, 4    | 4     | ✓           |
| <i>NVFSHR</i>                 | 3          |       | ✓           |
| <i>VDNHLFNK</i>               | 2          | 1     | ✓           |

Key:  $\alpha$  peptides (amber),  $\beta$  peptides (blue), peptides found in both (grey).  
 numbers indicate the experiment number in which the peptide was identified.  
**Bold** indicated peptides used for **quantitation**
