# Supplementary material for: SILAC-iPAC: A quantitative method for distinguishing genuine from non-specific components of protein complexes by parallel affinity capture
Source: PubMed Central journal article supplement (PMC4329988; doi:10.1016/j.jprot.2014.12.006), 2015-02-06
Supplement: mmc5.pdf [file mmc5.pdf]

Supplemental Table S2B. FANC peptides from Fanc core complex

| Fanc Group     | Protein Accession(s) (UniprotKB) | Peptide Sequence                   | CaM         | IgG         |
|----------------|----------------------------------|------------------------------------|-------------|-------------|
| A              | B3Y9I3                           | AELDALAR                           | 1,2, 2r     | 1r,2,2r     |
| A              | B3Y9I3                           | AGAGGGTLR                          | 1           |             |
| A              | B3Y9I3, F1NLX0                   | CCCAVHPDSLQQFFR                    |             | 1r          |
| A              | F1NLX0                           | EKMLQDKR                           |             | 2           |
| A              | B3Y9I3                           | ELLQGRAR                           | 2           |             |
| A              | B3Y9I3, F1NLX0                   | KSTFGSTAELR                        | 2r          |             |
| A              | B3Y9I3, F1NLX0                   | LDLGSCGQLKSVSPDIHCK                | 1           |             |
| A              | B3Y9I3, F1NLX0                   | LGVPTAVLAAK                        |             | 1           |
| A              | B3Y9I3                           | LREYQSSAMGFLSSGR                   | 2r          |             |
| A              | B3Y9I3, F1NLX0                   | QARFQELLKEK                        | 1           |             |
| <b>A</b>       | <b>B3Y9I3, F1NLX1</b>            | <b>total sequence coverage (%)</b> | <b>5.7</b>  | <b>2.8</b>  |
| B              | B9A0U5                           | EQCMLSMHETMDGTLYQEVALK             |             | 1r          |
| B              | B9A0U5, E1BTB6                   | FMPHAYSR                           | 1r          |             |
| B              | B9A0U5, E1BTB6                   | KMKLCLR                            |             | 2           |
| B              | B9A0U5, E1BTB6                   | LMKSGSK                            |             | 1           |
| B              | B9A0U5                           | LQNEKEQCMLSMHETMDGTLYQEVALK        | 1           | 1,2,2r      |
| B              | B9A0U5, E1BTB6                   | MKKHNGVVEHLLLLHSSDR                | 2r          |             |
| B              | E1BTB6                           | MKPDQSSMEDIAAILAVSIRSSFQILSSDCTLTR | 2r          |             |
| B              | B9A0U5, E1BTB6                   | MLTGARFMPHAYSR                     |             | 2           |
| B              | B9A0U5, E1BTB6                   | RVILQSCRALIDLVEGR                  |             | 1r          |
| B              | B9A0U5, E1BTB6                   | SFLSSKESK                          |             | 2r          |
| B              | E1BTB6                           | SPFEGVLTLCFR                       |             | 1           |
| B              | B9A0U5, E1BTB6                   | SSFQIMSSDCTLTR                     | 1           |             |
| B              | B9A0U5, E1BTB6                   | SSGAFSVR                           | 1           |             |
| B              | B9A0U5, E1BTB6                   | VAEACLSSDMIVWR                     | 1r          |             |
| B              | B9A0U5, E1BTB6                   | VVSSVCVCKSERLQK                    |             | 2           |
| <b>B</b>       | <b>B9A0U5, E1BTB7</b>            | <b>total sequence coverage (%)</b> | <b>14.5</b> | <b>15.0</b> |
| C              | Q5F3H0, Q60GM0, F1NYH1           | HNGGENQRTVK                        | 2, 2r       | 2,2r        |
| C              | Q5F3H0, Q60GM0, F1NYH1           | IVNEIFK                            |             | 2r          |
| C              | Q5F3H0, Q60GM0, F1NYH1           | MAQDITVPK                          |             | 2r          |
| C              | Q5F3H0, Q60GM0, F1NYH1           | TQTMVESQAVYSRLMMLYNR               |             | 2r          |
| <b>C</b>       | <b>Q5F3H0, Q60GM0, F1NYH1</b>    | <b>total sequence coverage (%)</b> | <b>1.9</b>  | <b>8.4</b>  |
| E              | F1NHZ9                           | CLCQKIAQSK                         |             | 2           |
| E              | F1NHZ9                           | IAQSKAEGRR                         | 2r          |             |
| E              | F1NHZ9                           | VLEESLEFSEEREGK                    | 2           |             |
| <b>E</b>       | <b>F1NHZ9</b>                    | <b>total sequence coverage (%)</b> | <b>3.0</b>  | <b>2.0</b>  |
| F              | E1C4T8                           | AFAVVAEALLR                        | 2r          |             |
| F              | E1C4T8                           | FRSRPQLRDALR                       |             | 2           |
| F              | E1C4T8                           | LAPLARRK                           |             | 1r          |
| <b>F</b>       | <b>E1C4T8</b>                    | <b>total sequence coverage (%)</b> | <b>2.8</b>  | <b>5.1</b>  |
| G              | Q7SZH6, Q5ZHU1, F1P3G7           | EAIMQFSR                           |             | 2           |
| G              | Q7SZH6, Q5ZHU1, F1P3G7           | LRCGTAPEPGCLQAWAAECEALAGR          |             | 1           |
| <b>G</b>       | <b>Q7SZH6, Q5ZHU1, F1P3G7</b>    | <b>total sequence coverage (%)</b> | <b>0</b>    | <b>5.1</b>  |
| L              | Q3MUH5                           | DLEIDFPSR                          |             | 1r          |
| <b>L</b>       | <b>Q3MUH5</b>                    | <b>total sequence coverage (%)</b> | <b>0</b>    | <b>2.7</b>  |
| M              | F1NE03                           | ADVQLTANRK                         | 1           |             |
| M              | F1NE03                           | DVPSLTK                            | 1           |             |
| M              | F1NE03                           | EFIYSHPKLK                         | 2           |             |
| M              | F1NE03                           | ELALLEQRK                          | 2r          | 2r          |
| M              | F1NE03                           | GNDASSFMER                         | 1           |             |
| M              | F1NE03                           | IIVLSDSSGEETNVSNEK                 |             | 1r          |
| M              | F1NE03                           | KTDQTTSGGTCVDTR                    |             | 1r,2r       |
| M              | F1NE03                           | LVQRMGRTGR                         |             | 2r          |
| M              | F1NE03                           | RDVPSLTK                           | 1r          | 1           |
| M              | F1NE03                           | RGNDASSFMERTCKPALHLQPNR            |             | 2r          |
| M              | F1NE03                           | RNKGHLSTSSAFAQK                    | 1           |             |
| M              | F1NE03                           | SPIRLVQRMGR                        |             | 2r          |
| M              | F1NE03                           | VNPNSQR                            | 1           |             |
| M              | F1NE03                           | VQVCSLGS GDYVVS NRMAVERK           | 1r          |             |
| M              | F1NE03                           | YKPNDSGRLPK                        |             | 1           |
| <b>M</b>       | <b>F1NE03</b>                    | <b>total sequence coverage (%)</b> | <b>6.2</b>  | <b>3.8</b>  |
| FAAP100        | A5A748, R4GG85                   | LMTCGLCPEDADVELTPAEAGRRK           |             | 1r          |
| FAAP100        | A5A748, R4GG85                   | MVAVKADQRDETTPVELR                 |             | 2r          |
| <b>FAAP100</b> | <b>A5A748, R4GG85</b>            | <b>total sequence coverage (%)</b> | <b>0</b>    | <b>4.9</b>  |

Key: 1,2 replicates 1 and 2; r= reciprocal labelled experiment.

CBP=calmodulin binding protein tag Calmodulin pulldown, IgG=IgG pulldown of Protein A tag
