# Supplementary material for: SILAC-iPAC: A quantitative method for distinguishing genuine from non-specific components of protein complexes by parallel affinity capture
Source: PubMed Central journal article supplement (PMC4329988; doi:10.1016/j.jprot.2014.12.006), 2015-02-06
Supplement: mmc6.pdf [file mmc6.pdf]

**Supplemental Table S2C . Fanconi interacting proteins**

| Genes               | Uniprot IDs            | Description                                           | Calmodulin Pulldown |       |         |         | IgG Pulldown |       |         |         |
|---------------------|------------------------|-------------------------------------------------------|---------------------|-------|---------|---------|--------------|-------|---------|---------|
|                     |                        |                                                       | rep 1               | rep 2 | r'cal 1 | r'cal 2 | rep 1        | rep 2 | r'cal 1 | r'cal 2 |
| FANCD2              | Q68Y81, FINP22         | Fanconi anemia protein FANCD2                         | 1                   | 1     | 0       | 3       | 3            | 1     | 1       | 2       |
| FANCI               | B0I564, F1P1Z1         | Fanconi anemia complementation group I                | 1                   | 2     | 0       | 1       | 3            | 1     | 2       | 2       |
| FANCI/BRIP1         | Q3YK19                 | Fanconi anemia group J protein homolog, helicase      | 1                   | 3     | 0       | 0       | 3            | 0     | 3       | 0       |
| BRCA1               | F1N8I5, Q90Z51         | Breast and ovarian cancer susceptibility-like protein | 1                   | 2     | 1       | 2       | 7            | 4     | 4       | 5       |
| FAM175 (ABRAXAS)    | Q5ZHS0, E1C3L2         | BRCA1-A complex subunit Abraxas                       | 0                   | 1     | 0       | 1       | 3            | 1     | 0       | 0       |
| BRE                 | Q5ZML0                 | BRCA1-A complex subunit BRE                           | 0                   | 1     | 0       | 0       | 0            | 2     | 0       | 0       |
| FANCD1/BRCA2        | Q8QFV6, F1P3B2         | Breast cancer type 2 susceptibility protein           | 3                   | 6     | 3       | 4       | 4            | 9     | 11      | 6       |
| PALB2/FANCN         | F1NAU2                 | Partner and localizer of BRCA2                        | 0                   | 1     | 0       | 0       | 1            | 0     | 1       | 0       |
| RAD51               | P37383                 | DNA repair protein RAD51 homolog 1                    | 1                   | 0     | 0       | 2       | 1            | 2     | 3       | 1       |
| FAN1                | F1NC90                 | Fanconi-associated nuclease 1                         | 0                   | 0     | 2       | 1       | 0            | 2     | 3       | 1       |
| SLX4/FANCP          | F1NKN4                 | Structure-specific endonuclease subunit SLX4          | 1                   | 0     | 0       | 1       | 1            | 2     | 4       | 1       |
| BLM                 | Q9I920, D3KR64, F1P3V1 | Bloom syndrome protein homolog/BLM helicase           | 0                   | 5     | 5       | 2       | 2            | 1     | 4       | 2       |
| TOPBP1              | E1BSJ5                 | DNA topoisomerase 2-binding protein 1                 | 0                   | 1     | 0       | 1       | 1            | 2     | 0       | 0       |
| RMI1                | Q5ZHV8, F1P2E5         | RecQ-mediated genome instability protein 1            | x                   | x     | x       | x       | x            | x     | x       | x       |
| RMI2                | Q5ZM20                 | RecQ-mediated genome instability protein 2            | 2                   | 0     | 1       | 0       | 1            | 0     | 1       | 0       |
| ATM                 | E1C0Q6, Q9PVT8         | Serine-protein kinase ATM                             | 4                   | 2     | 6       | 6       | 9            | 10    | 7       | 10      |
| ATR/Gga.21455       | F1NGW1                 | Serine/threonine-protein kinase ATR                   | 5                   | 3     | 3       | 6       | 6            | 4     | 7       | 3       |
| ATRIP               | F1NGS1                 | ATR-interacting protein                               | 0                   | 1     | 2       | 1       | 0            | 0     | 3       | 0       |
| <b>CHEK1 (CHK1)</b> | Q8AYC9                 | Serine/threonine-protein kinase Chk1                  | 1                   | 2     | 1       | 4       | 2            | 3     | 1       | 7       |
| CHEK2 (CHK2)        | A1EAT1, F1N864         | Checkpoint and tumor suppressor protein 2             | 2                   | 1     | 0       | 1       | 0            | 1     | 0       | 0       |
| ERCC4/XPF/FANCD1    | F1NAV2                 | DNA repair endonuclease XPF                           | 0                   | 2     | 2       | 2       | 3            | 3     | 1       | 3       |
| EME1                | F1NU84                 | Crossover junction endonuclease EME1                  | 1                   | 0     | 1       | 0       | 1            | 0     | 0       | 1       |
| <b>CDK5</b>         | B6E1W1                 | Cyclin-dependent kinase 5                             | 1                   | 2     | 0       | 4       | 1            | 3     | 2       | 2       |
| RAD18               | F1NVL6, Q5ZIPO         | Postreplication repair E3 ubiquitin-protein ligase    | 2                   | 1     | 2       | 0       | 1            | 0     | 2       | 1       |
| UBE2T               | F1NM75                 | Ubiquitin-conjugating enzyme E2 T                     | 0                   | 0     | 0       | 0       | 1            | 0     | 1       | 0       |
| UBE2W               | F1NEJ6                 | Ubiquitin-conjugating enzyme E2 W                     | 0                   | 0     | 0       | 1       | 0            | 0     | 0       | 1       |
| PRKDC (DNA-PK)      | Q8QGX4, F1NQD1, Q6S5B0 | DNA-dependent protein kinase catalytic subunit        | 4                   | 13    | 6       | 9       | 3            | 10    | 11      | 10      |

Key: rep =replicates, r'cal=reciprocals, **bold** are quantified proteins. Known repair proteins (dark grey), regulatory proteins (light grey), checkpoint proteins (white)
