# Supplementary material for: SILAC-iPAC: A quantitative method for distinguishing genuine from non-specific components of protein complexes by parallel affinity capture
Source: PubMed Central journal article supplement (PMC4329988; doi:10.1016/j.jprot.2014.12.006), 2015-02-06
Supplement: mmc7.pdf [file mmc7.pdf]

**Supplemental Table S3A.** Proteins identified from FLAG pulldowns .

| Protein ID                     | Description                                                    | Gene name      | Ratios       |              |        |              | Log2 ratios   |              |               |               | n        |
|--------------------------------|----------------------------------------------------------------|----------------|--------------|--------------|--------|--------------|---------------|--------------|---------------|---------------|----------|
|                                |                                                                |                | DHJLF4       | JHDLF4       | DHJLF3 | JHDLF3       | DHJLF4        | JHDLF4       | DHJLF3        | JHDLF3        |          |
| <b>Q5F356;F1NKL5</b>           | <b>Phosphatidylinositol-5-phosphate 4-kinase type-2 alpha</b>  | <b>PIP4K2A</b> | <b>0.197</b> | <b>7.489</b> |        | <b>1.371</b> | <b>-2.340</b> | <b>2.905</b> |               | 0.455         | <b>3</b> |
| <b>F1NLK4</b>                  | <b>Uncharacterized protein (Fragment)</b>                      | <b>PIP4K2B</b> | <b>0.126</b> | <b>2.933</b> |        | <b>6.877</b> | <b>-2.988</b> | <b>1.552</b> |               | <b>2.782</b>  | <b>3</b> |
| F1NVR9                         | Uncharacterized protein (Fragment)                             | KCTD14         | 0.443        | 2.913        |        |              | <b>-1.175</b> | <b>1.543</b> |               |               | <b>2</b> |
| F1NCR3;Q5ZIZ4                  | <b>Cytosolic purine 5-nucleotidase</b>                         | NT5C2          | 0.300        | 2.664        | 0.644  | 0.173        | <b>-1.736</b> | <b>1.413</b> | -0.635        | <b>-2.531</b> | <b>4</b> |
| F1NHE3;Q5ZK11                  | Uncharacterized protein                                        | CLIC2          | 0.728        | 2.504        |        |              | -0.457        | <b>1.324</b> |               |               | <b>2</b> |
| E1C8Z7                         | Uncharacterized protein                                        | STK38          | 0.498        | 2.161        |        | 0.781        | <b>-1.005</b> | <b>1.111</b> |               | -0.356        | <b>3</b> |
| P11501;F1NVN4;Q5ZKZ3;Q2XQE5;F  | Heat shock protein HSP 90-alpha                                | HSP90AA1       | 0.664        | 2.074        |        |              | -0.591        | <b>1.052</b> |               |               | <b>2</b> |
| E1C3J7                         | Uncharacterized protein                                        | BTD            | 0.615        | 2.067        | 0.160  | 2.023        | -0.701        | <b>1.047</b> | <b>-2.647</b> | 1.016         | <b>4</b> |
| F1P4H4;Q5ZIM7                  | <b>Uncharacterized protein</b>                                 | TXNDC5         |              | 2.061        | 0.131  | 2.084        |               | <b>1.043</b> | <b>-2.929</b> | 1.059         | <b>3</b> |
| B0FLP0;P31335;Q5U784;Q5U785;Q  | Aminoimidazole-4-carboxamide ribonucleotide transformylase/IMP | PURH           | 0.651        | 1.986        |        |              | -0.618        | <b>0.990</b> |               |               | <b>2</b> |
| F1NHI9;Q5ZHU4                  | 6-phosphofructokinase (Fragment)                               | PFKP           | 0.534        | 1.958        |        |              | <b>-0.904</b> | <b>0.969</b> |               |               | <b>2</b> |
| F1NGE2;P0CG62;F1NAV4;F1NGE3;C  | Ubiquitin (Fragment)                                           | UBB            | 0.399        | 1.953        |        |              | <b>-1.325</b> | <b>0.966</b> |               |               | <b>2</b> |
| F1NWB7;P08110;Q90WA6;B5AAV6    | <b>Endoplasmic reticulum chaperone</b>                         | HSP90B1        | 0.886        | 1.943        |        |              | -0.174        | <b>0.958</b> |               |               | <b>2</b> |
| P00508;F1P180                  | Aspartate aminotransferase, mitochondrial                      | GOT2           | 0.729        | 1.787        | 0.452  | 1.348        | -0.455        | <b>0.838</b> | <b>-1.145</b> | 0.431         | <b>4</b> |
| Q90593                         | <b>78 kDa glucose-regulated protein</b>                        | HSPA5          | 0.570        | 1.737        | 0.667  | 1.402        | <b>-0.812</b> | <b>0.797</b> | -0.585        | 0.487         | <b>4</b> |
| F1P5K7;Q5ZMG9                  | T-complex protein 1 subunit alpha                              | TCP1           | 0.517        | 1.730        | 1.091  |              | <b>-0.952</b> | <b>0.791</b> | 0.126         |               | <b>3</b> |
| F1N8F0;Q9YGM2                  | <b>Delta-9 desaturase</b>                                      | SCD            | 0.764        | 1.709        | 3.001  | 2.267        | -0.388        | <b>0.773</b> | <b>1.585</b>  | 1.181         | <b>4</b> |
| E1C3A9;F1NNX1;P81021           | <b>Vigilin</b>                                                 | HDLBP          | 0.809        | 1.647        |        |              | -0.305        | <b>0.720</b> |               |               | <b>2</b> |
| F1NW35;E1BTT8;P00340           | L-lactate dehydrogenase (Fragment)                             | LDHA           | 1.780        | 1.639        | 1.095  |              | 0.832         | <b>0.713</b> | 0.130         |               | <b>3</b> |
| F1NT20;E1BV95;Q5ZHQ4           | Uncharacterized protein (Fragment)                             | ACAT2          | 0.381        | 1.619        |        |              | <b>-1.394</b> | <b>0.695</b> |               |               | <b>2</b> |
| E5DEA6;E5DFI5;E5DFL1;P18944;Q4 | Cytochrome c oxidase subunit 2 <i>jabouillei</i>               | COX2           | 0.535        | 1.596        |        |              | <b>-0.902</b> | <b>0.674</b> |               |               | <b>2</b> |
| Q6XD56;F1NNR6                  | Uncharacterized protein                                        | ILKAP          |              | 1.573        | 2.310  |              |               | <b>0.654</b> | <b>1.208</b>  |               | <b>2</b> |
| F1P3F9                         | <b>Glutamate dehydrogenase (Fragment)</b>                      | GLUD1          | 0.283        | 1.553        | 1.045  | 0.440        | <b>-1.819</b> | 0.635        | 0.063         | -1.184        | <b>4</b> |
| P15771;F1NU40;F1P336           | Nucleolin                                                      | NCL            | 0.559        | 1.542        | 1.054  | 1.691        | <b>-0.840</b> | 0.625        | 0.075         | 0.758         | <b>4</b> |
| F1NRW7;F1NWP3;O73885;B3VHV2    | Heat shock cognate 71 kDa protein (Fragment)                   | HSPA8          | 0.727        | 1.522        |        |              | -0.459        | 0.605        |               |               | <b>2</b> |
| Q5F3T2                         | Uncharacterized protein                                        | SEPT9          |              | 1.512        | 0.832  | 0.724        |               | 0.597        | -0.266        | -0.466        | <b>3</b> |
| F1NDY9;Q5ZK20                  | <b>Uncharacterized protein</b>                                 | PDIA4          | 0.717        | 1.511        | 0.478  | 0.594        | -0.481        | 0.596        | <b>-1.065</b> | -0.750        | <b>4</b> |
| F1NGA2;F1NI22;Q8UVX3;Q9DDH7;A  | ATP synthase subunit alpha (Fragment)                          | ATP5A1         | 0.698        | 1.501        |        |              | -0.518        | 0.586        |               |               | <b>2</b> |
| P84175                         | 40S ribosomal protein S12                                      | RPS12          | 1.091        | 1.491        |        |              |               | 0.126        | 0.576         |               | <b>2</b> |
| Q5ZMU9;F1P4V8;E1BTS8;E1BZ64    | Valosin containing protein                                     | vcp            | 0.688        | 1.480        | 1.335  | 0.155        | -0.539        | 0.565        | 0.417         | <b>-2.690</b> | <b>4</b> |
| E1C8R1;Q5ZKB9                  | Probable ATP-dependent RNA helicase DDX6                       | DDX6           | 0.537        | 1.478        |        |              | <b>-0.898</b> | 0.564        |               |               | <b>2</b> |
| P22451;F2Z4K4                  | 60S ribosomal protein L5                                       | RPL5           | 0.977        | 1.460        | 1.588  |              | -0.034        | 0.546        | 0.667         |               | <b>3</b> |
| F1N286;Q5ZM98                  | Stress-70 protein, mitochondrial                               | HSPA9          | 0.781        | 1.404        | 0.871  | 1.209        | -0.356        | 0.489        | -0.200        | 0.274         | <b>4</b> |
| F1NWF6;Q5ZJU3                  | Asparagine synthetase [glutamine-hydrolyzing]                  | ASNS           | 1.085        | 1.403        | 0.743  | 4.324        | 0.118         | 0.489        | -0.429        | <b>2.112</b>  | <b>4</b> |
| Q8JFP1;F1NTS2;Q5ZM36;E1BSE5    | Eukaryotic initiation factor 4A-II                             | EIF4A2         | 0.568        | 1.390        |        |              | <b>-0.815</b> | 0.475        |               |               | <b>2</b> |
| F1NY54;F1NEE5;Q5ZMK4           | Uncharacterized protein                                        | THRAP3         | 0.651        | 1.389        | 1.937  | 1.924        | -0.619        | 0.474        | 0.954         | 0.944         | <b>4</b> |
| Q5ZLU8;Q45KQ2                  | Putative uncharacterized protein                               | RCJMB04_4m1    | 0.997        | 1.387        |        |              | -0.004        | 0.472        |               |               | <b>2</b> |
| Q5ZJJ2                         | Replication protein A 70 kDa DNA-binding subunit               | RPA1           | 0.784        | 1.386        | 0.900  | 1.541        | -0.351        | 0.471        | -0.151        | 0.624         | <b>4</b> |

|                             |                                                            |              |       |       |       |       |               |       |               |              |   |
|-----------------------------|------------------------------------------------------------|--------------|-------|-------|-------|-------|---------------|-------|---------------|--------------|---|
| Q5F3L2;F1NYE5;F1NDI3        | Putative uncharacterized protein                           | RCJMB04_14f6 | 0.631 | 1.384 | 0.990 | 0.841 | -0.665        | 0.469 | -0.015        | -0.249       | 4 |
| Q9W7P7;F1NJF0;REV_F1P051    | P32 subunit of splicing factor SF2 (Fragment)              | SF2          | 0.809 | 1.382 | 0.565 |       | -0.306        | 0.466 | <b>-0.823</b> |              | 3 |
| F1NGB1;Q5ZHR1;F1NCP9        | Uncharacterized protein                                    | NUCB2        | 0.979 | 1.356 | 1.750 | 0.297 | -0.030        | 0.439 | 0.807         | -1.751       | 4 |
| F1NTT0;F1N9T0;P23228        | Hydroxymethylglutaryl-CoA synthase, cytoplasmic (Fragment) | HMGCS1       | 0.834 | 1.348 |       |       | -0.261        | 0.431 |               |              | 2 |
| P00368                      | Glutamate dehydrogenase 1, mitochondrial                   | GLUD1        | 0.619 | 1.290 | 0.299 | 0.510 | -0.691        | 0.368 | <b>-1.740</b> | -0.972       | 4 |
| Q90WD0;F1NW48               | Actin-related protein 3                                    | ACTR3        | 0.412 | 1.290 |       |       | <b>-1.278</b> | 0.367 |               |              | 2 |
| P84172                      | Elongation factor Tu, mitochondrial (Fragment)             | TUFM         | 1.302 | 1.288 | 1.480 | 3.082 | 0.381         | 0.366 | 0.566         | <b>1.624</b> | 4 |
| Q5F491;F1NIX1;F1NIX2        | Putative uncharacterized protein                           | RCJMB04_2a4  | 0.707 | 1.286 |       |       | -0.500        | 0.363 |               |              | 2 |
| P21868                      | Casein kinase II subunit alpha                             | CSNK2A1      |       | 1.283 | 1.175 |       |               | 0.360 | 0.233         |              | 2 |
| F1NXY7;Q98TF8;F1N9J4        | 60S ribosomal protein L22 (Fragment)                       | RPL22        | 0.717 | 1.276 | 0.572 |       | -0.480        | 0.352 | <b>-0.807</b> |              | 3 |
| F1N914                      | Uncharacterized protein (Fragment)                         | PYCR2        | 1.577 | 1.272 | 0.572 | 1.307 | 0.657         | 0.347 | <b>-0.806</b> | 0.386        | 4 |
| Q5ZL58                      | Uncharacterized protein                                    | SNRPD3       | 1.264 | 1.260 | 1.231 | 4.892 | 0.338         | 0.333 | 0.300         | <b>2.290</b> | 4 |
| E1BR89;F1NZ24;Q5ZLZ0        | Uncharacterized protein                                    | SLC25A3      | 0.863 | 1.248 |       | 0.452 | -0.212        | 0.320 |               | -1.145       | 3 |
| F1NP63                      | Uncharacterized protein (Fragment)                         | KPNB1        |       | 1.230 | 2.145 | 1.130 |               | 0.299 | 1.101         | 0.177        | 3 |
| Q5F424                      | Uncharacterized protein                                    | CCT2         | 0.870 | 1.227 | 1.291 | 3.498 | -0.201        | 0.295 | 0.368         | <b>1.807</b> | 4 |
| F2Z4M0;Q9W7I5;Q9I8G9        | Histone-binding protein RBBP4                              | RBBP4        | 0.661 | 1.224 | 1.912 | 0.504 | -0.597        | 0.291 | 0.935         | -0.987       | 4 |
| E1BT08;E1C0H5;F1NC26;Q5F3J8 | Uncharacterized protein                                    | HSPH1        | 1.008 | 1.220 |       |       | 0.012         | 0.287 |               |              | 2 |
| F1N9X5;Q5ZJC1;F1NPA9;Q6EE58 | Uncharacterized protein                                    | RPS3         | 1.023 | 1.219 | 1.069 | 1.104 | 0.032         | 0.285 | 0.097         | 0.143        | 4 |
| Q6EE30                      | Eukaryotic translation elongation factor 1                 | eTEF1        | 0.581 | 1.211 | 1.622 | 0.858 | <b>-0.783</b> | 0.276 | 0.698         | -0.222       | 4 |
| P18359                      | Dextrin                                                    | DSTN         | 1.138 | 1.196 | 0.438 | 0.569 | 0.187         | 0.258 | <b>-1.192</b> | -0.814       | 4 |
| Q5ZL34;F1NGU9               | Cleavage and polyadenylation specificity factor subunit 6  | CPSF6        | 1.383 | 1.180 | 1.468 |       | 0.468         | 0.239 | 0.554         |              | 3 |
| F1NU36;F1NDD6;O57378        | Uncharacterized protein (Fragment)                         | LRPAP1       | 1.017 | 1.177 |       | 0.344 | 0.025         | 0.235 |               | -1.540       | 3 |
| Q5ZLC5                      | ATP synthase subunit beta, mitochondrial                   | ATP5B        | 0.632 | 1.176 | 1.074 | 0.647 | -0.662        | 0.233 | 0.103         | -0.627       | 4 |
| O57535;F1N910;F1P3E1;F1NC40 | Nucleoside diphosphate kinase                              | NDK          | 0.752 | 1.169 |       |       | -0.411        | 0.225 |               |              | 2 |
| F1NKN0;Q5F411               | Uncharacterized protein (Fragment)                         | CCT5         | 0.642 | 1.156 | 1.668 | 4.373 | -0.639        | 0.209 | 0.738         | <b>2.129</b> | 4 |
| P00548                      | Pyruvate kinase muscle isozyme                             | PKM2         | 0.640 | 1.152 | 1.050 | 4.959 | -0.643        | 0.204 | 0.070         | <b>2.310</b> | 4 |
| P08636;F1P597;F1NY38        | 40S ribosomal protein S17                                  | RPS17        | 1.000 | 1.151 | 0.876 |       | 0.000         | 0.203 | -0.191        |              | 3 |
| F1NLS0;Q9DEA3               | Proliferating cell nuclear antigen (Fragment)              | PCNA         | 0.997 | 1.151 | 1.043 | 0.936 | -0.004        | 0.203 | 0.061         | -0.096       | 4 |
| Q5ZMD1;Q5ZM05;F1NSY6        | 14-3-3 protein theta                                       | YWHAQ        | 0.910 | 1.147 | 1.129 |       | -0.135        | 0.198 | 0.175         |              | 3 |
| F1NHL2                      | ubiquitin ligase complex                                   | CAND1        |       | 1.144 | 0.472 |       |               | 0.194 | <b>-1.084</b> |              | 2 |
| F1P010                      | Uncharacterized protein (Fragment)                         | ARPC4        | 0.667 | 1.141 |       |       | -0.584        | 0.190 |               |              | 2 |
| F1NH93                      | Uncharacterized protein (Fragment)                         | RPS20        | 0.907 | 1.141 | 0.769 | 0.509 | -0.140        | 0.190 | -0.378        | -0.973       | 4 |
| F1NW43;F1P4U1               | Pyruvate kinase (Fragment)                                 | PKM2         | 0.884 | 1.140 | 0.641 | 3.461 | -0.177        | 0.189 | -0.641        | <b>1.791</b> | 4 |
| F1NEV9;P42558               | GTP-binding nuclear protein Ran (Fragment)                 | RAN          | 1.392 | 1.136 | 0.469 | 0.548 | 0.477         | 0.184 | <b>-1.092</b> | -0.868       | 4 |
| Q5ZLG7;Q8AYM3;F1NFF6;F1NBW8 | Putative uncharacterized protein                           | RCJMB04_6000 | 0.943 | 1.132 | 0.876 |       | -0.085        | 0.179 | -0.191        |              | 3 |
| E1C8Q3                      | Uncharacterized protein                                    | ALDH18A1     |       | 1.131 | 1.896 | 3.706 |               | 0.178 | 0.923         | <b>1.890</b> | 3 |
| F1NPG8;Q9I8D6;Q5ZMG3        | T-complex protein 1 subunit delta (Fragment)               | CCT4         | 0.674 | 1.128 | 1.157 | 4.729 | -0.570        | 0.173 | 0.210         | <b>2.242</b> | 4 |
| E1BUZ8                      | Uncharacterized protein                                    | RPL9         | 1.101 | 1.122 |       |       | 0.139         | 0.167 |               |              | 2 |
| Q5ZJ54;F1NWH9               | T-complex protein 1 subunit zeta                           | CCT6         | 0.588 | 1.122 |       | 3.707 | <b>-0.765</b> | 0.166 |               | <b>1.890</b> | 3 |
| F1NBU1                      | Uncharacterized protein (Fragment)                         | RPS16        | 0.887 | 1.120 | 1.183 | 0.948 | -0.173        | 0.163 | 0.242         | -0.077       | 4 |

|                                |                                                                     |                    |       |       |       |       |        |        |        |        |   |
|--------------------------------|---------------------------------------------------------------------|--------------------|-------|-------|-------|-------|--------|--------|--------|--------|---|
| G1K332;F1NCK6;P62801;P70081;Q6 | Histone H4 (Fragment)                                               | H4                 | 0.922 | 1.117 | 1.447 | 1.687 | -0.117 | 0.159  | 0.533  | 0.755  | 4 |
| P53488;F1NHN5;F1NRM5           | Actin-related protein 2                                             | ACTR2              | 0.297 | 1.115 | 0.404 | 0.628 | -1.749 | 0.157  | -1.309 | -0.671 | 4 |
| G8JL27;P63247                  | Guanine nucleotide-binding protein subunit beta-2-like 1 (Fragment) | GNB2L1             | 1.006 | 1.114 | 1.184 | 4.849 | 0.009  | 0.155  | 0.244  | 2.278  | 4 |
| Q6EE62                         | Ribosomal protein (Fragment)                                        | RPL10A             | 0.958 | 1.101 | 1.612 | 1.383 | -0.062 | 0.138  | 0.689  | 0.468  | 4 |
| F1NK96;F1N966;Q5F472           | Uncharacterized protein                                             | PDIA6              | 0.799 | 1.099 | 0.521 | 1.054 | -0.323 | 0.136  | -0.942 | 0.076  | 4 |
| E1C4N0                         | Uncharacterized protein                                             | RPS10              | 0.899 | 1.096 | 0.449 | 0.798 | -0.154 | 0.133  | -1.154 | -0.326 | 4 |
| Q98906                         | Microtubule-associated protein (Fragment)                           | MAP4               | 0.709 | 1.095 |       |       | -0.495 | 0.131  |        |        | 2 |
| Q5ZLX2                         | Eukaryotic translation initiation factor 2 subunit 1                | EIF2S1             | 1.389 | 1.093 | 1.494 | 3.288 | 0.474  | 0.128  | 0.579  | 1.717  | 4 |
| E1BZG4                         | Uncharacterized protein                                             | EEF1D              | 1.165 | 1.089 | 1.035 |       | 0.220  | 0.122  | 0.049  |        | 3 |
| F1NU17;P51903                  | Phosphoglycerate kinase                                             | PGK1               | 0.920 | 1.078 | 0.368 | 0.827 | -0.120 | 0.108  | -1.441 | -0.275 | 4 |
| P47826;F1NB66                  | 60S acidic ribosomal protein P0                                     | RPLP0              | 0.972 | 1.075 | 1.128 | 2.443 | -0.041 | 0.105  | 0.174  | 1.289  | 4 |
| Q5ZL82                         | Uncharacterized protein                                             | HSDL2              |       | 1.072 | 0.721 |       |        | 0.100  | -0.472 |        | 2 |
| F1NVF0;Q5ZL51                  | Uncharacterized protein                                             | VPS35              | 0.874 | 1.071 | 1.538 | 0.916 | -0.195 | 0.098  | 0.621  | -0.127 | 4 |
| Q9IAY5                         | Protein syndesmos                                                   | SDOS               | 0.840 | 1.070 | 0.983 | 0.595 | -0.251 | 0.097  | -0.025 | -0.750 | 4 |
| Q5ZL72                         | 60 kDa heat shock protein, mitochondrial                            | HSPD1              | 0.544 | 1.068 |       | 1.562 | -0.878 | 0.095  |        | 0.643  | 3 |
| F1NC02                         | Proteasome subunit alpha type (Fragment)                            | PSMA4              | 1.809 | 1.064 |       | 2.831 | 0.855  | 0.090  |        | 1.501  | 3 |
| Q5ZLR5                         | Cytochrome b-c1 complex subunit Rieske, mitochondrial               | UQCRRF51           | 0.978 | 1.064 | 2.269 | 2.915 | -0.032 | 0.090  | 1.182  | 1.544  | 4 |
| Q5ZKM2;Q90835;F1N9H4;Q6PTX1    | Elongation factor 1-alpha                                           | EEF1A1             | 0.749 | 1.057 | 0.504 | 1.074 | -0.417 | 0.080  | -0.989 | 0.102  | 4 |
| F1NK29;Q5ZM14                  | Na(+)/H(+) exchange regulatory cofactor NHE-RF1                     | SLC9A3R1           | 0.611 | 1.057 |       |       | -0.710 | 0.079  |        |        | 2 |
| E1BXS5                         | Uncharacterized protein                                             | DECR1              | 1.662 | 1.055 | 0.971 | 1.770 | 0.733  | 0.077  | -0.043 | 0.824  | 4 |
| E1C4M0                         | Uncharacterized protein                                             | RPS2               | 0.969 | 1.053 | 1.254 | 2.095 | -0.046 | 0.074  | 0.326  | 1.067  | 4 |
| Q90679                         | Thymocyte nuclear protein 1                                         | THYN1              | 0.779 | 1.053 | 0.688 | 0.736 | -0.361 | 0.074  | -0.539 | -0.442 | 4 |
| E1BV44                         | Uncharacterized protein (exportin)                                  | CSE1L              | 0.571 | 1.050 | 0.721 | 0.760 | -0.807 | 0.070  | -0.471 | -0.396 | 4 |
| F1NCI4;Q5ZJ56;F1NCI6           | 60S ribosomal protein L7 (Fragment)                                 | RPL7               | 0.846 | 1.046 | 1.345 |       | -0.242 | 0.064  | 0.427  |        | 3 |
| F1NU56                         | Uncharacterized protein (Fragment)                                  | RPS25              | 1.019 | 1.041 | 0.777 |       | 0.027  | 0.058  | -0.364 |        | 3 |
| F1P1A8                         | Uncharacterized protein (Fragment)                                  | SMARCC1            |       | 1.041 | 1.207 | 0.810 |        | 0.058  | 0.271  | -0.304 | 3 |
| Q5ZKC9;F1NPX9;Q9PS14           | 14-3-3 protein zeta                                                 | YWHAZ              | 0.808 | 1.034 | 1.263 |       | -0.307 | 0.048  | 0.337  |        | 3 |
| F1NV05;F1NIJ6;Q5ZMU3;CON__Q3   | Glucose-6-phosphate isomerase (Fragment)                            | GPI                | 1.059 | 1.028 |       | 1.077 | 0.083  | 0.039  |        | 0.107  | 3 |
| Q5ZLH1                         | Uncharacterized protein                                             | RPA2               | 1.168 | 1.026 | 0.426 | 1.449 | 0.224  | 0.037  | -1.231 | 0.535  | 4 |
| E1C8W4                         | Ubiquitin carboxyl-terminal hydrolase                               | USP5               |       | 1.013 | 0.888 | 0.503 |        | 0.019  | -0.171 | -0.990 | 3 |
| E1BSD8                         | Uncharacterized protein                                             | POLR2H             | 0.639 | 1.008 | 1.530 |       | -0.647 | 0.011  | 0.614  |        | 3 |
| F1NLM5                         | Uncharacterized protein (Fragment)                                  | SNRPD1             | 0.768 | 1.005 | 0.965 |       | -0.382 | 0.007  | -0.052 |        | 3 |
| Q5ZIT7;F1P3L9;F1NDQ1           | Putative uncharacterized protein                                    | RCJMB04_23k2/PSMC3 |       | 1.002 | 1.376 | 1.035 |        | 0.003  | 0.461  | 0.050  | 3 |
| E1BTG1                         | Uncharacterized protein                                             | RPL12              | 1.333 | 0.993 | 0.786 | 1.986 | 0.414  | -0.011 | -0.348 | 0.990  | 4 |
| F1NW84;F1NVA4;P16039;Q6LEK3;F  | Nucleophosmin (Fragment)                                            | NPM1               | 0.916 | 0.991 |       |       | -0.126 | -0.013 |        |        | 2 |
| B0LVF9;B0LVG0;F1NUN1           | Microtubule-associated protein                                      | MAPT               | 0.925 | 0.989 |       |       | -0.113 | -0.016 |        |        | 2 |
| F1P304                         | Uncharacterized protein (Fragment)                                  | ATP5O              | 0.799 | 0.989 | 1.409 |       | -0.323 | -0.016 | 0.495  |        | 3 |
| F1P1A5                         | Uncharacterized protein (Fragment)                                  | TKT                | 1.057 | 0.987 | 0.758 | 4.713 | 0.080  | -0.019 | -0.399 | 2.237  | 4 |
| F1NBD7;P13863;F1NA68;A2IAR9;B6 | Uncharacterized protein                                             | CDC2               | 1.039 | 0.986 | 1.038 | 1.768 | 0.055  | -0.020 | 0.054  | 0.822  | 4 |
| P00356;F1NH87                  | Glyceraldehyde-3-phosphate dehydrogenase (Fragment)                 | GAPDH              |       | 0.978 | 0.322 | 1.451 |        | -0.032 | -1.637 | 0.537  | 3 |

|                               |                                                                   |         |       |       |       |       |               |        |               |               |   |
|-------------------------------|-------------------------------------------------------------------|---------|-------|-------|-------|-------|---------------|--------|---------------|---------------|---|
| DOEKR3                        | Peptidyl-prolyl cis-trans isomerase                               | PPCTI   | 0.740 | 0.976 | 0.182 | 2.071 | -0.435        | -0.035 | <b>-2.458</b> | 1.050         | 4 |
| Q5ZIZ5                        | Uncharacterized protein                                           | NONO    | 1.144 | 0.966 | 2.834 | 1.516 | 0.194         | -0.050 | <b>1.503</b>  | 0.600         | 4 |
| F1NN16                        | Uncharacterized protein (Fragment)                                | RPS7    | 0.943 | 0.966 | 0.663 | 0.362 | -0.085        | -0.050 | -0.592        | <b>-1.467</b> | 4 |
| Q5ZJK8;F1NK38;F1NZN1          | T-complex protein 1 subunit eta                                   | CCT7    | 0.537 | 0.957 |       | 3.234 | <b>-0.898</b> | -0.063 |               | <b>1.693</b>  | 3 |
| Q98TH5;F1N9W9;F1P553          | Ribosomal protein S11                                             | cRPS11  | 0.928 | 0.956 | 1.588 |       | -0.107        | -0.065 | 0.667         |               | 3 |
| F1NB02;Q6EE57                 | 40S ribosomal protein S8 (Fragment)                               | RPS8    | 1.012 | 0.955 | 1.665 | 2.717 | 0.017         | -0.066 | 0.736         | 1.442         | 4 |
| F1N8Z4;Q5ZIC4                 | Uncharacterized protein                                           | RUVBL1  |       | 0.949 | 1.283 | 3.515 |               | -0.076 | 0.360         | <b>1.814</b>  | 3 |
| F1NRB9;P09645;F1NUP6          | Uncharacterized protein (Fragment)                                | LONP1   |       | 0.944 | 1.525 |       |               | -0.083 | 0.609         |               | 2 |
| P47836;F1NFC6;F1POF2;REV__F1N | 40S ribosomal protein S4                                          | RPS4    | 0.945 | 0.944 | 0.949 | 0.554 | -0.082        | -0.083 | -0.075        | <b>-0.851</b> | 4 |
| Q5ZMQ2;Q5ZLX9                 | Actin, cytoplasmic 2                                              | ACTG1   | 0.462 | 0.943 |       |       | <b>-1.115</b> | -0.084 |               |               | 2 |
| E1BYM1                        | mRNA cap guanine-N7 methyltransferase                             | RNMT    | 1.035 | 0.940 | 1.303 | 0.525 | 0.049         | -0.089 | 0.382         | <b>-0.930</b> | 4 |
| Q5ZHW8                        | Uncharacterized protein                                           | RPS14   | 0.776 | 0.935 | 1.303 | 0.473 | -0.365        | -0.096 | 0.382         | <b>-1.081</b> | 4 |
| F1P1K3                        | Uncharacterized protein (Fragment)                                | ARPC2   | 0.674 | 0.935 |       | 0.730 | -0.570        | -0.097 |               | <b>-0.455</b> | 3 |
| E1BXA2;P13127;Q5ZLP3          | F-actin-capping protein subunit alpha-1                           | CAPZA1  | 0.473 | 0.932 |       |       | <b>-1.080</b> | -0.101 |               |               | 2 |
| F1NTC7;Q98TF9                 | Uncharacterized protein (Fragment)                                | RPL14   | 1.028 | 0.930 | 1.580 |       | 0.040         | -0.105 | 0.660         |               | 3 |
| F1NDC2                        | Uncharacterized protein (Fragment)                                | RPS23   | 0.875 | 0.928 | 2.276 |       | -0.192        | -0.108 | <b>1.186</b>  |               | 3 |
| Q6ITC7;F1NGB4;REV__E1C1R6     | 40S ribosomal protein S13                                         | RPS13   | 0.895 | 0.926 | 1.358 |       | -0.159        | -0.111 | 0.441         |               | 3 |
| Q5ZKA5                        | Bifunctional methylenetetrahydrofolate dehydrogenase/cyclohydro   | MTHFD2  |       | 0.918 | 0.658 | 1.087 |               | -0.124 | -0.603        | 0.120         | 3 |
| E1C8F7                        | Uncharacterized protein                                           | RPL24   | 0.818 | 0.907 | 0.746 |       | -0.289        | -0.142 | -0.423        |               | 3 |
| E1C658                        | Uncharacterized protein                                           | ATP5H   | 0.501 | 0.900 | 1.528 |       | <b>-0.996</b> | -0.152 | 0.612         |               | 3 |
| F1NPD3                        | Uncharacterized protein (Fragment)                                | RPL18A  | 1.000 | 0.898 | 2.660 |       | 0.000         | -0.155 | <b>1.411</b>  |               | 3 |
| F1NIX0                        | Uncharacterized protein (Fragment)                                | RPL8    | 1.102 | 0.891 | 0.968 |       | 0.140         | -0.166 | -0.047        |               | 3 |
| Q5ZLN1;F1NHM9;F1NQ41          | Phosphoglycerate mutase 1                                         | PGAM1   | 0.529 | 0.888 | 0.300 | 3.337 | <b>-0.920</b> | -0.171 | <b>-1.736</b> | <b>1.739</b>  | 4 |
| D0VX26                        | Mitochondrial cytochrome c1, heme protein                         | MCC1    | 0.929 | 0.888 | 1.718 | 0.999 | -0.106        | -0.172 | 0.781         | <b>-0.001</b> | 4 |
| Q90602;F1NIB2;F1NIB4;Q90626   | Single stranded D box binding factor                              | HNRNPAB | 0.697 | 0.884 | 0.953 | 1.691 | -0.520        | -0.178 | -0.070        | 0.758         | 4 |
| G1K326;P0CB50                 | Peroxiredoxin-1 (Fragment)                                        | PRDX1   | 0.944 | 0.879 | 2.206 | 1.941 | -0.083        | -0.186 | <b>1.141</b>  | 0.957         | 4 |
| F1P4V6                        | Uncharacterized protein (Fragment)                                | RPL31   | 1.003 | 0.872 | 1.014 |       | 0.004         | -0.198 | 0.020         |               | 3 |
| F1N941;E1C0S2;Q5ZK88          | Paraspeckle component 1                                           | PSPC1   |       | 0.870 | 2.130 | 2.372 |               | -0.201 | <b>1.091</b>  | 1.246         | 3 |
| Q5F4A4;E1C707;Q5ZLI1;F1N808   | Inosine-5-monophosphate dehydrogenase                             | IMPDH2  | 1.128 | 0.869 | 0.647 | 0.925 | 0.173         | -0.202 | -0.629        | <b>-0.113</b> | 4 |
| E1C1X6                        | Uncharacterized protein                                           | MOB2    | 0.886 | 0.859 |       |       | -0.175        | -0.220 |               |               | 2 |
| E1C2C3                        | Uncharacterized protein                                           | SF3B1   |       | 0.859 | 1.505 | 5.177 |               | -0.220 | 0.589         | <b>2.372</b>  | 3 |
| Q5F426                        | Uncharacterized protein                                           | PDHA1   |       | 0.856 | 1.199 | 0.878 |               | -0.225 | 0.262         | <b>-0.188</b> | 3 |
| Q5ZK62;F1NG96;F1NGZ5          | Arf-GAP with coiled-coil, ANK repeat and PH domain-containing pro | ACAP2   | 0.658 | 0.852 |       | 0.155 | -0.604        | -0.231 |               | <b>-2.691</b> | 3 |
| P00940                        | Triosephosphate isomerase                                         | TPI1    | 1.022 | 0.851 | 0.339 |       | 0.031         | -0.233 | <b>-1.561</b> |               | 3 |
| F1NXW3                        | Uncharacterized protein (Fragment)                                | RPS15A  | 1.059 | 0.848 | 0.724 |       | 0.083         | -0.237 | -0.465        |               | 3 |
| F1P555;Q91017                 | Uncharacterized protein                                           | SFPQ    | 0.921 | 0.848 | 1.959 | 1.813 | -0.118        | -0.238 | <b>0.970</b>  | 0.858         | 4 |
| Q90WG1;Q90WG2;F1NMV1;F1NCT    | Spindlin-Z                                                        | SPINZ   | 1.524 | 0.843 |       | 0.666 | 0.608         | -0.246 |               | <b>-0.587</b> | 3 |
| P00337                        | L-lactate dehydrogenase B chain                                   | LDHB    | 0.583 | 0.836 | 0.220 | 4.532 | <b>-0.779</b> | -0.259 | <b>-2.185</b> | <b>2.180</b>  | 4 |
| F1NEG6;F1NJJ5;Q6WNG8;F1NJJ4;Q | Uncharacterized protein                                           | HNRNPH1 | 0.919 | 0.828 |       | 4.256 | -0.122        | -0.272 |               | <b>2.090</b>  | 3 |
| P67883;G1K316                 | 60S ribosomal protein L30                                         | RPL30   | 0.844 | 0.822 | 0.548 |       | -0.245        | -0.283 | <b>-0.869</b> |               | 3 |

|                                |                                                                 |                |       |       |       |       |               |        |               |              |   |
|--------------------------------|-----------------------------------------------------------------|----------------|-------|-------|-------|-------|---------------|--------|---------------|--------------|---|
| E1BSL7                         | Uncharacterized protein                                         | ERP44          |       | 0.818 | 1.206 | 0.794 |               | -0.289 | 0.270         | -0.332       | 3 |
| E1BSS3                         | Uncharacterized protein                                         | EIF3A          | 1.321 | 0.814 |       | 0.279 | 0.402         | -0.298 |               | -1.841       | 3 |
| F1NUY0;F1NUX9                  | Uncharacterized protein (Fragment)                              | C2orf56        | 0.472 | 0.804 |       |       | <b>-1.082</b> | -0.315 |               |              | 2 |
| F1NHA8;P32429;F2Z4L5           | 60S ribosomal protein L7a (Fragment)                            | RPL7A          | 0.970 | 0.799 |       |       | -0.043        | -0.324 |               |              | 2 |
| P09244                         | Tubulin beta-7 chain                                            | TUBB7          | 1.315 | 0.798 | 1.348 |       | 0.395         | -0.325 | 0.430         |              | 3 |
| Q5F3D2                         | Uncharacterized protein                                         | HNRNPH3        | 1.016 | 0.789 | 1.102 | 2.367 | 0.023         | -0.341 | 0.139         | 1.243        | 4 |
| F1NQG5;F1P118;P51417           | Ribosomal protein L15 (Fragment)                                | RPL15          | 0.950 | 0.784 | 1.474 |       | -0.074        | -0.350 | 0.560         |              | 3 |
| Q5ZH20                         | Spliceosome RNA helicase DDX39B                                 | DDX39B         |       | 0.771 | 0.982 | 0.606 |               | -0.376 | -0.026        | -0.722       | 3 |
| P50890;Q6SVA6;F1NKH1           | 40S ribosomal protein SA                                        | RPSA           | 1.137 | 0.759 | 0.631 | 0.888 | 0.185         | -0.398 | -0.664        | -0.172       | 4 |
| E1B XK5;Q5F3M2                 | Uncharacterized protein                                         | RBM5           | 1.348 | 0.756 |       | 0.524 | 0.431         | -0.404 |               | -0.933       | 3 |
| F1NX13;Q5H7M6                  | Uncharacterized protein                                         | DRG1           |       | 0.724 | 0.869 | 1.576 |               | -0.466 | -0.203        | 0.656        | 3 |
| Q5ZLE6                         | Eukaryotic translation initiation factor 3 subunit H            | EIF3H          | 1.100 | 0.706 | 0.927 |       | 0.137         | -0.501 | -0.110        |              | 3 |
| F1ND80;Q5F428                  | Uncharacterized protein (Fragment)                              | EIF3EIP        | 0.844 | 0.701 | 3.119 |       | -0.245        | -0.513 | 1.641         |              | 3 |
| F1NLO5;P26446;F1P5K6;F1NL24;Q9 | Poly [ADP-ribose] polymerase 1                                  | PARP1          | 2.145 | 0.685 | 2.026 |       | 1.101         | -0.546 | 1.019         |              | 3 |
| O92956;A2SXN8;B1Q2X9;E2G6M3;I  | Avian RSVSB Gag-Pro-Pol polyprotein                             | RAV-0;SE21Q1b; | 1.149 | 0.608 |       |       | 0.200         | -0.718 |               |              | 2 |
| F1NZE2;Q5ZJ64                  | Eukaryotic translation initiation factor 3 subunit M (Fragment) | EIF3M          | 1.190 | 0.603 | 1.673 | 0.812 | 0.251         | -0.731 | 0.742         | -0.301       | 4 |
| E1BZE6;F1NBB6;F1P5I0           | Uncharacterized protein                                         | HNRNPA3        |       | 0.603 | 3.051 | 3.155 |               | -0.731 | 1.609         | <b>1.658</b> | 3 |
| Q5F3C0;E1BVJ5                  | Putative uncharacterized protein                                | RCJMB04_22h1   |       | 0.540 | 2.926 | 1.889 |               | -0.888 | 1.549         | 0.918        | 3 |
| E1C2E1;E1C2E2;F1P1V1;Q5ZLR3    | Uncharacterized protein                                         | STK38L         | 1.494 | 0.485 |       |       | 0.579         | -1.045 |               |              | 2 |
| E1BYN9                         | Uncharacterized protein                                         | PRPSAP1        | 4.118 | 0.447 |       |       | 2.042         | -1.162 |               |              | 2 |
| F1NCM5;Q5ZII4                  | Uncharacterized protein                                         | LTB4DH         | 2.216 | 0.443 |       | 0.845 | 1.148         | -1.174 |               | -0.242       | 3 |
| E1C6D1;E1BXF5                  | Microtubule-associated protein                                  | MAP2           | 2.079 | 0.413 | 1.784 |       | 1.056         | -1.276 | 0.835         |              | 3 |
| F1NZC6;Q5ZL26                  | Phosphoribosyl pyrophosphate synthase-associated protein 2      | PRPSAP2        | 3.411 | 0.184 |       |       | 1.770         | -2.441 |               |              | 2 |
| P14105;F1NCD4;F1NXC9;Q7LZ83    | Myosin-9                                                        | MYH9           | 0.517 |       | 0.957 |       | <b>-0.953</b> |        | -0.063        |              | 2 |
| F1NIN4;P24032;P02612;E1C6R9    | Uncharacterized protein (Fragment)                              | MYL12A         | 0.561 |       | 1.401 |       | <b>-0.834</b> |        | 0.487         |              | 2 |
| Q5ZL53;F1NH81;F1NH82;E1BWJ7;E  | Putative uncharacterized protein                                | RCJMB04_7I20   | 0.615 |       |       | 0.670 | -0.701        |        |               | -0.577       | 2 |
| P12276-2;E1BW07;F1N8A8;P12276  | Isoform 1 of Fatty acid synthase                                | FASN           | 0.667 |       | 2.124 |       | -0.585        |        | 1.086         |              | 2 |
| Q5ZMN1;E1C769                  | Uncharacterized protein                                         | G3BP1          | 0.710 |       | 2.067 |       | -0.494        |        | 1.047         |              | 2 |
| F1NXA5;Q5ZI60;Q5ZM02;Q5ZLS1;F  | Uncharacterized protein (Fragment)                              | CORO1C         | 0.749 |       | 0.944 |       | -0.416        |        | -0.083        |              | 2 |
| F1NDI7;F1NC33;Q04619           | Heat shock cognate protein HSP 90-beta (Fragment)               | HSP90AB1       | 0.808 |       | 0.704 | 0.573 | -0.307        |        | -0.507        | -0.803       | 3 |
| F1NHF1                         | Uncharacterized protein (Fragment)                              | ATP5J2         | 0.819 |       | 0.787 |       | -0.288        |        | -0.345        |              | 2 |
| Q5ZMN3;F1N833;F1NPZ8           | Prohibitin-2                                                    | PHB2           | 0.859 |       | 1.429 | 1.116 | -0.219        |        | 0.515         | 0.159        | 3 |
| G1K331;G1K329;P84229;C6ZL36;Q  | Histone H3 (Fragment)                                           | LOC417953      | 0.870 |       |       | 1.599 | -0.202        |        |               | 0.677        | 2 |
| Q5ZHY1;F1NYA9;Q9YGQ1           | Putative uncharacterized protein                                | RCJMB04_32c11  | 0.905 |       | 0.721 |       | -0.144        |        | -0.472        |              | 2 |
| F1NLT9;F1NCL1;F1NDS3;P02263;Q  | Histone H2A (Fragment)                                          | HIST2H2AC      | 0.908 |       |       | 3.209 | -0.139        |        |               | <b>1.682</b> | 2 |
| Q09121;Q07460;G1K322           | <b>Eukaryotic translation initiation factor 5A-1</b>            | EIF5A1         | 0.921 |       | 0.548 |       | -0.119        |        | <b>-0.868</b> |              | 2 |
| F1NSP8;F1NM96;Q2MHD2           | Uncharacterized protein (Fragment)                              | HNRNPU         | 0.959 |       | 2.498 | 1.216 | -0.061        |        | 1.321         | 0.282        | 3 |
| P61355                         | 60S ribosomal protein L27                                       | RPL27          | 0.975 |       | 1.637 |       | -0.036        |        | 0.711         |              | 2 |
| P02272;Q5ZMD6;F2Z4M5           | Histone H2A.V                                                   | H2AFV          | 0.976 |       | 0.785 | 1.103 | -0.035        |        | -0.350        | 0.141        | 3 |
| E1BW78                         | Uncharacterized protein                                         | COX6C          | 0.982 |       | 1.905 |       | -0.026        |        | 0.930         |              | 2 |

|                               |                                                                 |              |       |  |       |       |        |        |        |        |        |  |
|-------------------------------|-----------------------------------------------------------------|--------------|-------|--|-------|-------|--------|--------|--------|--------|--------|--|
| E1BS06                        | Uncharacterized protein                                         | RPL23A       | 0.987 |  | 0.611 |       | -0.019 |        | -0.711 |        | 2      |  |
| F2Z4K7;Q5ZK27                 | Uncharacterized protein                                         | RPS3A        | 1.000 |  | 1.269 |       | -0.001 |        | 0.344  |        | 2      |  |
| A3RL83;Q5ZMNO                 | Lectin-associated matrix protein (Fragment)                     | hLAMP-1      | 1.034 |  |       | 1.509 | 0.048  |        |        | 0.594  | 2      |  |
| F1NNC3;P62846;F2Z4M3          | 40S ribosomal protein S15 (Fragment)                            | RPS15        | 1.068 |  | 3.046 |       | 0.095  |        | 1.607  |        | 2      |  |
| P62207;Q5ZL39;Q9PSQ6          | Serine/threonine-protein phosphatase PP1-beta catalytic subunit | PPP1CB       | 1.069 |  |       | 1.854 | 0.097  |        |        | 0.891  | 2      |  |
| F1NG53;Q6EE61                 | Uncharacterized protein (Fragment)                              | RPL17L       | 1.073 |  | 1.206 |       | 0.102  |        | 0.271  |        | 2      |  |
| F1NP85                        | Uncharacterized protein (Fragment)                              | RPL21        | 1.080 |  | 1.046 |       | 0.111  |        | 0.065  |        | 2      |  |
| P0C1H5;F1NF30                 | Histone H2B 7                                                   | H2B-VII      | 1.118 |  | 1.692 |       | 0.161  |        | 0.759  |        | 2      |  |
| F1NE72;Q5ZKP8;E1C3E0;Q8JGU2;R | Lysyl-tRNA synthetase                                           | KARS         | 1.164 |  | 2.303 |       | 0.219  |        | 1.203  |        | 2      |  |
| F1P179;Q5ZJ86                 | Uncharacterized protein                                         | EPRS         | 1.172 |  | 1.116 |       | 0.229  |        | 0.159  |        | 2      |  |
| E1BW50;Q5ZHU8                 | Uncharacterized protein                                         | CTNBL1       | 1.175 |  | 1.839 |       | 0.232  |        | 0.879  |        | 2      |  |
| Q9PV94                        | Small nuclear ribonucleoprotein-associated protein B            | SNRPB        | 1.181 |  | 1.046 | 1.339 | 0.241  |        | 0.065  | 0.421  | 3      |  |
| F1P0E4;Q9I9D1;E1BYN7          | Uncharacterized protein (Fragment)                              | VDAC2        | 1.186 |  | 0.973 | 2.975 | 0.246  |        | -0.040 | 1.573  | 3      |  |
| Q5ZME1                        | Uncharacterized protein                                         | HNRNPA2B1    | 1.186 |  | 2.267 | 3.067 | 0.246  |        | 1.181  | 1.617  | 3      |  |
| E1C2L5                        | Uncharacterized protein                                         | THOC4        | 1.193 |  | 0.736 | 0.358 | 0.254  |        | -0.443 | -1.484 | 3      |  |
| F1N9U8;Q5ZIX2;E1BZW5          | Uncharacterized protein                                         | ETFA         | 1.197 |  | 0.620 | 0.769 | 0.259  |        | -0.689 | -0.380 | 3      |  |
| Q5ZM66                        | Putative uncharacterized protein                                | RCJMB04_2p17 | 1.225 |  | 0.579 |       | 0.292  |        | -0.788 |        | 2      |  |
| F1NG68                        | Uncharacterized protein (Fragment)                              | DECR2        | 1.274 |  |       | 0.287 | 0.349  |        |        | -1.799 | 2      |  |
| Q5ZMT0;F1NGW3;F1P2P9;F1P2Q0   | 14-3-3 protein epsilon                                          | YWHAE        | 1.295 |  |       | 0.906 | 0.373  |        |        | -0.143 | 2      |  |
| E1BV75                        | Uncharacterized protein                                         | DHRS7        | 2.512 |  | 2.667 | 4.595 | 1.329  |        | 1.415  | 2.200  | 3      |  |
|                               |                                                                 |              |       |  |       |       | median | -0.138 | 0.192  | -0.025 | 0.107  |  |
|                               |                                                                 |              |       |  |       |       | 1sd    | 0.6059 | 0.5403 | 0.8619 | 1.1866 |  |
|                               |                                                                 |              |       |  |       |       | med+/- | -0.701 | 2.090  | 0.282  | 2.076  |  |

Key: **Bold** indicates ratio +/- 1sd of median. Heatmap annotation identifies enriched high confidence ratios (green) decreasing to low confidence or contradictory ratios (red). Green proteins are those also found in Talon pulldowns

**Supplemental Table S3B.** Proteins identified from Talon pulldowns .

| Protein IDs                   | Description                                                   | Gene                  | Ratios       |        |              |              | Log2 ratios   |        |               |              | n        |
|-------------------------------|---------------------------------------------------------------|-----------------------|--------------|--------|--------------|--------------|---------------|--------|---------------|--------------|----------|
|                               |                                                               |                       | DHJLT4       | JHDLT4 | DHJLT3       | JHDLT3       | DHJLT4        | JHDLT4 | DHJLT3        | JHDLT3       |          |
| Q98TX7;Q98TX6                 | Interferon regulatory factor 4                                | IRF-4                 | 0.172        | 3.794  | 0.158        | 14.800       | -2.536        | 1.924  | -2.660        | 3.888        | 4        |
| D0EL81                        | Glutathione reductase (Fragment)                              | GR                    | 0.260        |        | 0.154        | 8.186        | -1.943        |        | -2.700        | 3.033        | 3        |
| F1NQF4;E0A2T5;F1NC96;P14791;Q | Heme oxygenase 1 (Fragment)                                   | HMOX1;hmox1           | 0.342        | 3.752  | 0.139        | 4.578        | -1.546        | 1.908  | -2.843        | 2.195        | 4        |
| E1BYG9;E1BYG7;Q5ZM86          | Coiled-coil domain-containing protein 50                      | CCDC50                | 0.370        | 1.500  |              |              | -1.434        | 0.585  |               |              | 2        |
| P00337                        | L-lactate dehydrogenase B chain                               | LDHB                  | 0.435        | 1.171  | 3.339        | 0.161        | -1.202        | 0.228  | 1.739         | -2.638       | 4        |
| F1NFD7;Q9YGC1;Q9YGC1-2        | B-cell linker protein (Fragment)                              | BLNK                  | 0.463        | 1.910  | 0.303        | 5.029        | -1.111        | 0.933  | -1.723        | 2.330        | 4        |
| <b>Q5F356;F1NKL5;F1NKL4</b>   | <b>Phosphatidylinositol 5-phosphate 4-kinase type-2 alpha</b> | <b>PIP4K2A;PIP4K2</b> | <b>0.469</b> |        | <b>0.606</b> | <b>1.516</b> | <b>-1.091</b> |        | <b>-0.722</b> | <b>0.601</b> | <b>3</b> |
| E1C540                        | Uncharacterized protein                                       | NPM3                  | 0.496        | 1.945  |              |              | -1.011        | 0.960  |               |              | 2        |
| E1C0Q5                        | Uncharacterized protein                                       | ACAT1                 | 0.502        |        | 0.731        |              | -0.993        |        | -0.451        |              | 2        |
| F1P3F9                        | Glutamate dehydrogenase (Fragment)                            | GLUD1                 | 0.530        | 1.921  | 0.174        | 3.350        | -0.917        | 0.942  | -2.521        | 1.744        | 4        |
| F1P3B8;Q5F3U9;E1BT16          | Sister chromatid cohesion protein PDS5 homolog B              | PDS5B                 | 0.532        | 1.095  | 4.137        | 0.658        | -0.910        | 0.130  | 2.049         | -0.604       | 4        |
| F1NCW5;F1P3D9;Q5ZIF4;F1NWI3;F | Uncharacterized protein (Fragment)                            | SLC25A13;RCJM         | 0.554        |        |              | 0.827        | -0.851        |        |               | -0.274       | 2        |
| E1C3D2;E1BX15;Q5ZMH1          | Uncharacterized protein                                       | Sep-02;SEPT2          | 0.555        | 1.520  |              |              | -0.848        | 0.604  |               |              | 2        |

|                                 |                                                            |                |       |       |       |       |        |        |        |        |        |   |
|---------------------------------|------------------------------------------------------------|----------------|-------|-------|-------|-------|--------|--------|--------|--------|--------|---|
| F1NTT0;F1N9T0;P23228            | Hydroxymethylglutaryl-CoA synthase, cytoplasmic (Fragment) | HMGCS1         | 0.556 | 2.195 |       | 1.748 | -0.847 | 1.134  |        | 0.806  | 3      |   |
| F1NDY9;Q5ZK20                   | Uncharacterized protein                                    | PDIA4;RCJMB04  | 0.559 | 1.543 | 0.241 | 2.249 | -0.839 | 0.626  | -2.055 | 1.169  | 4      |   |
| Q98906                          | Microtubule-associated protein (Fragment)                  | MAP4           | 0.564 | 1.212 | 0.578 | 3.822 | -0.825 | 0.277  | -0.791 | 1.934  | 4      |   |
| P00368                          | Glutamate dehydrogenase 1, mitochondrial                   | GLUD1          | 0.565 | 1.936 | 0.211 | 3.286 | -0.824 | 0.953  | -2.242 | 1.716  | 4      |   |
| F1NCS6                          | Uncharacterized protein (Fragment)                         | MTHFD1L        | 0.565 | 2.240 | 2.042 | 1.285 | -0.822 | 1.164  | 1.030  | 0.362  | 4      |   |
| Q5ZM14;F1NK29                   | Na(+)/H(+) exchange regulatory cofactor NHE-RF1            | SLC9A3R1       | 0.570 | 1.301 | 0.193 | 3.261 | -0.810 | 0.379  | -2.371 | 1.705  | 4      |   |
| Q5F3D7                          | U3 small nucleolar RNA-associated protein 15 homolog       | UTP15          | 0.573 |       |       | 2.793 | -0.803 |        | 1.482  |        | 2      |   |
| F1NCR3;Q5ZIZ4                   | Cytolic purine 5-nucleotidase                              | NT5C2          | 0.585 | 1.881 |       |       | -0.774 | 0.911  |        |        | 2      |   |
| A7UEA8;F1P318;P28173            | Amidophosphoribyltransferase                               | GPAT;PPAT      | 0.588 | 1.323 |       |       | -0.766 | 0.404  |        |        | 2      |   |
| P21868                          | Casein kinase II subunit alpha                             | CSNK2A1        | 0.592 | 1.298 |       |       | -0.756 | 0.376  |        |        | 2      |   |
| Q5F3T3;F1NIP9;E1BVH4;F1NILO;F1N | Putative uncharacterized protein                           | RCJMB04_7k16;9 | 0.595 | 1.417 | 1.456 |       | -0.750 | 0.503  | 0.542  |        | 3      |   |
| E1BXT3;F1NUM3;Q5ZKZ1            | Uncharacterized protein                                    | GOSR2;RCJMB04  | 0.621 | 1.209 |       |       | -0.687 | 0.273  |        |        | 2      |   |
| F1NNS8                          | Uncharacterized protein (Fragment)                         | PRDX4          | 0.624 | 1.520 | 0.461 | 3.702 | -0.679 | 0.604  | -1.116 | 1.888  | 4      |   |
| F1P3F1                          | Adenylhomocysteinase (Fragment)                            | AHCY           | 0.627 | 1.631 | 3.903 | 0.504 | -0.674 | 0.706  | 1.965  | -0.988 | 4      |   |
| Q07460;G1K322                   | Eukaryotic translation initiation factor 5A-2              | EIF5A2         | 0.636 | 1.372 | 0.574 | 2.292 | -0.652 | 0.456  | -0.801 | 1.197  | 4      |   |
| Q5ZMH2;F1NFE2;F1NID2;Q5ZHK0;F   | Putative uncharacterized protein                           | RCJMB04_2a19   | 0.638 | 1.482 | 4.404 | 0.469 | -0.648 | 0.568  | 2.139  | -1.092 | 4      |   |
| F1NPF3                          | Uncharacterized protein (Fragment)                         | NDUFB9         | 0.655 | 1.475 |       |       | -0.611 | 0.561  |        |        | 2      |   |
| Q5ZMG9;F1P5K7                   | T-complex protein 1 subunit alpha                          | RCJMB04_2b5;T  | 0.664 |       |       | 3.446 | -0.591 |        | 1.785  |        | 2      |   |
| G1K330;P70082;F1NDT5;Q92064;F1  | Histone H2A (Fragment)                                     | H2A-IX         | 0.672 | 1.066 | 3.649 | 0.387 | -0.572 | 0.092  | 1.867  | -1.368 | 4      |   |
| Q5ZJ47;F1NWA8                   | Putative uncharacterized protein                           | RCJMB04_20m7   | 0.678 | 0.942 | 3.890 |       | -0.561 | -0.087 | 1.960  |        | 3      |   |
| F1NMC3;Q5ZI76                   | Uncharacterized protein                                    | MTHFD1;RCJMB   | 0.681 | 1.436 | 2.576 | 0.826 | -0.554 | 0.522  | 1.365  | -0.276 | 4      |   |
| Q5F4B2;F1N8E4                   | Switch-associated protein 70                               | SWAP70         | 0.695 | 1.395 |       | 0.673 | -0.526 | 0.480  |        | -0.572 | 3      |   |
| E1BSI5                          | Uncharacterized protein                                    | THOC2          | 0.698 | 0.790 | 3.177 | 0.502 | -0.519 | -0.340 | 1.668  | -0.994 | 4      |   |
| F1NBY8;Q5ZLG0;F1NFH5;Q5ZHT4;C   | Acetoacetyl-CoA synthetase                                 | AACS           | 0.701 | 0.935 | 0.491 | 1.202 | -0.513 | -0.096 | -1.027 | 0.265  | 4      |   |
| F1NPV3;Q9W719;F1NBZ6            | Hypoxanthine-guanine phphoribyltransferase (Fragment)      | HPRT1          | 0.703 | 1.848 |       |       | -0.508 | 0.886  |        |        | 2      |   |
| Q5ZJ54;F1NWH9                   | T-complex protein 1 subunit zeta                           | CCT6           | 0.710 | 1.127 |       | 0.705 | -0.494 | 0.172  |        | -0.504 | 3      |   |
| Q5ZIZ0                          | 6-phphogluconate dehydrogenase, decarboxylating            | PGD            | 0.715 | 1.400 | 0.234 | 0.891 | -0.484 | 0.485  | -2.096 | -0.166 | 4      |   |
| Q9W7P7;F1NJF0                   | P32 subunit of splicing factor SF2                         | SF2;C1QBP      | 0.716 | 1.365 | 0.785 | 1.400 | -0.482 | 0.449  | -0.349 | 0.485  | 4      |   |
| F1NLT9;F1NCL1;F1NDS3;P02263;Q9  | Histone H2A (Fragment)                                     | HIST2H2AC;H2A- | 0.721 | 1.092 |       | 0.465 | -0.471 | 0.128  |        | -1.106 | 3      |   |
| F1P304                          | Uncharacterized protein (Fragment)                         | ATP5O          | 0.729 | 1.030 |       |       | -0.457 | 0.043  |        |        | 2      |   |
| E1C6U8;F1NXR8;Q5ZIU4            | Uncharacterized protein                                    | LUC7L3;RCJMB0  | 0.734 |       |       | 3.297 | 0.403  | -0.447 |        | 1.721  | -1.311 | 3 |
| Q90997;F1NWR2;F1NTM6            | Transferrin receptor protein 1                             | TFRC           | 0.735 | 2.052 |       |       | -0.445 | 1.037  |        |        | 2      |   |
| F1P0L8;Q0KKP4;Q0KKP5            | Uncharacterized protein (Fragment)                         | CYP51A1;CYP51  | 0.741 | 2.133 | 1.697 | 0.695 | -0.432 | 1.093  | 0.763  | -0.525 | 4      |   |
| Q90593                          | 78 kDa gluce-regulated protein                             | HSPA5          | 0.743 | 1.256 | 0.672 | 2.723 | -0.429 | 0.329  | -0.573 | 1.445  | 4      |   |
| F1NY37;Q5ZM10                   | Acyl-coenzyme A oxidase                                    | ACOX1;RCJMB04  | 0.746 | 1.431 | 0.407 | 1.462 | -0.422 | 0.517  | -1.298 | 0.548  | 4      |   |
| Q5ZJB8;F1NTL1                   | Putative uncharacterized protein                           | RCJMB04_19g20  | 0.747 | 1.149 | 2.838 |       | -0.420 | 0.200  | 1.505  |        | 3      |   |
| F1P529;F1NZF7;Q5ZIS4            | Uncharacterized protein                                    | SF3B3          | 0.748 | 0.891 |       |       | -0.419 | -0.167 |        |        | 2      |   |
| Q5F3T2                          | Uncharacterized protein                                    | SEPT9          | 0.752 | 1.112 |       | 0.323 | -0.411 | 0.153  |        | -1.628 | 3      |   |
| P31335;Q5U784;Q5U785;Q5XKY5;E   | Bifunctional purine biynthesis protein PURH                | ATIC;PURH      | 0.755 | 2.932 | 0.276 |       | -0.405 | 1.552  | -1.860 |        | 3      |   |
| F1NWB7;P08110;B5AAV6;Q90WA6     | Endoplasmin                                                | HSP90B1        | 0.756 | 1.129 | 0.246 | 1.204 | -0.404 | 0.175  | -2.023 | 0.267  | 4      |   |

|                               |                                                                 |                  |       |       |       |       |        |              |               |               |   |
|-------------------------------|-----------------------------------------------------------------|------------------|-------|-------|-------|-------|--------|--------------|---------------|---------------|---|
| E1C4N0                        | Uncharacterized protein                                         | RPS10            | 0.759 | 1.130 | 1.595 | 0.548 | -0.399 | 0.177        | 0.674         | -0.869        | 4 |
| F1NUN1                        | Microtubule-associated protein (Fragment)                       | MAP              | 0.765 | 0.924 |       |       | -0.387 | -0.115       |               |               | 2 |
| D2Z1L9;F1NJF3                 | LIM and SH3 protein 1                                           | LASP1            | 0.775 | 0.977 |       |       | -0.368 | -0.034       |               |               | 2 |
| E1C8W4                        | Ubiquitin carboxyl-terminal hydrolase                           | USP5             | 0.776 | 0.746 | 0.364 | 0.603 | -0.366 | -0.422       | <b>-1.460</b> | -0.730        | 4 |
| F1NBW0                        | Uncharacterized protein (Fragment)                              | MTPAP            | 0.778 | 1.162 | 4.106 |       | -0.363 | 0.216        | <b>2.038</b>  |               | 3 |
| F1NB38                        | Ethylmalonyl-CoA decarboxylase                                  | ECHDC1           | 0.779 | 1.433 |       | 1.406 | -0.360 | 0.519        |               | 0.492         | 3 |
| E1BUW6                        | Microtubule-associated protein                                  | MAP4             | 0.791 | 1.226 | 0.329 | 2.999 | -0.338 | 0.294        | <b>-1.604</b> | <b>1.584</b>  | 4 |
| Q5ZKA5                        | Bifunctional methylenetetrahydrofolate dehydrogenase/cyclohydro | MTHFD2           | 0.795 | 1.052 | 0.741 | 1.262 | -0.330 | 0.073        | -0.433        | 0.336         | 4 |
| E1BUP6                        | Uncharacterized protein                                         | PDIA5            | 0.797 | 1.039 | 0.389 | 1.352 | -0.327 | 0.055        | <b>-1.363</b> | 0.435         | 4 |
| F1NHI9;Q5ZHU4;Q90YA3          | 6-phphofructokinase (Fragment)                                  | PFKP             | 0.801 | 1.183 | 2.315 |       | -0.319 | 0.242        | <b>1.211</b>  |               | 3 |
| E1BT94                        | Uncharacterized protein                                         | NDUFB6           | 0.803 | 1.202 |       |       | -0.316 | 0.265        |               |               | 2 |
| F1NPG8;Q9I8D6;Q5ZMG3          | T-complex protein 1 subunit delta (Fragment)                    | CCT4;tcp-1 delta | 0.804 | 0.780 | 3.221 | 0.878 | -0.316 | -0.359       | <b>1.687</b>  | -0.187        | 4 |
| Q5ZKB9;E1C8R1                 | Probable ATP-dependent RNA helicase DDX6                        | DDX6             | 0.806 | 1.008 | 3.016 | 0.228 | -0.311 | 0.011        | <b>1.593</b>  | <b>-2.136</b> | 4 |
| F1NSC1                        | Uncharacterized protein (Fragment)                              | ATP5F1           | 0.811 | 0.926 |       |       | -0.303 | -0.111       |               |               | 2 |
| DOVX26                        | Mitochondrial cytochrome c1, heme protein                       | MCC1             | 0.812 | 0.804 | 0.569 | 1.274 | -0.300 | -0.315       | <b>-0.813</b> | 0.349         | 4 |
| F1NPF0;Q5ZMS3                 | Eukaryotic translation initiation factor 2 subunit 3            | EIF2S3           | 0.815 | 1.206 | 3.371 | 0.192 | -0.295 | 0.270        | <b>1.753</b>  | <b>-2.378</b> | 4 |
| F1NY29;Q5F3D8                 | Uncharacterized protein                                         | ETFDH;RCJMB04    | 0.817 |       | 2.168 |       | -0.292 |              | <b>1.116</b>  |               | 2 |
| F1NGU3;Q5ZIN9;F1NX33          | Uncharacterized protein (Fragment)                              | LRPPRC           | 0.821 | 1.167 | 1.227 | 0.969 | -0.284 | 0.223        | 0.295         | -0.046        | 4 |
| E1BS67                        | Serine hydroxymethyltransferase                                 | SHMT1            | 0.825 | 0.980 | 1.955 | 1.552 | -0.277 | -0.029       | 0.967         | 0.634         | 4 |
| F1NGP4                        | Uncharacterized protein (Fragment)                              | DUS3L            | 0.831 | 1.037 |       | 0.274 | -0.267 | 0.053        |               | <b>-1.869</b> | 3 |
| F1NY54;F1NEE5;Q5ZMK4          | Uncharacterized protein                                         | THRAP3;RCJMB0    | 0.832 | 0.986 | 3.471 | 1.898 | -0.265 | -0.021       | <b>1.795</b>  | <b>0.924</b>  | 4 |
| P47836;F1NFC6;F1POF2          | 40S ribomal protein S4                                          | RPS4             | 0.836 | 1.034 | 1.609 | 0.362 | -0.258 | 0.048        | 0.686         | -1.468        | 4 |
| P00508;F1P180                 | <b>Aspartate aminotransferase, mitochondrial</b>                | GOT2             | 0.845 | 1.731 | 0.836 | 1.190 | -0.244 | <b>0.791</b> | -0.258        | 0.251         | 4 |
| F1NH93                        | Uncharacterized protein (Fragment)                              | RPS20            | 0.849 | 1.328 |       |       | -0.236 | 0.409        |               |               | 2 |
| E1BZ79                        | Uncharacterized protein                                         | MVK              | 0.849 | 1.017 |       |       | -0.236 | 0.024        |               |               | 2 |
| F1NEI4;F1NA45;Q90706          | Uncharacterized protein                                         | C5H14orf166;CL   | 0.851 |       | 3.107 |       | -0.233 |              | <b>1.636</b>  |               | 2 |
| F1NBI2                        | Uroporphyrinogen decarboxylase (Fragment)                       | UROD             | 0.851 | 1.197 | 1.914 | 1.181 | -0.232 | 0.260        | 0.937         | 0.240         | 4 |
| E1C3T6                        | Uncharacterized protein                                         | ECI1             | 0.852 | 1.115 | 0.404 | 2.313 | -0.231 | 0.157        | <b>-1.308</b> | <b>1.210</b>  | 4 |
| F1NKN0;Q5F411                 | Uncharacterized protein (Fragment)                              | CCT5             | 0.853 | 0.687 | 4.634 | 0.587 | -0.229 | -0.541       | <b>2.212</b>  | -0.769        | 4 |
| P02272;Q5ZMD6;F2Z4M5;E1C4W6   | Histone H2A.V                                                   | H2AFV;H2AFZ      | 0.855 | 0.688 |       | 0.482 | -0.226 | -0.540       |               | -1.054        | 3 |
| Q90705                        | Elongation factor 2                                             | EEF2             | 0.856 | 1.094 | 0.152 | 2.083 | -0.225 | 0.130        | <b>-2.715</b> | <b>1.059</b>  | 4 |
| E1BU15;F1NRN7;Q5F4C4          | Leucine-rich repeat protein SHOC-2                              | SHOC2            | 0.857 | 0.630 |       |       | -0.223 | -0.667       |               |               | 2 |
| Q09121                        | <b>Eukaryotic translation initiation factor 5A-1</b>            | EIF5A1           | 0.858 | 1.158 | 0.577 | 2.031 | -0.221 | 0.212        | <b>-0.793</b> | <b>1.022</b>  | 4 |
| F1P4F4;Q5ZM63                 | Uncharacterized protein                                         | SSR1;RCJMB04_2   | 0.859 |       | 2.610 | 1.081 | -0.220 |              | <b>1.384</b>  | 0.112         | 3 |
| F1NS60                        | Uncharacterized protein (Fragment)                              | MMS19            | 0.862 | 1.044 | 2.275 | 0.730 | -0.215 | 0.063        | <b>1.186</b>  | -0.454        | 4 |
| F1NGB1;Q5ZHR1;F1NCP9          | Uncharacterized protein                                         | NUCB2;RCJMB04    | 0.862 | 1.325 | 0.308 | 3.064 | -0.215 | 0.405        | <b>-1.698</b> | <b>1.615</b>  | 4 |
| F1NC26;Q5F3J8                 | Uncharacterized protein                                         | HSPA4L;RCJMB0    | 0.865 | 1.010 | 0.517 | 0.633 | -0.209 | 0.014        | <b>-0.952</b> | -0.661        | 4 |
| F1NW84;F1NVA4;P16039;Q6LEK3;F | Nucleophmin (Fragment)                                          | NPM1             | 0.868 | 1.001 | 0.810 |       | -0.204 | 0.001        | -0.305        |               | 3 |
| E1BX03;F1NGC0;Q5ZM76;F1NYJ3   | Uncharacterized protein                                         | FUBP1            | 0.868 | 1.041 |       | 3.135 | -0.204 | 0.058        |               | <b>1.649</b>  | 3 |
| F1NCC9;Q5ZLP0                 | Uncharacterized protein                                         | SMARCE1;RCJMB    | 0.872 | 1.087 | 0.873 | 0.718 | -0.198 | 0.121        | -0.195        | -0.479        | 4 |

|                                |                                                                        |                 |       |       |       |       |  |        |        |        |  |        |   |
|--------------------------------|------------------------------------------------------------------------|-----------------|-------|-------|-------|-------|--|--------|--------|--------|--|--------|---|
| E1BV85                         | Uncharacterized protein                                                | LRR20           | 0.873 | 0.704 |       |       |  | -0.196 | -0.507 |        |  |        | 2 |
| F1NBU1                         | Uncharacterized protein (Fragment)                                     | RPS16           | 0.874 | 1.278 |       |       |  | -0.195 | 0.354  |        |  |        | 2 |
| E1BX21                         | Uncharacterized protein                                                | SIN3A           | 0.880 | 1.197 | 4.561 |       |  | -0.184 | 0.260  | 2.189  |  |        | 3 |
| G1K331;G1K329;P84229;C6ZL36;Q  | Histone H3 (Fragment)                                                  | LOC417953;H3-I  | 0.883 | 0.871 |       | 0.328 |  | -0.179 | -0.199 |        |  | -1.607 | 3 |
| P50890;Q6SVA6;F1NKH1           | 40S ribosomal protein SA                                               | RPSA            | 0.885 | 1.044 | 1.328 | 0.961 |  | -0.177 | 0.063  | 0.410  |  | -0.058 | 4 |
| E1QB6;F1NC38;Q5ZJ93            | Uncharacterized protein                                                | ACADL;RCJMB04   | 0.885 | 0.896 |       | 0.119 |  | -0.177 | -0.158 |        |  | -3.071 | 3 |
| E1BR10                         | Uncharacterized protein                                                | PRDX3           | 0.890 | 0.805 | 0.664 | 1.493 |  | -0.168 | -0.313 | -0.591 |  | 0.578  | 4 |
| B0LVF9;B0LVG0;Q9PRV4           | Microtubule-associated protein                                         | MAPT            | 0.893 | 1.029 | 0.374 |       |  | -0.163 | 0.041  | -1.419 |  |        | 3 |
| Q5ZKM2;Q90835;F1N9H4;Q6PTX1    | Elongation factor 1-alpha                                              | RCJMB04_10b5;   | 0.901 | 1.068 | 0.500 | 1.501 |  | -0.151 | 0.095  | -1.000 |  | 0.586  | 4 |
| G1K332;F1NCK6;P62801;P70081;Q  | Histone H4 (Fragment)                                                  | H4;H4-I;H4-VIII | 0.903 | 0.817 | 3.305 | 0.259 |  | -0.147 | -0.291 | 1.724  |  | -1.949 | 4 |
| F1P2T7;O93378;B9VVJ4;Q9PWP7;Q  | Uncharacterized protein (Fragment)                                     | STAT5B;Stat5    | 0.903 | 1.350 |       | 0.600 |  | -0.147 | 0.433  |        |  | -0.737 | 3 |
| F1P4H4;Q5ZIM7                  | Uncharacterized protein                                                | TXNDC5;RCJMB0   | 0.904 | 1.858 | 0.085 | 5.081 |  | -0.146 | 0.893  | -3.558 |  | 2.345  | 4 |
| Q5ZLN9;F1ND94                  | Uncharacterized protein                                                | RRAGC;RRAGD     | 0.905 | 1.196 | 3.936 |       |  | -0.144 | 0.259  | 1.977  |  |        | 3 |
| E1BTR4                         | Uncharacterized protein                                                | SPINK4          | 0.905 |       | 3.869 |       |  | -0.143 |        | 1.952  |  |        | 2 |
| E1C8P2                         | Uncharacterized protein                                                | PAPSS1          | 0.906 |       | 2.467 | 0.347 |  | -0.143 |        | 1.303  |  | -1.526 | 3 |
| P00548                         | Pyruvate kinase muscle isozyme                                         | PKM2            | 0.907 | 1.089 | 3.027 | 0.646 |  | -0.141 | 0.123  | 1.598  |  | -0.631 | 4 |
| Q9IAY5                         | Protein syndesm                                                        | SDOS            | 0.915 |       | 1.262 |       |  | -0.128 |        | 0.336  |  |        | 2 |
| P18359                         | Dextrin                                                                | DSTN            | 0.917 | 0.839 | 0.398 |       |  | -0.125 | -0.254 | -1.328 |  |        | 3 |
| F1N964                         | Uncharacterized protein (Fragment)                                     | GSR             | 0.920 |       | 0.169 | 7.388 |  | -0.120 |        | -2.562 |  | 2.885  | 3 |
| P00356;F1NH87                  | Glyceraldehyde-3-phosphate dehydrogenase                               | GAPDH           | 0.922 | 0.897 | 1.376 |       |  | -0.118 | -0.156 | 0.460  |  |        | 3 |
| E1BSQ4;E1BSQ3;E1C8Y4;E1C8Z0;F1 | Dolichyl-diphosphooligaccharide--protein glycosyltransferase subunit 2 | RPN2;RCJMB04    | 0.926 | 1.045 |       |       |  | -0.111 | 0.064  |        |  |        | 2 |
| F1N887                         | Uncharacterized protein (Fragment)                                     | KIAA0391        | 0.927 | 0.927 | 5.864 | 0.306 |  | -0.110 | -0.110 | 2.552  |  | -1.708 | 4 |
| E1C6N0                         | Uncharacterized protein                                                | PSMD14          | 0.929 | 1.116 |       |       |  | -0.106 | 0.159  |        |  |        | 2 |
| Q8AWB4;Q5ZLZ9;F1NV29           | Putative uncharacterized protein POFUT1                                | POFUT1;RCJMB0   | 0.930 | 0.714 | 4.585 | 0.166 |  | -0.105 | -0.486 | 2.197  |  | -2.592 | 4 |
| F1NHF1                         | Uncharacterized protein (Fragment)                                     | ATP5J2          | 0.931 | 0.931 |       |       |  | -0.103 | -0.103 |        |  |        | 2 |
| F1NX56;F1P4M6;Q5ZKF0           | Uncharacterized protein                                                | OGT             | 0.932 | 0.895 | 2.222 | 0.483 |  | -0.102 | -0.160 | 1.152  |  | -1.051 | 4 |
| P0C7A1;F1NLP8                  | Cytolic endo-beta-N-acetylglucaminidase                                | ENGASE          | 0.934 |       | 0.463 | 2.253 |  | -0.099 |        | -1.112 |  | 1.172  | 3 |
| E1C525                         | Uncharacterized protein                                                | EXOSC10         | 0.939 |       | 4.505 | 0.335 |  | -0.092 |        | 2.172  |  | -1.577 | 3 |
| Q5ZKC9;F1NPX9;Q9PS14           | 14-3-3 protein zeta                                                    | YWHAZ           | 0.939 | 0.852 |       |       |  | -0.091 | -0.231 |        |  |        | 2 |
| F1P2C8;F1P399;Q5ZKA2           | Isoleucine--tRNA ligase, mitochondrial (Fragment)                      | IARS2           | 0.942 | 1.487 | 1.921 | 0.487 |  | -0.087 | 0.572  | 0.942  |  | -1.037 | 4 |
| Q5ZIA5                         | Coatomer subunit beta                                                  | COPB1           | 0.942 | 0.992 | 0.923 | 0.579 |  | -0.086 | -0.012 | -0.115 |  | -0.790 | 4 |
| E1BUD8                         | Uncharacterized protein                                                | SEC24C          | 0.946 | 1.133 |       |       |  | -0.081 | 0.181  |        |  |        | 2 |
| F1NW43;F1P4U1                  | Pyruvate kinase (Fragment)                                             | PKM2            | 0.947 | 1.095 | 2.987 | 0.597 |  | -0.078 | 0.131  | 1.579  |  | -0.745 | 4 |
| Q9PTR5                         | Lissencephaly-1 homolog                                                | PAFAH1B1        | 0.948 |       | 3.974 |       |  | -0.077 |        | 1.991  |  |        | 2 |
| Q5ZJK1;F1NCM4;F1NEI6;Q5ZIA6    | THO complex subunit 5 homolog                                          | THOC5;RCJMB04   | 0.953 | 1.313 |       | 0.314 |  | -0.070 | 0.393  |        |  | -1.670 | 3 |
| F1NG30                         | Uncharacterized protein                                                | NAA25           | 0.956 | 0.939 |       |       |  | -0.064 | -0.090 |        |  |        | 2 |
| DOEKR3                         | Peptidyl-prolyl cis-trans isomerase                                    | PPCTI           | 0.957 | 1.330 | 0.190 | 3.249 |  | -0.063 | 0.411  | -2.394 |  | 1.700  | 4 |
| F1NDB3;P21265;Q683M9;E1BR00;C  | Adenylyuccinate lyase                                                  | ADSL            | 0.957 | 0.840 |       |       |  | -0.063 | -0.251 |        |  |        | 2 |
| F1NSZ4                         | Uncharacterized protein (Fragment)                                     | NPEPL1          | 0.958 | 1.345 | 0.864 | 2.804 |  | -0.062 | 0.427  | -0.210 |  | 1.488  | 4 |
| Q5ZI56;E1C3K3;F1NYL7           | Putative uncharacterized protein                                       | RCJMB04_30d2;   | 0.959 | 1.504 |       |       |  | -0.060 | 0.588  |        |  |        | 2 |

|                                 |                                                                     |               |       |       |       |       |        |        |               |               |   |
|---------------------------------|---------------------------------------------------------------------|---------------|-------|-------|-------|-------|--------|--------|---------------|---------------|---|
| F1NQZ9                          | Uncharacterized protein (Fragment)                                  | GCLC          | 0.962 |       | 0.624 |       | -0.055 |        | <b>-0.680</b> |               | 2 |
| F1NT20;E1BV95;Q5ZHQ4            |                                                                     | ACAT2         | 0.964 | 1.217 |       | 1.174 | -0.052 | 0.283  |               | 0.231         | 3 |
| P05094;P05094-2;P20111-2;P20111 | Alpha-actinin-1                                                     | ACTN1         | 0.965 | 0.505 |       | 0.133 | -0.051 | -0.986 |               | <b>-2.909</b> | 3 |
| F1NX13;Q5H7M6                   | Uncharacterized protein                                             | DRG1;drg1     | 0.966 | 0.980 | 1.760 | 0.751 | -0.049 | -0.028 | 0.816         | -0.413        | 4 |
| Q5ZJK8;F1NK38;F1NZN1            | T-complex protein 1 subunit eta                                     | CCT7          | 0.968 | 0.855 | 2.681 | 1.837 | -0.047 | -0.225 | 1.423         | 0.877         | 4 |
| Q6EE31;F1P1N9;F1NEF2            | T-complex protein 1 subunit theta                                   | CCT8          | 0.973 | 0.741 |       | 1.040 | -0.040 | -0.432 |               | 0.056         | 3 |
| Q5ZHN0;F1NLB6;E1C059            | Putative uncharacterized protein                                    | RCJMB04_35e5; | 0.973 | 1.306 |       |       | -0.039 | 0.385  |               |               | 2 |
| F1NK96;F1N966;Q5F472            | Uncharacterized protein                                             | PDIA6         | 0.976 | 1.056 | 0.260 | 1.872 | -0.035 | 0.078  | <b>-1.941</b> | <b>0.905</b>  | 4 |
| E1BY12;E1BXC1;F1NCI1;F1NCR9     | Uncharacterized protein                                             | AP2B1;AP1B1   | 0.977 | 1.063 |       | 1.396 | -0.034 | 0.088  |               | 0.481         | 3 |
| Q90734                          | Alpha-actinin-4                                                     | ACTN4         | 0.983 | 0.744 | 5.163 | 0.120 | -0.024 | -0.426 | <b>2.368</b>  | <b>-3.064</b> | 4 |
| F1NEG6;F1NJJ5;Q6WNG8;F1NJJ4;Q   | Uncharacterized protein                                             | HNRNPH1;RCJM  | 0.988 | 0.736 |       | 0.731 | -0.018 | -0.443 |               | -0.452        | 3 |
| Q5ZLD5;F1NUL8;F1P4N6            | Putative uncharacterized protein                                    | RCJMB04_6k8;W | 0.988 | 1.135 |       |       | -0.018 | 0.183  |               |               | 2 |
| Q8JFP1;F1NTS2;Q5ZM36;E1BSE5     | Eukaryotic initiation factor 4A-II                                  | EIF4A2        | 0.989 | 1.239 |       | 0.702 | -0.016 | 0.310  |               | -0.510        | 3 |
| F1N8K4;Q5ZMS2                   | Platelet-activating factor acetylhydrolase IB subunit beta          | PAFAH1B2      | 0.992 | 0.971 | 0.477 | 1.446 | -0.011 | -0.043 | <b>-1.068</b> | 0.532         | 4 |
| G1K326;POCB50                   | Peroxiredoxin-1 (Fragment)                                          | PRDX1         | 0.994 | 0.812 | 1.278 |       | -0.008 | -0.300 | 0.354         |               | 3 |
| P47826;F1NB66                   | 60S acidic ribomal protein P0                                       | RPLP0         | 0.995 | 1.257 | 2.427 | 0.650 | -0.007 | 0.330  | 1.279         | -0.620        | 4 |
| F1NNP8                          | Uncharacterized protein (Fragment)                                  | TSR1          | 0.996 | 1.030 | 0.578 | 0.606 | -0.005 | 0.043  | <b>-0.792</b> | -0.724        | 4 |
| E1BV44                          | Uncharacterized protein                                             | CSE1L         | 0.999 | 0.936 | 0.254 | 0.821 | -0.002 | -0.096 | <b>-1.979</b> | -0.285        | 4 |
| G8JL27;P63247                   | Guanine nucleotide-binding protein subunit beta-2-like 1 (Fragment) | GNB2L1        | 1.003 | 0.990 | 4.166 | 0.560 | 0.004  | -0.014 | 2.059         | -0.837        | 4 |
| F1NRW7;F1NWP3;O73885;B3VHV2     | Heat shock cognate 71 kDa protein (Fragment)                        | HSPA8         | 1.004 | 1.151 | 1.201 | 1.913 | 0.005  | 0.203  | 0.264         | <b>0.936</b>  | 4 |
| E1BVP1;E1C8K7                   | Uncharacterized protein                                             | EIF5B         | 1.004 | 0.775 | 4.431 |       | 0.005  | -0.367 | 2.148         |               | 3 |
| P11501;F1NVN4;Q5ZKZ3;Q2XQE5;F   | Heat shock protein HSP 90-alpha                                     | HSP90AA1      | 1.005 | 1.143 |       |       | 0.008  | 0.193  |               |               | 2 |
| F1N9X5;Q5ZJC1;F1NPA9;Q6EE58     | Uncharacterized protein                                             | RPS3;RCJMB04_ | 1.006 | 1.272 | 2.091 | 0.720 | 0.009  | 0.347  | 1.064         | -0.473        | 4 |
| Q5ZLC5                          | ATP synthase subunit beta, mitochondrial                            | ATP5B         | 1.008 | 0.943 | 0.478 | 0.637 | 0.011  | -0.085 | <b>-1.065</b> | -0.650        | 4 |
| Q6EE30                          | Eukaryotic translation elongation factor 1                          | eTEF1         | 1.011 | 0.871 | 1.105 | 0.915 | 0.015  | -0.199 | 0.144         | -0.128        | 4 |
| Q8JG64                          | Protein disulfide-isomerase A3                                      | PDIA3         | 1.014 | 1.196 | 0.326 | 0.964 | 0.019  | 0.258  | <b>-1.617</b> | -0.053        | 4 |
| Q5ZJQ5;Q5ZJQ6                   | Putative uncharacterized protein                                    | RCJMB04_16g5; | 1.019 |       | 4.056 | 0.693 | 0.027  |        | <b>2.020</b>  | -0.529        | 3 |
| F1NU17;P51903                   | Phphoglycerate kinase                                               | PGK1;PGK      | 1.019 | 0.946 | 0.461 | 1.567 | 0.028  | -0.080 | <b>-1.119</b> | 0.648         | 4 |
| F1N941;E1C0S2;Q5ZK88            | Paraspeckle component 1                                             | PSPC1         | 1.022 | 0.728 | 1.686 | 0.794 | 0.031  | -0.459 | 0.754         | -0.333        | 4 |
| F1P1A8                          | Uncharacterized protein (Fragment)                                  | SMARCC1       | 1.024 | 1.232 | 0.698 | 1.220 | 0.034  | 0.301  | -0.518        | 0.287         | 4 |
| Q5ZKN9                          | Putative uncharacterized protein                                    | RCJMB04_9n20  | 1.031 | 0.898 |       |       | 0.044  | -0.155 |               |               | 2 |
| Q5ZMC1;Q5ZMA1                   | Uncharacterized protein                                             | DDX19B        | 1.035 | 1.177 | 2.276 |       | 0.050  | 0.235  | 1.187         |               | 3 |
| A3R064                          | Docking protein 3                                                   | DOK3          | 1.039 |       | 2.201 |       | 0.055  |        | 1.138         |               | 2 |
| E1C266                          | Uncharacterized protein                                             | YARS2         | 1.043 |       | 4.327 |       | 0.061  |        | <b>2.113</b>  |               | 2 |
| Q5ZL72                          | 60 kDa heat shock protein, mitochondrial                            | HSPD1         | 1.044 | 0.866 |       | 0.859 | 0.062  | -0.208 |               | -0.219        | 3 |
| F1NIP5;E1BRQ0;Q5ZI49            | Ribe-phphate pyrophosphokinase (Fragment)                           | PRPS1         | 1.047 | 0.742 |       | 0.853 | 0.067  | -0.431 |               | -0.230        | 3 |
| Q90WD0;F1NW48                   | Actin-related protein 3                                             | ACTR3;ACTR3B  | 1.048 | 1.049 |       |       | 0.068  | 0.069  |               |               | 2 |
| F1P555;Q91017                   | Uncharacterized protein                                             | SFPQ          | 1.050 | 0.623 | 2.377 | 0.398 | 0.070  | -0.682 | 1.249         | -1.329        | 4 |
| Q5F424                          | Uncharacterized protein                                             | CCT2          | 1.050 | 1.087 | 2.613 | 0.546 | 0.070  | 0.121  | 1.385         | -0.872        | 4 |
| Q90XD9                          | Transcriptional coactivator p100 (Fragment)                         |               | 1.061 | 0.984 | 1.796 | 0.652 | 0.085  | -0.024 | 0.845         | -0.617        | 4 |

|                                |                                                                          |                |       |       |       |       |       |              |               |               |   |
|--------------------------------|--------------------------------------------------------------------------|----------------|-------|-------|-------|-------|-------|--------------|---------------|---------------|---|
| Q5F3L2;F1NYE5;F1NDI3           | Putative uncharacterized protein                                         | RCJMB04_14f6;S | 1.063 | 1.172 | 0.672 | 0.877 | 0.089 | 0.229        | <b>-0.574</b> | -0.189        | 4 |
| F1P582;D0VX29                  | Uncharacterized protein                                                  | UQCRC2         | 1.066 | 0.766 | 2.312 | 0.639 | 0.092 | -0.384       | 1.209         | -0.646        | 4 |
| F1NIQ3;Q5F3V3                  | Sister chromatid cohesion protein PDS5 homolog A                         | PDS5A          | 1.069 | 1.112 | 0.955 | 0.619 | 0.096 | 0.153        | -0.067        | -0.692        | 4 |
| F1NGA2;F1NI22;Q8UVX3;Q9DDH7;   | ATP synthase subunit alpha (Fragment)                                    | ATP5A1         | 1.074 | 0.912 | 0.551 | 0.571 | 0.103 | -0.133       | <b>-0.860</b> | -0.810        | 4 |
| Q5ZLF2;Q8JH64                  | Tyrosine-protein kinase BTK                                              | BTK            | 1.074 | 0.844 | 5.331 |       | 0.103 | -0.245       | 2.414         |               | 3 |
| E1C6E1                         | Uncharacterized protein                                                  | PLCG2          | 1.076 | 0.832 | 8.140 |       | 0.105 | -0.266       | 3.025         |               | 3 |
| F1NJX8                         | Uncharacterized protein (Fragment)                                       | FNTA           | 1.080 | 1.036 | 2.516 | 1.140 | 0.111 | 0.051        | 1.331         | 0.189         | 4 |
| F1P2L1;Q5ZMF5;E1C2S5;E1C8M9    | Uncharacterized protein                                                  | CANX;RCJMB04   | 1.081 | 0.772 | 0.532 | 1.769 | 0.112 | -0.374       | <b>-0.911</b> | 0.823         | 4 |
| Q98UJ8                         | Branched-chain alpha-keto acid dehydrogenase E1-alpha subunit (Fragment) |                | 1.081 |       | 2.673 |       | 0.112 |              | 1.419         |               | 2 |
| F1NRD9;F1NV49;Q90WU3           | ATP-dependent RNA helicase DDX1 (Fragment)                               | DDX1           | 1.082 | 0.742 | 2.220 |       | 0.113 | -0.430       | 1.150         |               | 3 |
| Q5ZI29;F1NFD9;F1NJ97           | Putative uncharacterized protein                                         | RCJMB04_31a13  | 1.096 | 0.762 | 0.994 | 0.856 | 0.132 | -0.392       | -0.009        | -0.225        | 4 |
| Q5ZLW7;F1NK51                  | Putative uncharacterized protein                                         | RCJMB04_4j8;LU | 1.106 | 1.121 | 1.954 |       | 0.146 | 0.165        | 0.966         |               | 3 |
| E1C7D4;Q5ZIZ6;E1C7L0           | Uncharacterized protein                                                  | CTBP1          | 1.108 | 0.843 | 1.339 | 0.676 | 0.147 | -0.246       | 0.421         | -0.565        | 4 |
| Q5F3D2                         | Uncharacterized protein                                                  | HNRNPH3        | 1.109 | 0.768 | 1.589 | 0.881 | 0.149 | -0.381       | 0.668         | -0.183        | 4 |
| F1NJL0                         | Uncharacterized protein (Fragment)                                       | ATXN2          | 1.114 | 0.907 | 2.752 | 0.679 | 0.155 | -0.141       | 1.461         | -0.559        | 4 |
| F1NM59;E1BQE4;E1BQE3;E1BQE2    | Uncharacterized protein (Fragment)                                       | RBM27          | 1.121 | 0.931 |       |       | 0.165 | -0.103       |               |               | 2 |
| F1P2P4                         | Uncharacterized protein (Fragment)                                       | CARKD          | 1.122 | 1.081 | 1.103 | 1.157 | 0.166 | 0.113        | 0.142         | 0.210         | 4 |
| P09531                         | Transforming growth factor beta-1 (Fragment)                             | TGFB1          | 1.128 | 1.538 |       | 2.400 | 0.173 | <b>0.621</b> |               | <b>1.263</b>  | 3 |
| Q57660;F1NI29                  | CFR-associated protein p70                                               | HADHA          | 1.128 | 1.044 |       |       | 0.174 | 0.062        |               |               | 2 |
| P84175                         | 40S ribomal protein S12                                                  | RPS12          | 1.129 | 1.493 |       |       | 0.175 | <b>0.578</b> |               |               | 2 |
| Q5ZJQ2                         | Phenylalanine--tRNA ligase alpha subunit                                 | FARSA          | 1.134 | 2.023 | 4.184 |       | 0.181 | <b>1.016</b> | 2.065         |               | 3 |
| F1NU36;F1NDD6;O57378           | Uncharacterized protein (Fragment)                                       | LRPAP1;rap     | 1.137 | 1.152 |       | 1.861 | 0.185 | 0.204        |               | <b>0.896</b>  | 3 |
| F1N9I5;Q9PW24                  | Uncharacterized protein                                                  | ELAVL1;HuA     | 1.141 | 0.673 | 2.993 |       | 0.190 | -0.571       | 1.582         |               | 3 |
| F1P0Y4;F1P0Y5;Q5F447;F1NW30    | Uncharacterized protein                                                  | SFRS15;RCJMB04 | 1.147 | 0.975 | 2.308 | 0.661 | 0.198 | -0.036       | 1.206         | -0.597        | 4 |
| F1NBL6                         | Uncharacterized protein (Fragment)                                       | XPO5           | 1.156 | 0.826 | 0.427 | 0.682 | 0.209 | -0.275       | <b>-1.227</b> | -0.552        | 4 |
| Q5ZIZ5                         | Uncharacterized protein                                                  | NONO           | 1.157 | 0.725 | 4.094 | 0.306 | 0.211 | -0.463       | 2.033         | -1.707        | 4 |
| F1NVF0;Q5ZL51                  | Uncharacterized protein                                                  | VPS35;RCJMB04  | 1.158 | 0.943 | 0.573 | 0.989 | 0.211 | -0.084       | <b>-0.804</b> | -0.016        | 4 |
| Q5ZJ61                         | Uncharacterized protein                                                  | FARSB          | 1.160 | 0.792 | 3.939 | 0.434 | 0.214 | -0.336       | 1.978         | -1.205        | 4 |
| Q5ZM62;F1NIH9;F1NII0;F1NHT0;Q5 | Putative uncharacterized protein                                         | RCJMB04_2p22;  | 1.160 | 0.843 | 4.012 |       | 0.214 | -0.247       | 2.004         |               | 3 |
| F1NP63                         | Uncharacterized protein (Fragment)                                       | KPNB1          | 1.163 | 0.809 | 1.783 | 0.826 | 0.218 | -0.306       | 0.834         | -0.276        | 4 |
| Q5ZH20                         | Spliceome RNA helicase DDX39B                                            | DDX39B         | 1.180 | 0.710 | 0.533 | 0.717 | 0.239 | -0.494       | <b>-0.908</b> | -0.480        | 4 |
| E1C7K8                         | Uncharacterized protein                                                  | NDUFAF4        | 1.181 | 0.842 |       | 0.765 | 0.240 | -0.247       |               | -0.386        | 3 |
| Q98TY6;F1NXW5;F1NL77           | Tyrosine kinase negative regulator Cbl                                   | CBL;CBLB       | 1.184 | 0.731 |       |       | 0.244 | -0.452       |               |               | 2 |
| E1C4M0                         | Uncharacterized protein                                                  | RPS2           | 1.197 |       | 1.584 | 0.386 | 0.259 |              | 0.663         | -1.373        | 3 |
| Q5ZIV6;F1NSV7;F1NHF5;F1NHM6    | Putative uncharacterized protein                                         | RCJMB04_23e15  | 1.214 | 0.886 | 1.276 | 0.716 | 0.280 | -0.174       | 0.352         | -0.482        | 4 |
| Q98SE2;Q98TR0                  | U2snRNP auxiliary factor small subunit                                   | U2AF1          | 1.216 | 1.382 |       |       | 0.282 | 0.466        |               |               | 2 |
| E1BSL7                         | Uncharacterized protein                                                  | ERP44          | 1.217 | 0.767 | 0.711 | 1.896 | 0.283 | -0.383       | -0.492        | <b>0.923</b>  | 4 |
| E1C2C3                         | Uncharacterized protein                                                  | SF3B1          | 1.226 | 0.687 | 4.310 | 0.720 | 0.293 | -0.541       | 2.108         | -0.474        | 4 |
| F1P1A5                         | Uncharacterized protein (Fragment)                                       | TKT            | 1.233 | 0.566 | 2.740 | 0.153 | 0.302 | -0.822       | 1.454         | <b>-2.708</b> | 4 |
| Q5ZLC7                         | Microtubule-associated protein RP/EB family member 1                     | MAPRE1         | 1.234 | 1.057 |       |       | 0.303 | 0.080        |               |               | 2 |

|                                |                                                               |                |       |       |       |       |       |        |        |        |   |
|--------------------------------|---------------------------------------------------------------|----------------|-------|-------|-------|-------|-------|--------|--------|--------|---|
| F1N286;Q5ZM98                  | Stress-70 protein, mitochondrial                              | HSPA9          | 1.255 | 0.983 | 1.008 | 1.435 | 0.328 | -0.025 | 0.012  | 0.521  | 4 |
| P00940                         | Triphosphate isomerase                                        | TPI1           | 1.260 | 0.698 |       | 1.693 | 0.333 | -0.519 |        | 0.759  | 3 |
| F1NIH4;F1NFY8;Q90687           | Tyrosine-protein phosphatase non-receptor type 11 (Fragment)  | PTPN11         | 1.263 | 1.080 | 3.375 |       | 0.336 | 0.111  | 1.755  |        | 3 |
| Q5ZLE8;F1NY80;E1C094           | Putative uncharacterized protein                              | RCJMB04_6i5;Dh | 1.265 |       | 4.177 |       | 0.339 |        | 2.063  |        | 2 |
| G1K342;F1NYB1;P09206;P09653;F1 | Uncharacterized protein                                       | TUBB2C         | 1.265 | 0.933 | 1.217 | 0.883 | 0.339 | -0.100 | 0.283  | -0.179 | 4 |
| Q6XD56;F1NNR6                  | SWAN ribonucleoprotein                                        | RBM12          | 1.265 | 0.886 |       | 1.159 | 0.339 | -0.174 |        | 0.213  | 3 |
| F1N8Z4;Q5ZIC4                  | Uncharacterized protein                                       | RUVBL1;RCJMB0  | 1.272 | 0.623 | 2.327 | 0.360 | 0.347 | -0.682 | 1.218  | -1.474 | 4 |
| Q5ZL82                         | Isocitrate dehydrogenase [NADP]                               | RCJMB04_7e11   | 1.291 | 0.937 | 0.837 | 0.694 | 0.368 | -0.093 | -0.256 | -0.527 | 4 |
| Q5F4B4                         | Cell-cycle related and expression-elevated protein in tumor   | RPRD1B         | 1.303 | 0.546 |       | 0.222 | 0.382 | -0.872 |        | -2.174 | 3 |
| E1C3A1                         | Uncharacterized protein                                       | KIF5B          | 1.303 | 0.879 | 2.137 | 0.449 | 0.382 | -0.186 | 1.096  | -1.155 | 4 |
| Q5ZKLO                         | Uncharacterized protein                                       | MCM5           | 1.305 | 0.772 | 6.235 |       | 0.384 | -0.374 | 2.640  |        | 3 |
| Q5ZLZ1;F1NB20                  | Putative uncharacterized protein                              | RCJMB04_4e20;  | 1.312 | 0.780 |       |       | 0.392 | -0.359 |        |        | 2 |
| F2Z4M0;Q9W7I5;Q9I8G9           | Histone-binding protein RBBP4                                 | RBBP4;RBBP7    | 1.319 | 1.123 | 3.467 | 0.664 | 0.400 | 0.167  | 1.794  | -0.591 | 4 |
| F1NHL2                         | ubiquitin ligase complex                                      | CAND1          | 1.322 | 0.852 | 0.673 | 0.875 | 0.403 | -0.230 | -0.572 | -0.193 | 4 |
| P79994;F1NPT1;F1NXP4;Q6T722    | DNA topoisomerase I                                           | TOP1           | 1.329 | 0.815 | 2.210 | 0.117 | 0.410 | -0.296 | 1.144  | -3.089 | 4 |
| Q5F491;F1NIX1;F1NIX2           | Putative uncharacterized protein                              | RCJMB04_2a4;D  | 1.330 | 0.884 |       |       | 0.412 | -0.177 |        |        | 2 |
| Q5ZLQ7;F1NNL9                  | Putative uncharacterized protein                              | RCJMB04_5d7;G  | 1.332 | 1.180 | 0.665 | 1.047 | 0.413 | 0.239  | -0.589 | 0.067  | 4 |
| F1NFJ0;Q5ZMN2                  | DNA replication licensing factor MCM3                         | MCM3           | 1.370 | 0.741 | 4.389 | 0.728 | 0.454 | -0.433 | 2.134  | -0.457 | 4 |
| F1ND23                         | Uncharacterized protein (Fragment)                            | NDUFS3         | 1.370 | 0.875 | 2.970 |       | 0.454 | -0.193 | 1.570  |        | 3 |
| F1NKB6;E1BXW3;F1NW16;Q8AYP9    | 6-phosphofructokinase                                         | PFKL;pfk       | 1.371 |       | 3.839 |       | 0.455 |        | 1.941  |        | 2 |
| Q5ZK92;F1NCJ3;E1C6S3;Q5ZK92-2  | Spastin                                                       | SPAST          | 1.371 | 0.846 |       | 1.994 | 0.455 | -0.241 |        | 0.996  | 3 |
| F1NEE3;Q5ZM37;F1NLX5           | Uncharacterized protein                                       | PCID2;RCJMB04  | 1.371 | 1.357 | 2.573 |       | 0.456 | 0.440  | 1.363  |        | 3 |
| Q5ZL34;F1NGU9                  | Cleavage and polyadenylation specificity factor subunit 6     | CPSF6          | 1.388 | 0.891 | 0.735 | 1.048 | 0.472 | -0.167 | -0.444 | 0.067  | 4 |
| F1NCI5                         | Uncharacterized protein (Fragment)                            | HNRNPA0        | 1.422 | 0.547 | 3.758 | 1.071 | 0.507 | -0.871 | 1.910  | 0.099  | 4 |
| Q5F426                         | Uncharacterized protein                                       | PDHA1          | 1.431 | 0.632 | 0.568 | 1.646 | 0.517 | -0.662 | -0.815 | 0.719  | 4 |
| F1NJ40;Q5F485;F1POH1           | ATP-dependent RNA helicase DDX42                              | DDX42          | 1.466 | 1.364 |       | 0.592 | 0.552 | 0.448  |        | -0.757 | 3 |
| Q5ZMT0;F1NGW3;F1P2P9           | 14-3-3 protein epsilon                                        | YWHAE          | 1.468 | 0.700 |       |       | 0.553 | -0.515 |        |        | 2 |
| P09244                         | Tubulin beta-7 chain                                          | TUBB7          | 1.474 | 0.631 |       |       | 0.559 | -0.665 |        |        | 2 |
| F1NKR1                         | Uncharacterized protein (Fragment)                            | MAN2A1         | 1.481 | 0.730 | 0.614 | 1.498 | 0.566 | -0.454 | -0.703 | 0.583  | 4 |
| E1C538                         | Uncharacterized protein                                       | NUDT21         | 1.482 | 0.966 | 1.753 | 0.877 | 0.568 | -0.050 | 0.809  | -0.190 | 4 |
| E1C2U4                         | Uncharacterized protein                                       | LOC421110      | 1.487 | 0.781 | 3.985 | 0.445 | 0.572 | -0.356 | 1.994  | -1.168 | 4 |
| Q5ZMM8                         | Uncharacterized protein                                       | LOC416354      | 1.508 | 1.253 | 3.102 |       | 0.592 | 0.325  | 1.633  |        | 3 |
| F1NXX0;Q5ZJV4                  | Uncharacterized protein                                       | C10orf119;MCM  | 1.518 | 0.994 | 3.848 | 0.661 | 0.602 | -0.008 | 1.944  | -0.597 | 4 |
| E1C4U7                         | Uncharacterized protein                                       | NDUFB3         | 1.523 | 0.818 |       |       | 0.607 | -0.289 |        |        | 2 |
| P84172                         | Elongation factor Tu, mitochondrial (Fragment)                | TUFM           | 1.536 | 1.209 | 4.483 | 0.950 | 0.620 | 0.274  | 2.165  | -0.074 | 4 |
| O13016;E1BWI7                  | Tyrosine-protein phosphatase non-receptor type 1              | PTPN1          | 1.548 |       | 2.469 |       | 0.630 |        | 1.304  |        | 2 |
| F1P4A7;F1NQU7;Q5KTT9           | Eukaryotic translation initiation factor 4 gamma 2 (Fragment) | EIF4G2;NAT1    | 1.560 | 0.967 |       |       | 0.641 | -0.049 |        |        | 2 |
| Q5ZL58                         | Uncharacterized protein                                       | SNRPD3         | 1.563 |       | 2.797 |       | 0.644 |        | 1.484  |        | 2 |
| F1NDS2                         | Uncharacterized protein (Fragment)                            | MRPL39         | 1.617 |       | 5.821 | 0.143 | 0.693 |        | 2.541  | -2.808 | 3 |
| F1NXA5;Q5ZI60;Q5ZM02;Q5ZLS1;F  | Uncharacterized protein (Fragment)                            | CORO1C         | 1.649 | 0.380 | 3.285 | 0.179 | 0.721 | -1.396 | 1.716  | -2.485 | 4 |

|                                |                                                      |                    |       |       |       |        |       |        |        |        |       |   |
|--------------------------------|------------------------------------------------------|--------------------|-------|-------|-------|--------|-------|--------|--------|--------|-------|---|
| F1NJG2;Q8AYC6                  | Uracil-DNA glycosylase                               | UNG;ung            | 1.650 | 0.328 | 5.257 | 0.134  | 0.722 | -1.609 | 2.394  | -2.895 | 4     |   |
| E1BYM1                         | mRNA cap guanine-N7 methyltransferase                | RNMT               | 1.675 | 0.721 | 3.276 | 0.174  | 0.744 | -0.472 | 1.712  | -2.520 | 4     |   |
| Q6U7I1;F1N909;F1P4U4;Q6U7I1-2; | Ubiquitin carboxyl-terminal hydrolase 7              | USP7               | 1.690 | 0.615 |       |        | 0.757 | -0.702 |        |        | 2     |   |
| F1N945;F1NE00                  | Uncharacterized protein (Fragment)                   | KIF5C              | 1.730 | 0.651 | 3.919 | 0.265  | 0.790 | -0.620 | 1.970  | -1.914 | 4     |   |
| F1NWF6;Q5ZJU3                  | Asparagine synthetase [glutamine-hydrolyzing]        | ASNS               | 1.846 | 0.891 | 2.691 | 0.432  | 0.884 | -0.166 | 1.428  | -1.209 | 4     |   |
| P00340;E1BTT8                  | L-lactate dehydrogenase A chain                      | LDHA               | 1.918 | 0.539 | 5.168 | 0.368  | 0.940 | -0.891 | 2.370  | -1.442 | 4     |   |
| E1C3R4;E1C6R3                  | Uncharacterized protein                              | LANCL2             | 2.090 |       | 3.593 | 0.389  | 1.064 |        | 1.845  | -1.361 | 3     |   |
| E1C8Q3                         | Uncharacterized protein                              | ALDH18A1           | 2.195 | 1.100 | 4.346 | 1.087  | 1.134 | 0.137  | 2.120  | 0.121  | 4     |   |
| Q5F3C0;E1BVJ5                  | Putative uncharacterized protein                     | RCJMB04_22h1;      | 2.229 | 0.411 | 4.028 | 0.322  | 1.156 | -1.284 | 2.010  | -1.633 | 4     |   |
| Q9PW38;F1P187;E1C756           | Gephyrin                                             | GPHN               | 2.522 | 0.594 | 0.591 |        | 1.335 | -0.751 | -0.759 |        | 3     |   |
| E1BXF5;E1C6D1                  | Microtubule-associated protein                       | MAP2               | 2.663 | 0.213 | 3.106 | 0.564  | 1.413 | -2.233 | 1.635  | -0.825 | 4     |   |
| Q5ZKK1;F1NRY2;F1N8Q2           | Microtubule-associated protein RP/EB family member 2 | MAPRE2             | 2.805 | 0.385 | 2.869 |        | 1.488 | -1.376 | 1.520  |        | 3     |   |
| Q5ZLV5;F1P472;F1P463           | Uncharacterized protein                              | RCJMB04_4i9;CNDP2  |       |       | 0.161 | 3.389  |       |        |        | -2.639 | 1.761 | 2 |
| Q5ZLN1;F1NHM9;F1NQ41           | Phosphoglycerate mutase 1                            | PGAM1              |       |       | 0.235 | 10.508 |       |        |        | -2.089 | 3.393 | 2 |
| F1NDI7;F1NC33;Q04619           | Heat shock cognate protein HSP 90-beta               | HSP90AB1           |       | 0.860 | 0.318 | 0.662  |       | -0.217 | -1.652 | -0.595 | 3     |   |
| Q5ZM75                         | Putative uncharacterized protein                     | RCJMB04_2o24       |       |       | 0.342 | 1.496  |       |        | -1.548 | 0.581  | 2     |   |
| E1C6N0;Q5ZJ35                  | Uncharacterized protein                              | PSMD14             |       |       | 0.350 | 1.702  |       |        | -1.513 | 0.767  | 2     |   |
| E1BZJ3                         | Uncharacterized protein                              | NPLOC4             |       |       | 0.355 | 1.327  |       |        | -1.493 | 0.408  | 2     |   |
| P13648                         | Lamin-A                                              | LMNA               |       |       | 0.358 | 7.185  |       |        | -1.481 | 2.845  | 2     |   |
| E1C3A9;F1NNX1;P81021           | Vigilin                                              | HDLBP              |       |       | 0.361 | 0.616  |       |        | -1.468 | -0.700 | 2     |   |
| Q5ZJV5                         | Uncharacterized protein                              | COX4I1             |       |       | 0.380 | 1.359  |       |        | -1.398 | 0.443  | 2     |   |
| P23007                         | Citrate synthase, mitochondrial                      | CS                 |       |       | 0.407 | 19.213 |       |        | -1.296 | 4.264  | 2     |   |
| F1NU73;Q5ZMF6                  | Uncharacterized protein                              | TRAP1;RCJMB04_2d7  |       | 0.790 | 0.443 | 0.657  |       | -0.341 | -1.174 | -0.606 | 3     |   |
| E1C516                         | Uncharacterized protein                              | PROSC              |       | 1.013 | 0.456 | 1.672  |       | 0.019  | -1.134 | 0.741  | 3     |   |
| F1NV05;F1NIJ6;Q5ZMU3;CON_Q3    | Glucose-6-phosphate isomerase                        | GPI;RCJMB04_1c14   |       | 0.851 | 0.459 |        |       | -0.232 | -1.124 |        | 2     |   |
| P09102;F1N9H3;P12244           | Protein disulfide-isomerase                          | P4HB               |       |       | 0.479 | 3.023  |       |        | -1.063 | 1.596  | 2     |   |
| F1P5J5;Q5ZKF3                  | Uncharacterized protein                              | AARS;RCJMB04_11d4  |       | 1.176 | 0.505 | 0.452  |       | 0.234  | -0.984 | -1.147 | 3     |   |
| Q9YGW6;F1P3H9                  | Ezrin                                                | EZR                |       |       | 0.526 | 0.864  |       |        | -0.927 | -0.211 | 2     |   |
| P54939;E1BWD2;E1C2S1;E1BUK3    | Talin-1                                              | TLN1               |       | 0.416 | 0.531 | 2.243  |       | -1.265 | -0.914 | 1.165  | 3     |   |
| F1NQP8;E1BRG8;Q5F443           | Uncharacterized protein                              | CCDC6;RCJMB04_3i14 |       | 1.712 | 0.573 | 3.605  |       | 0.775  | -0.803 | 1.850  | 3     |   |
| F1NRK5;Q5ZHR4;E1C7P8;E1C1B7;E  | Uncharacterized protein                              | GARS;RCJMB04_34b10 |       | 0.834 | 0.674 | 0.807  |       | -0.262 | -0.570 | -0.310 | 3     |   |
| Q5ZK08;F1NBD1                  | Putative uncharacterized protein                     | RCJMB04_13p14;NARS |       |       | 0.730 | 1.298  |       |        | -0.453 | 0.376  | 2     |   |
| F1NER5                         | Uncharacterized protein                              | CHID1              |       | 0.784 | 0.759 | 1.086  |       | -0.351 | -0.399 | 0.119  | 3     |   |
| F1P4U8                         | Uncharacterized protein                              |                    |       |       | 0.902 | 1.370  |       |        | -0.149 | 0.454  | 2     |   |
| Q5ZMW1;Q8AYI3                  | Aconitase                                            | ACO2               |       |       | 0.904 | 1.695  |       |        | -0.146 | 0.761  | 2     |   |
| F1NXD7                         | Uncharacterized protein                              | SEC23IP            |       |       | 0.994 | 1.375  |       |        | -0.009 | 0.459  | 2     |   |
| E1C555;F1NJN5                  | Uncharacterized protein                              | SMARCD2;SMARCD3    |       | 1.099 | 1.140 | 0.671  |       | 0.136  | 0.189  | -0.576 | 3     |   |
| F1NNI2                         | Uncharacterized protein                              | LONP1              |       |       | 1.191 | 0.364  |       |        | 0.252  | -1.459 | 2     |   |
| E1BVN5                         | Uncharacterized protein                              | PLRG1              |       |       | 1.200 | 0.322  |       |        | 0.263  | -1.637 | 2     |   |
| Q5ZLH1                         | Uncharacterized protein                              | RPA2               |       | 1.259 | 1.217 | 1.238  |       | 0.333  | 0.283  | 0.308  | 3     |   |

|                                |                                                                   |                   |  |       |       |       |  |              |       |              |   |
|--------------------------------|-------------------------------------------------------------------|-------------------|--|-------|-------|-------|--|--------------|-------|--------------|---|
| F1NQH4;Q90YB6;Q90WG3;F1NCE3    | Formin binding protein 11-related protein                         | PRPF40A;FBP       |  |       | 1.293 | 1.170 |  |              | 0.371 | 0.227        | 2 |
| Q9YHT1;F1NPJ4;F1NHM1           | Succinate dehydrogenase [ubiquinone] flavoprotein subunit, mitoch | SDHA              |  | 1.834 | 1.440 |       |  | <b>0.875</b> | 0.526 |              | 2 |
| F1N2Z5                         | Uncharacterized protein                                           | EIF3B             |  |       | 1.446 | 0.439 |  |              | 0.532 | -1.187       | 2 |
| F1NRB9                         | Tubulin alpha 3                                                   | TUBA3E            |  | 0.855 | 1.507 | 0.617 |  | -0.226       | 0.591 | -0.697       | 3 |
| F1NF75                         | Uncharacterized protein                                           | EEPDP1            |  | 1.185 | 1.559 | 0.380 |  | 0.245        | 0.640 | -1.396       | 3 |
| Q5ZKP8;F1NE72;E1C3E0;Q8JGU2;R  | Lysyl-tRNA synthetase                                             | RCJMB04_9m1;KARS  |  | 0.913 | 1.579 | 0.751 |  | -0.131       | 0.659 | -0.413       | 3 |
| P10360                         | Cellular tumor antigen p53                                        | TP53              |  | 0.443 | 1.627 | 0.186 |  | -1.175       | 0.702 | -2.429       | 3 |
| E1C3Y5                         | Protein transport protein Sec23A                                  | SEC23A            |  | 1.605 | 1.669 | 0.114 |  | <b>0.683</b> | 0.739 | -3.134       | 3 |
| E1BTG1                         | Uncharacterized protein                                           | RPL12             |  |       | 1.688 | 3.246 |  |              | 0.755 | <b>1.699</b> | 2 |
| E1BVP9;F1P2M7;Q5F399           | Uncharacterized protein                                           | PRPF38B           |  |       | 1.704 | 0.831 |  |              | 0.769 | -0.267       | 2 |
| Q5F387                         | Uncharacterized protein                                           | SF3A3             |  |       | 1.737 | 0.837 |  |              | 0.796 | -0.257       | 2 |
| F1N8J0;Q5ZLW8                  | Uncharacterized protein                                           | ACAA2;RCJMB04_4j7 |  | 1.141 | 1.742 |       |  | 0.191        | 0.801 |              | 2 |
| F1NCA1;Q5ZL28                  | Uncharacterized protein                                           | CCNK;RCJMB04_8b8  |  | 0.933 | 1.837 |       |  | -0.101       | 0.878 |              | 2 |
| E1BRA6                         | Uncharacterized protein                                           | DNAJC10           |  | 1.766 | 1.841 | 2.047 |  | <b>0.820</b> | 0.881 | <b>1.033</b> | 3 |
| Q5F4A4;E1C707;Q5ZL11;F1N808    | Inosine-5-monophosphate dehydrogenase                             | IMPDP2            |  | 0.303 | 1.885 | 0.498 |  | -1.724       | 0.914 | -1.006       | 3 |
| Q5ZKF7;E1C6M5;F1NIK2           | Putative uncharacterized protein                                  | RCJMB04_11c15;CBL |  | 0.857 | 2.079 | 0.790 |  | -0.223       | 1.056 | -0.340       | 3 |
| E5DEA6;E5DFI5;E5DFL1;P18944;Q4 | Cytochrome c oxidase subunit 2                                    | COX2;MT-CO2;COII  |  | 1.183 | 2.081 |       |  | 0.242        | 1.057 |              | 2 |
| E1BUH7                         | Uncharacterized protein                                           | TMEM43            |  |       | 2.082 | 0.582 |  |              | 1.058 | -0.781       | 2 |
| F1NAC6;D0VX31                  | Uncharacterized protein                                           | UQCRC1            |  |       | 2.117 | 0.167 |  |              | 1.082 | -2.583       | 2 |
| E1BY94                         | Uncharacterized protein                                           | DEPTOR            |  |       | 2.132 | 0.330 |  |              | 1.092 | -1.599       | 2 |
| E1BQK9;F1P2U1                  | Uncharacterized protein                                           | CUL4B;LOC418744   |  | 1.092 | 2.334 | 0.533 |  | 0.127        | 1.223 | -0.908       | 3 |
| Q5ZM11;F1NFP5                  | Arginine--tRNA ligase, cytoplasmic                                | RARS              |  | 0.830 | 2.476 | 0.403 |  | -0.268       | 1.308 | -1.312       | 3 |
| E1BQE4;E1BQE3;E1BQE2           | Uncharacterized protein                                           | RBM26             |  |       | 2.563 | 1.211 |  |              | 1.358 | 0.276        | 2 |
| F1P179;Q5ZJ86                  | Uncharacterized protein                                           | EPRS;RCJMB04_20b9 |  |       | 2.645 | 0.296 |  |              | 1.403 | -1.756       | 2 |
| F1NLG5;F1NR54                  | Uncharacterized protein                                           | SFXN1             |  |       | 2.761 | 0.290 |  |              | 1.465 | -1.785       | 2 |
| Q5ZLW6;F1P394                  | DNA ligase                                                        | RCJMB04_4j11;LIG3 |  |       | 2.826 | 0.245 |  |              | 1.499 | -2.027       | 2 |
| E1BQV7                         | Uncharacterized protein                                           | SLK               |  |       | 2.938 | 0.253 |  |              | 1.555 | -1.985       | 2 |
| P18660                         | 60S acidic ribosomal protein P1                                   | RPLP1             |  | 0.787 | 2.959 |       |  | -0.345       | 1.565 |              | 2 |
| F1P257                         | Uncharacterized protein                                           | TPP2              |  | 0.842 | 3.060 | 0.433 |  | -0.247       | 1.614 | -1.206       | 3 |
| E1C262;E1BWK3                  | Uncharacterized protein                                           | AP3D1             |  |       | 3.160 | 0.577 |  |              | 1.660 | -0.794       | 2 |
| E1BZ78                         | Uncharacterized protein                                           | SMG8              |  | 0.835 | 3.207 |       |  | -0.261       | 1.681 |              | 2 |
| F1N8F0;Q9YGM2                  | <b>Delta-9 desaturase</b>                                         | SCD               |  | 1.951 | 3.587 | 0.841 |  | <b>0.964</b> | 1.843 | -0.250       | 3 |
| E1C0J3;E1C0J4                  | Uncharacterized protein                                           | UPF1              |  |       | 3.598 | 0.718 |  |              | 1.847 | -0.477       | 2 |
| Q5ZLR5                         | Cytochrome b-c1 complex subunit Rieske, mitochondrial             | UQCRCFS1          |  | 0.784 | 3.641 |       |  | -0.351       | 1.864 |              | 2 |
| E1BZ33                         | Uncharacterized protein                                           | MYBBP1A           |  |       | 3.730 | 0.463 |  |              | 1.899 | -1.109       | 2 |
| E1C2I9                         | Uncharacterized protein                                           | LARS              |  |       | 3.917 | 0.250 |  |              | 1.970 | -2.000       | 2 |
| E1BXI7                         | Uncharacterized protein                                           | LARS2             |  |       | 3.920 | 0.477 |  |              | 1.971 | -1.067       | 2 |
| Q8UWC5                         | Nuclear protein matrin 3                                          | MATR3             |  | 0.802 | 3.978 | 1.120 |  | -0.318       | 1.992 | 0.163        | 3 |
| Q5F3L1                         | Ribosomal protein S6 kinase alpha-5                               | RPS6KA5           |  | 0.772 | 4.016 |       |  | -0.373       | 2.006 |              | 2 |
| E1BQH2                         | Uncharacterized protein                                           | IARS              |  |       | 4.444 | 0.312 |  |              | 2.152 | -1.679       | 2 |

|                                |                                                                       |                       |  |        |       |        |       |              |       |              |        |  |
|--------------------------------|-----------------------------------------------------------------------|-----------------------|--|--------|-------|--------|-------|--------------|-------|--------------|--------|--|
| E1BZT5                         | Uncharacterized protein                                               | PRPF8                 |  |        | 4.535 | 0.485  |       |              | 2.181 | -1.045       | 2      |  |
| Q5ZHW3;E1C9E5                  | Uncharacterized protein                                               | BUB3                  |  | 0.740  | 4.773 |        |       | -0.435       | 2.255 |              | 2      |  |
| G1K2Y5;Q5F3X4                  | 116 kDa U5 small nuclear ribonucleoprotein component                  | EFTUD2                |  | 1.380  | 4.973 | 0.717  |       | 0.464        | 2.314 | -0.481       | 3      |  |
| F1NBM0                         | Uncharacterized protein                                               | OGFOD1                |  | 0.908  | 5.133 |        |       | -0.139       | 2.360 |              | 2      |  |
| F1N9U0                         | Uncharacterized protein                                               | PRPF6                 |  |        | 5.749 | 0.721  |       |              | 2.523 | -0.473       | 2      |  |
| F1P0W4                         | Uncharacterized protein                                               | H1FX                  |  |        | 5.777 | 0.250  |       |              | 2.530 | -1.998       | 2      |  |
| Q5ZK03                         | Protein transport protein Sec23A                                      | SEC23A                |  | 0.967  | 6.214 | 0.245  |       | -0.049       | 2.636 | -2.028       | 3      |  |
| A1KXL9;A5HUJ1;F1NBH9           | XCTK2-like motor protein                                              | KIFC1                 |  |        | 8.377 | 0.164  |       |              | 3.066 | -2.611       | 2      |  |
| F1NVY9                         | Uncharacterized protein                                               | ATPIF1                |  | 1.447  |       | 2.040  |       | <b>0.533</b> |       | <b>1.028</b> | 2      |  |
| F1NJU7;Q5ZJ08;REV__A3FM20;REV  | Tyrosine--tRNA ligase, cytoplasmic                                    | YARS                  |  | 1.443  |       | 2.133  |       | <b>0.529</b> |       | <b>1.093</b> | 2      |  |
| E1BW50;Q5ZHU8;F1NRC7;F1NQD1    | Uncharacterized protein                                               | CTNNBL1               |  | 1.318  |       | 1.464  |       | 0.398        |       | 0.550        | 2      |  |
| O42395;O57348;F1N8C2;F1NI84;Q9 | Cellular nucleic acid-binding protein                                 | CNBP                  |  | 1.288  |       | 1.746  |       | 0.365        |       | 0.804        | 2      |  |
| P68034;P68139;P08023;P63270;F1 | Actin, alpha cardiac muscle 1;Actin, alpha skeletal muscle;Actin, aor | ACTC1;ACTA1;ACTA2;ACT |  | 1.248  |       | 0.435  |       | 0.319        |       | -1.201       | 2      |  |
| Q5ZK40                         | SWI/SNF-related matrix-associated actin-dependent regulator of ch     | SMARCB1               |  | 0.978  |       | 0.311  |       | -0.032       |       | -1.686       | 2      |  |
| Q5ZKB2;F1NAGO;Q5ZKR8;REV__O4   | Microtubule-associated protein                                        | RCJMB04_11p11;MCM6    |  | 0.588  |       | 0.327  |       | -0.767       |       | -1.615       | 2      |  |
|                                |                                                                       | median                |  | 0.962  | 0.997 | 1.841  | 0.730 | -0.051       | 0.006 | 0.914        | -0.453 |  |
|                                |                                                                       | 1 sd                  |  | 0.094  | 0.219 | 1.527  | 0.501 | 0.098        | 0.356 | 1.071        | 1.059  |  |
|                                |                                                                       | median +/- 1 sd       |  | -0.001 | 1.089 | -0.560 | 0.993 | -0.001       | 0.123 | -0.295       | -2.157 |  |

Key: **Bold** indicates ratio +/- 1sd of median. Heatmap annotation identifies enriched high confidence ratios (green) decreasing to low confidence or contradictory ratios (red). Green proteins are those also found in FLAG pulldowns
