# Supplementary material for: SILAC-iPAC: A quantitative method for distinguishing genuine from non-specific components of protein complexes by parallel affinity capture
Source: PubMed Central journal article supplement (PMC4329988; doi:10.1016/j.jprot.2014.12.006), 2015-02-06
Supplement: mmc8.pdf [file mmc8.pdf]

**Supplemental Table S4A** . Proteins with  $\geq 1$  statistically significant ratio identified in both CBP and IgG pulldowns .

| UniprotKB IDs                    | Gene                          | Description                                          | location           | Calmodulin pulldown |               |              |              | IgG pulldown |              |              |              |
|----------------------------------|-------------------------------|------------------------------------------------------|--------------------|---------------------|---------------|--------------|--------------|--------------|--------------|--------------|--------------|
|                                  |                               |                                                      |                    | FHDL C1             | FHDL C2       | DHFL C1      | DHFL C2      | FHDL I1      | FHDL I2      | DHFL I1      | DHFL I2      |
| P16039;Q6LEK3                    | NPM1                          | Nucleophosmin                                        | nuc                | <b>2.490</b>        | <b>4.034</b>  | 1.653        | 1.973        | <b>7.377</b> | 1.032        | 0.950        | 1.005        |
| E1C540                           | NPM3                          | Nucleoplasmin-3 I chaperone                          | nuc                | <b>2.902</b>        | <b>2.253</b>  | 1.543        | 0.765        | <b>6.611</b> | <b>1.697</b> | 1.067        | 0.696        |
| F1N8Z4;Q5ZIC4                    | RUVBL1                        | DNA repair. ATP- dependent DNA helicase (3' to 5')   | nuc                |                     | <b>1.951</b>  |              | 0.505        |              | <b>3.026</b> |              | <b>0.233</b> |
| Q5ZMN1;E1C769                    | G3BP1                         | DNA-unwinding enzymes                                | nuc                | 0.818               | <b>1.927</b>  |              | 0.376        | 1.355        | <b>2.151</b> | <b>1.727</b> | <b>0.358</b> |
| Q5XNV3                           | CAPRIN1                       | cell cycle associated protein                        | PM                 | 0.793               | <b>2.383</b>  |              | 0.359        | <b>1.997</b> | <b>7.010</b> |              | <b>0.251</b> |
| F1P5X5;Q5F3B6                    | RCC2                          | telophase disk protein                               | nuc                |                     | <b>2.167</b>  |              | 0.831        |              | <b>1.915</b> |              |              |
| F1NJS6;Q5ZMA9                    | KPNA2                         | Importin subunit                                     | nuc env            |                     | <b>4.429</b>  |              | <b>0.208</b> | <b>0.787</b> | <b>2.908</b> |              | <b>0.216</b> |
| Q5ZI10                           | WBSCR22                       | DNA methylation                                      | nuc                |                     | <b>2.065</b>  |              | 0.533        |              | <b>2.560</b> |              | <b>0.515</b> |
| F1P5K0;Q5F456;F                  | PTBP1                         | ribonucleoproteins (hnRNPs). RNA-binding             | nuc                |                     | <b>2.909</b>  |              | 0.603        |              | <b>1.840</b> |              |              |
| Q5ZIH1                           | HNRNPD                        | nucleic acid binding proteins complex with heterogen | nuc                | 0.927               | <b>1.843</b>  | <b>1.749</b> | 0.879        | <b>2.891</b> | <b>2.416</b> |              | 0.930        |
| Q5F3I2; E1BQF9                   | CSDE1                         | cold shock domain containing E1, RNA-binding         | cyt                |                     | <b>2.372</b>  |              | 0.522        |              | <b>2.192</b> |              | <b>0.318</b> |
| Q45KQ2;Q5ZLU8                    | RCJMB04_4m1                   | Aggrecan promoter binding protein                    | nuc                | <b>1.552</b>        |               | 1.202        | 0.539        | <b>2.371</b> | <b>1.567</b> |              | <b>0.512</b> |
| Q5F491;F1NIX2;<br>A7VJBO;Q9DGR8; | RCJMB04_2a4;<br>DDX3X; CPL10; | Dead Box helicase                                    | nuc                | 0.980               | <b>2.287</b>  | 1.240        | 0.319        | <b>2.675</b> |              | 0.548        |              |
| P0C1H5;F1NF30                    | H2B-VII                       | Histone 2B7                                          | nuc                |                     | <b>1.811</b>  | 0.700        | 1.205        | <b>0.834</b> | <b>1.355</b> | 1.430        | 1.049        |
| Q9DEQ6; E1BT82                   | EIF2S2;EIF2B                  | Eukaryote initiation factor 2                        | cyt                | 0.846               | <b>2.478</b>  |              | 0.549        | <b>0.893</b> | <b>1.856</b> |              | 0.769        |
| P18660                           | RPLP1                         | acidic ribosomal protein P1                          | cyt                |                     | <b>3.761</b>  |              | 1.036        |              | <b>2.335</b> |              |              |
| E1BU66                           | RPL38                         | ribosomal                                            | cyt                |                     | <b>2.201</b>  |              |              | 1.065        | <b>1.326</b> |              |              |
| E1BUZ5                           | RPLP2                         | 60S acidic ribosomal protein P2                      | cyt                |                     | <b>2.566</b>  |              | 1.191        | <b>0.799</b> | <b>2.007</b> |              |              |
| F1NH93                           | RPS20                         | ribosomal                                            | cyt                | 1.017               | <b>2.547</b>  | <b>2.072</b> | 0.367        | 1.395        | 1.490        | 0.829        | <b>0.422</b> |
| F1P304                           | ATP5O                         | ATP synthase subunit O                               | mit                |                     | <b>2.771</b>  |              | 0.378        | <b>2.888</b> | <b>1.935</b> | 0.827        | <b>0.350</b> |
| E1C658                           | ATP5H                         | ATP synthase subunit d                               | mit                |                     | <b>3.461</b>  |              | 0.278        | <b>2.970</b> | <b>1.578</b> | 1.301        | <b>0.313</b> |
| F1NSC1                           | ATP5F1                        | ATP synthase subunit b                               | mit                |                     | <b>2.236</b>  |              | 0.348        | <b>2.101</b> | <b>1.590</b> |              | <b>0.398</b> |
| F1NZ24; Q5ZLZ0                   | SLC25A3                       | Phosphate carrier protein                            | mit                | <b>3.755</b>        | <b>0.761</b>  | 0.692        | 0.526        | <b>2.083</b> | <b>0.715</b> | 0.760        | 0.764        |
| F1NNH9                           | TOMM70A                       | Mitochondrial import receptor subunit                | mit                |                     | <b>1.902</b>  |              | 0.338        |              | <b>2.827</b> |              | <b>0.451</b> |
| F1NBW0                           | MTPAP                         | mitochondrial poly(A) polymerase                     | nuc mit            |                     | <b>2.039</b>  | 0.364        |              |              | <b>1.348</b> |              | 0.626        |
| E1C5I9                           | SRPK1                         | Serine/threonine-protein kinase splicing factor      | nuc, cyt           |                     | <b>3.685</b>  |              | 0.234        |              | <b>4.567</b> |              | <b>0.152</b> |
| F1NBN0                           | MTDH                          | oncogene LYRIC                                       | ER                 |                     | <b>5.371</b>  |              | 0.245        |              | <b>4.205</b> |              | <b>0.194</b> |
| P01875                           | IGHM                          | Ig mu chain c                                        | ER                 | 0.164               | <b>0.733</b>  | <b>0.209</b> | 1.654        |              | <b>0.748</b> | <b>0.183</b> | 0.793        |
| F1NV93;P24367                    | PPIB                          | pp isomerase                                         | ER                 | <b>3.142</b>        | <b>2.635</b>  | 0.723        | 0.245        | <b>5.618</b> | <b>2.920</b> | 0.437        | <b>0.342</b> |
| F1NK96;Q5F472                    | PDIA6                         | Part of a large chaperone multiprotein complex       | ER                 | <b>2.166</b>        | 1.529         | 0.750        | 0.958        | <b>3.028</b> | 1.127        | 0.534        | 1.088        |
| F1NW97;P09644                    | TBA5                          | Tubulin alpha 5 chain                                | cyt                |                     | <b>12.380</b> |              | <b>5.246</b> |              | <b>1.594</b> |              | 1.506        |
|                                  |                               |                                                      | <b>median</b>      | <b>0.815</b>        | <b>0.649</b>  | <b>1.120</b> | <b>1.357</b> | <b>0.984</b> | <b>0.621</b> | <b>0.981</b> | <b>1.712</b> |
|                                  |                               |                                                      | <b>med +/- 1sd</b> | <b>1.508</b>        | <b>1.735</b>  | <b>0.337</b> | <b>0.218</b> | <b>1.872</b> | <b>1.310</b> | <b>0.220</b> | <b>0.560</b> |

Key: **Bold** indicates ratio +/- 1SD of median. Heatmap annotation identifies enriched high confidence ratios (green) decreasing to low confidence or contradictory ratios (red).

**Supplemental Table S4B** . Proteins with  $\geq 1$  statistically significant ratio identified in Calmodulin pulldowns only.

| UniprotKB IDs | Gene name    | Description                                           | location | FHDL_C       | FHDL_C        | DHFL_C       | DHFL_C       | No. sig. |
|---------------|--------------|-------------------------------------------------------|----------|--------------|---------------|--------------|--------------|----------|
| Q5F489;F1NZW0 | F1NZW0       | Transcription initiation factor TFIID subunit         | nuc      | <b>3.113</b> | <b>6.189</b>  | 0.490        | <b>0.103</b> | 3        |
| Q5ZKC3        | RCJMB04_11n1 | uncharacterised, SAM/SH3 domain-containing            |          | <b>3.051</b> | <b>15.490</b> | 1.329        | <b>0.118</b> | 3        |
| F1NCD4        | MYH9         | Myosin 9                                              | cyt      | <b>2.334</b> | <b>2.228</b>  | 0.309        | <b>0.687</b> | 3        |
| Q90753        | brg1/SMARCA4 | regulation of transcription, DNA-dependent            | nuc      |              | <b>3.084</b>  | <b>0.155</b> | <b>0.136</b> | 3        |
| E1C2F9        | IQGAP2       | small GTPase mediated signal transduction             | cyt      |              | <b>6.945</b>  |              | <b>0.182</b> | 2        |
| Q5ZLM0        | CDC73        | Parafibromin, Cell division cycle protein 73 homolog, | nuc      |              | <b>3.775</b>  |              | <b>0.207</b> | 2        |
| F1POU1        | LOC101749184 | E3 ubiquitin-protein ligase UBR5                      | cyt      |              | <b>3.406</b>  |              | <b>0.123</b> | 2        |
| F1N6T4        | FECH         | Ferrochelatase, mitochondrial                         | mit      |              | <b>2.133</b>  |              | <b>0.200</b> | 2        |
| F1P5V4        | HELLS        | methylation-dependent chromatin silencing,            | nuc      |              | <b>4.744</b>  | 0.947        | <b>0.126</b> | 2        |
| E1BTZ4        | TMEM214      | Transmembrane protein 214                             | PM       |              | <b>11.084</b> | <b>2.290</b> | <b>0.157</b> | 2        |
| P02607        | MYL6         | Myosin light polypeptide 6                            | cyt      |              | <b>4.336</b>  |              | 0.219        | 1        |
| E1C555        | SMARCD2      | SWI/SNF-related matrix-associated actin-dependent     | nuc      |              | <b>3.830</b>  |              | 0.304        | 1        |
| F1NY82        | IQGAP1       | Ras GTPase-activating-like protein IQGAP1             | nuc cyt  |              | <b>3.732</b>  |              | 0.219        | 1        |
| F1NF84        | GOLGA2       | Golgin subfamily A member 2                           | golgi    |              | <b>2.924</b>  |              | 0.283        | 1        |
| F1P1A8        | SMARCC1      | SWI/SNF-related matrix-associated actin-dependent     | nuc      |              | <b>2.858</b>  |              | 0.401        | 1        |
| G5H7N8;F1NGV1 | ZC3H15       | Zinc finger CCCH domain-containing protein 15 (DRG)   | nuc cyt  |              | <b>2.790</b>  |              | 0.504        | 1        |
| F1ND93        | PTCD3        | Pentatricopeptide repeat domain-containing protein    | mit      |              | <b>2.215</b>  |              | 0.435        | 1        |
| A5HUJ1        | KIFC1        | Carboxy-terminal kinesin 1                            | cyt      |              | <b>2.214</b>  |              | 0.497        | 1        |
| E1C524        | RALA         | Uncharacterised, actin cytoskeleton reorganization,   | cyt PM   |              | <b>2.201</b>  |              | 0.330        | 1        |
| B6V3H7        | CAPN1        | Mu-calpain large subunit, Calcium-activated neutral   | cyt      |              | <b>2.199</b>  |              | 0.423        | 1        |
| F1N8T0        | NEMF         | Nuclear export mediator factor                        | nuc      |              | <b>2.189</b>  |              | 0.338        | 1        |
| Q765Y9;E1BX55 | DECR1        | 2,4-dienoyl-CoA reductase                             | nuc mit  |              | <b>2.147</b>  |              | 0.325        | 1        |
| Q5ZJ83        | RCJMB04_20c5 | uncharacterised, protein transporter activity         | PM       |              | <b>2.093</b>  |              | 0.347        | 1        |
| E1C1S5        | SUPT6H       | regulation of DNA-dependent transcription,            | nuc      |              | <b>1.313</b>  |              | <b>0.183</b> | 1        |
| F1NR99        | CPOX         | Coproporphyrinogen-III oxidase                        | mit      |              | 1.694         |              | <b>0.188</b> | 1        |
| F1NGU3;F1NX33 | LRPPRC       | Leucine-rich PPR motif-containing protein             | nuc mit  | <b>2.236</b> | 1.440         | 0.979        | <b>0.553</b> | 1        |
| Q5ZLG7        | RCJMB04_6e4  | transmembrane transport                               | mit      | <b>1.810</b> | 1.299         | 0.898        | 0.399        | 1        |

Key: **Bold** indicate ratios +/- 1SD of median. Heatmap annotation identifies enriched high confidence ratios (green) decreasing to low confidence or contradictory ratios (red).

**Supplemental Table S4C .** Proteins with  $\geq 1$  statistically significant ratio identified in IgG pulldowns only.

| UniprotKB IDs  | Gene name | Description                                         | location      | FHDL I1 | FHDL I2 | DHFL I1 | DHFL I2 | No. sig. |
|----------------|-----------|-----------------------------------------------------|---------------|---------|---------|---------|---------|----------|
| P84172         | TUFM      | Elongation factor Tu                                | mit           | 1.030   | 1.311   | 0.655   | 0.521   | 2        |
| F1NJLC         | ATXN2     | ATXN2 protein (Ataxin-2)                            | nuc cyt golgi | 2.527   | 1.214   |         | 0.447   | 2        |
| 042395; 057348 | CNBP      | Cellular nucleic acid-binding protein (Zinc finger  | nuc cyt ER    |         | H       |         | 0.103   | 2        |
| Q52JB0         | DDX47     | Probable ATP-dependent RNA helicase DDX47 (DEAD     | nuc           |         | 1.639   |         | 0.451   | 2        |
| Q5H7M6;F1NXI3  | DRG1      | Developmentally-regulated GTP-binding protein 1     | nuc cyt       |         | 2.494   |         | 0.409   | 2        |
| F1P3YI         | EXOSC1    | Exosome complex component CSL4 (Exosome             | nuc           |         | 1.400   |         | 0.394   | 2        |
| E1C525         | EXOSC10   | Exosome component 10                                | nuc           |         | 1.749   |         | 0.283   | 2        |
| F1N591         | RPL9      | Ribosomal L6                                        | cyt           |         | 1.317   |         | 0.510   | 2        |
| F1NBM0         | OGFOD1    | 2-oxoglutarate and iron-dependent oxygenase         | cyt           |         | 1.663   |         | 0.556   | 2        |
| F1NWH1;RG5150  | RPAP3     | RNA polymerase II-associated protein 3              | cyt           |         | 2.291   |         | 0.290   | 2        |
| E1BVX9;Q5ZK25  | SRP72     | Signal recognition particle subunit SRP72           | cyt           |         | 1.553   |         | 0.511   | 2        |
| Q04678;B62LK1  | SSRP1     | Recombination signal sequence recognition protein 1 | nuc           |         | 1.711   |         | 0.473   | 2        |
| O42283         | HSP10     | 10 kDa heat shock protein                           | mit           | 3.334   |         | 0.454   |         | 1        |
| F1NPL2         | PCBP3     | Poly(rC)-binding protein 3                          | cyt           | 2.108   | 1.271   |         | 0.644   | 1        |
| P35458         | DCTN1     | Dynactin subunit 1                                  | cyt           |         | 1.166   |         | 0.547   | 1        |
| Q5ZKC1;Q52LX2  | EIF2A     | Eukaryotic translation initiation factor 2A         | cyt           |         | 1.426   |         | 0.780   | 1        |
| F1NCI5         | HNRNPA0   | Heterogeneous nuclear ribonucleoprotein A0          | nuc           |         | 1.118   |         | 0.524   | 1        |
| F1NDA0         | NMT1      | Glycylpeptide N-tetradecanoyltransferase 1          | cyt PM        |         | 1.679   |         | 0.581   | 1        |
| E1C080         | RAB8B     | Ras-related protein Rab-8B                          | peroxisome me | 2.449   |         | 0.788   |         | 1        |
| F1NSA8         | RAP1A     | Ras-related protein Rap-1A                          | cyt PM        |         | 1.752   | 0.457   |         | 1        |
| Q5ZJJ2         | RPA1      | Replication protein A 70 kDa DNA-binding subunit    | nuc           |         | 1.864   |         | 0.670   | 1        |
| E1C2C3         | SF3B1     | Splicing factor 3B subunit 1                        | nuc           | 1.399   | 1.277   | 1.065   | 0.497   | 1        |
| Q5F422         | DEK       | regulation of double-strand break repair via        | nuc           | 1.658   | 2.065   |         |         | 1        |
| E1BSR5         | RBM25     | RNA-binding protein 25                              | nuc cyt       | 1.515   | 1.532   |         |         | 1        |
| F1NZU2         | SYNCRIP   | Synaptotagmin-binding, cytoplasmic RNA-interacting  | nuc cyt       |         | 1.340   |         | 0.777   | 1        |
| Q5ZJL7         | WDR76     | DNA damage-binding protein 2                        | nuc           |         | 1.995   |         | 0.821   | 1        |
| E1BRW7         | TTC35     | Tetratricopeptide repeat protein 35                 | mit ER        | 2.506   | 3.088   |         | 1.702   | 2        |

Key: **Bold** indicate ratios +/- 1SD of median. Heatmap annotation identifies enriched high confidence ratios (green) decreasing to low confidence or contradictory ratios (red). H denotes protein found in heavy channel only.
